# Supplementary material for: Ruthenium-catalyzed coupling of α-carbonyl phosphoniums with sulfoxonium ylides via C–H activation/Wittig reaction sequences
Source: Royal Society of Chemistry journal article supplement (doi:10.1039/d1cc00433f), 2021-01-01

## *Supporting Information*

### **Ruthenium-catalyzed coupling of $\alpha$ -carbonyl phosphoniums with sulfoxonium ylides *via* C-H activation/Wittig reaction sequences**

Tian Chen,<sup>a</sup> Zhiqiang Ding,<sup>a</sup> Yuqiu Guan,<sup>a</sup> Ruike Zhang,<sup>a</sup> Jinzhong Yao<sup>\*b</sup> and Zhangpei Chen<sup>\*a</sup>

<sup>a</sup> Center for Molecular Science and Engineering, College of Sciences, Northeastern University, Shenyang 110819, P. R. China, Email: chenzhangpei@mail.neu.edu.cn.

<sup>b</sup> College of Biological, Chemical Sciences and Engineering, Jiaying University, Jiaying 314001, People's Republic of China, Email: jzyao@zju.edu.cn.

### **Table of Contents**

|                                                                    |            |
|--------------------------------------------------------------------|------------|
| <b>I. General Information .....</b>                                | <b>S2</b>  |
| <b>II. General Procedures for the Synthesis of 3 .....</b>         | <b>S2</b>  |
| <b>III. Larger-scale Synthesis and Derivatization of 3aa .....</b> | <b>S8</b>  |
| <b>IV Mechanistic Studies.....</b>                                 | <b>S9</b>  |
| <b>V. References.....</b>                                          | <b>S11</b> |
| <b>VI. Spectral Data for Representative Compounds .....</b>        | <b>S12</b> |

## I. General Information

All reagents and solvents used in this work were obtained from commercial sources and were used without further purification. Thin-layer chromatography (TLC) was performed on silica gel GF254 (0.25 mm thickness) plates and visualized under UV light. Organic solutions were concentrated under reduced pressure at 40 °C (water bath temperature) using a Büchi rotary evaporator, unless otherwise noted. Column chromatography was performed on silica gel (200-300 mesh). <sup>1</sup>H, <sup>13</sup>C and <sup>19</sup>F NMR spectra were recorded with Bruker Avance III HD (400 MHz, 101 MHz and 376 MHz respectively) spectrometers. NMR spectra are reported as follows: chemical shift, multiplicity (s = singlet, d = doublet, t = triplet, q = quarter, m = multiplet, br = broad), coupling (*J*) constant and integration. High resolution mass spectra (HRMS) were recorded on a Waters TOFMS GCT Premier using ESI ionization. All phosphonium salts **1** were prepared according to literature reports<sup>1</sup>.

## II. General Procedures for the Synthesis of **3**

A suspension of arylacyl phosphonium salts **1** (0.10 mmol), sulfoxonium ylides **2** (0.15 mmol), [RuCl<sub>2</sub>(*p*-cymene)]<sub>2</sub> (3.1 mg, 5.0 mol %), and NaOAc (2.0 equiv.) in EtOH (1.0 mL) was stirred at 120 °C for 10 h under an ambient atmosphere of N<sub>2</sub>. After completion, the solvent was removed under vacuum and the residue was purified by column chromatography on silica gel (n-hexane/EtOAc: 30/1~10/1) to yield the corresponding products.

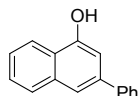

**3aa**: 96% yield

**3-Phenyl-1-naphthol (3aa)**: known compound<sup>2</sup>, 21.1 mg, 96% yield, yellow solid; <sup>1</sup>H NMR (400 MHz, CDCl<sub>3</sub>) δ 8.18 (d, *J* = 7.7 Hz, 1H), 7.92 – 7.85 (m, 1H), 7.70 – 7.66 (m, 3H), 7.53 – 7.45 (m, 4H), 7.38 (t, *J* = 7.4 Hz, 1H), 7.10 (d, *J* = 1.5 Hz, 1H), 5.43 (s, 1H). <sup>13</sup>C NMR (101 MHz, CDCl<sub>3</sub>) δ 151.7, 140.9, 138.9, 134.9, 128.8, 128.0, 127.4, 127.3, 126.9, 125.3, 123.5, 121.5, 118.7, 108.4.

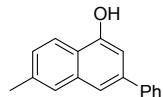

**3ba**: 94% yield

**6-Methyl-3-phenyl-1-naphthol (3ba)**: unknown compound, 22.0 mg, 94% yield, yellow solid; <sup>1</sup>H NMR (400 MHz, CDCl<sub>3</sub>) δ 8.07 (d, *J* = 8.6 Hz, 1H), 7.69-7.66 (m, 2H), 7.64 (s, 1H), 7.57 (s, 1H), 7.47 (t, *J* = 7.3 Hz, 2H), 7.38 (d, *J* = 8.1 Hz, 1H), 7.33 (d, *J* = 8.5 Hz, 1H), 7.02 (s, 1H), 5.43 (s, 1H), 2.53 (s, 3H). <sup>13</sup>C NMR (101 MHz, CDCl<sub>3</sub>) δ 151.7, 141.0, 138.9, 136.6, 135.2, 128.8, 127.6, 127.3, 127.3, 127.0, 121.7, 121.3, 118.2, 107.6, 21.7. HRMS (ESI) *m/z*: calcd for C<sub>17</sub>H<sub>14</sub>NaO [M+Na]<sup>+</sup>: 257.0937, found: 257.0921.

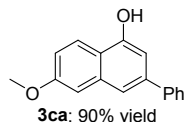

**6-Methoxy-3-phenylnaphthalen-1-ol (3ca):** unknown compound, 22.5 mg, 90% yield, yellow solid;  $^1\text{H}$  NMR (400 MHz,  $\text{CDCl}_3$ )  $\delta$  8.09 (d,  $J = 8.9$  Hz, 1H), 7.67 (d,  $J = 7.2$  Hz, 2H), 7.55 (s, 1H), 7.51-7.44 (m, 2H), 7.42-7.34 (m, 1H), 7.14 (d,  $J = 13.2$  Hz, 2H), 6.94 (s, 1H), 3.94 (s, 3H).  $^{13}\text{C}$  NMR (101 MHz,  $\text{CDCl}_3$ )  $\delta$  158.5, 151.9, 141.0, 139.7, 136.4, 128.8, 127.4, 127.3, 123.3, 118.8, 117.8, 117.8, 106.5, 106.1, 55.3. HRMS (ESI)  $m/z$ : calcd for  $\text{C}_{17}\text{H}_{14}\text{NaO}_2$   $[\text{M}+\text{Na}]^+$ : 273.0886, found: 273.0875.

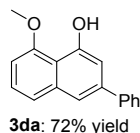

**8-Methoxy-3-phenylnaphthalen-1-ol (3da):** known compound<sup>3</sup>, 18.0 mg, 72% yield, yellow solid;  $^1\text{H}$  NMR (400 MHz,  $\text{CDCl}_3$ )  $\delta$  9.36 (s, 1H), 7.72 (d,  $J = 7.1$  Hz, 2H), 7.53 (d,  $J = 1.7$  Hz, 1H), 7.50-7.45 (m, 3H), 7.35 (dt,  $J = 16.0$ , 7.7 Hz, 2H), 7.19 (d,  $J = 1.7$  Hz, 1H), 6.78 (d,  $J = 7.7$  Hz, 1H), 4.08 (s, 3H).  $^{13}\text{C}$  NMR (101 MHz,  $\text{CDCl}_3$ )  $\delta$  156.1, 154.8, 140.6, 140.4, 136.9, 128.7, 127.5, 127.3, 126.1, 122.1, 116.9, 114.2, 109.8, 103.9, 56.1.

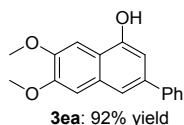

**6,7-Dimethoxy-3-phenylnaphthalen-1-ol (3ea):** unknown compound, 25.8 mg, 92% yield, yellow solid;  $^1\text{H}$  NMR (400 MHz,  $\text{CDCl}_3$ )  $\delta$  7.63 (d,  $J = 8.0$  Hz, 2H), 7.50 (d,  $J = 12.0$  Hz, 2H), 7.43 (t,  $J = 7.5$  Hz, 2H), 7.34 (t,  $J = 7.2$  Hz, 1H), 7.16 (s, 1H), 6.97 (s, 1H), 4.05 (br, 1H), 4.02 (s, 3H), 4.01 (s, 3H).  $^{13}\text{C}$  NMR (101 MHz,  $\text{CDCl}_3$ )  $\delta$  151.0, 150.0, 148.9, 141.1, 137.3, 130.9, 128.7, 127.0, 124.9, 118.8, 117.1, 107.0, 106.6, 100.7, 55.8, 55.8. HRMS (ESI)  $m/z$ : calcd for  $\text{C}_{18}\text{H}_{17}\text{O}_3$   $[\text{M}+\text{H}]^+$ : 281.1172, found: 281.1190.

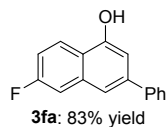

**6-Fluoro-3-phenylnaphthalen-1-ol (3fa):** known compound<sup>4</sup>, 20.0 mg, 83% yield, yellow solid;  $^1\text{H}$  NMR (400 MHz,  $\text{CDCl}_3$ )  $\delta$  8.19-8.15 (m, 1H), 7.62 (d,  $J = 8.0$  Hz, 2H), 7.53 (s, 1H), 7.46-7.42 (m, 3H), 7.38-7.33 (m, 1H), 7.24-7.19 (m, 1H), 6.97 (s, 1H), 5.54 (s, 1H).  $^{13}\text{C}$  NMR (101 MHz,  $\text{CDCl}_3$ )  $\delta$  161.5 ( $J = 246.6$  Hz), 151.9, 140.4 ( $J = 23.0$  Hz), 136.0 ( $J = 9.7$  Hz), 128.8, 127.7, 127.3, 124.5 ( $J = 9.3$  Hz), 120.6, 118.0, 118.0, 115.4 ( $J = 25.2$  Hz), 111.0 ( $J = 20.6$  Hz), 107.7 ( $J = 2.2$  Hz).  $^{19}\text{F}$  NMR (376 MHz,  $\text{CDCl}_3$ )  $\delta$  -114.0.

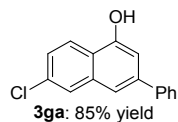

**6-Chloro-3-phenylnaphthalen-1-ol (3ga):** unknown compound, 21.6 mg, 85% yield, yellow solid;  $^1\text{H}$  NMR (400 MHz,  $\text{CDCl}_3$ )  $\delta$  8.14 (d,  $J = 8.9$  Hz, 1H), 7.84-7.82 (m, 1H), 7.65 (d,  $J = 7.4$  Hz, 2H), 7.54 (s, 1H), 7.49-7.45 (m, 2H), 7.43-7.30 (m, 2H), 7.04 (s, 1H), 5.52 (s, 1H).  $^{13}\text{C}$  NMR (101 MHz,  $\text{CDCl}_3$ )  $\delta$  151.8, 140.4, 140.3, 135.7, 132.8,

128.9, 127.7, 127.3, 126.5, 126.0, 123.5, 121.8, 117.8, 108.6. HRMS (ESI)  $m/z$ : calcd for  $C_{16}H_{13}ClO$   $[M+H]^+$ : 255.0571, found: 255.0580.

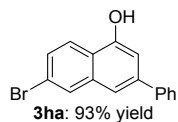

**6-Bromo-3-phenylnaphthalen-1-ol (3ha):** known compound<sup>4</sup>, 28.0 mg, 93% yield, yellow solid;  $^1H$  NMR (400 MHz,  $CDCl_3$ )  $\delta$  8.07 (d,  $J = 8.9$  Hz, 1H), 8.01 (d,  $J = 2.0$  Hz, 1H), 7.66-7.64 (m, 2H), 7.56-7.52 (m, 2H), 7.48 (t,  $J = 7.6$  Hz, 2H), 7.42-7.36 (m, 1H), 7.08 (d,  $J = 1.6$  Hz, 1H), 5.46 (s, 1H).  $^{13}C$  NMR (101 MHz,  $CDCl_3$ )  $\delta$  151.9, 140.5, 140.3, 136.1, 129.9, 128.9, 128.5, 127.8, 127.3, 123.6, 122.0, 121.2, 117.7, 108.8.

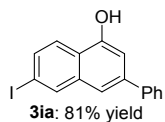

**6-Iodo-3-phenylnaphthalen-1-ol (3ia):** unknown compound, 28.0 mg, 81% yield, yellow solid;  $^1H$  NMR (400 MHz,  $CDCl_3$ )  $\delta$  8.26-8.23 (m, 1H), 7.92 (d,  $J = 8.8$  Hz, 1H), 7.71 (dd,  $J = 8.8, 1.7$  Hz, 1H), 7.67-7.62 (m, 2H), 7.51-7.44 (m, 3H), 7.41-7.36 (m, 1H), 7.08 (d,  $J = 1.5$  Hz, 1H), 5.47 (br, 1H).  $^{13}C$  NMR (101 MHz,  $CDCl_3$ )  $\delta$  151.9, 140.4, 140.0, 136.5, 136.5, 133.7, 128.9, 127.7, 127.3, 123.4, 122.3, 117.5, 108.9, 93.1. HRMS (ESI)  $m/z$ : calcd for  $C_{16}H_{12}IO$   $[M+H]^+$ : 346.9927, found: 346.9939.

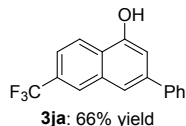

**3-Phenyl-6-(trifluoromethyl)naphthalen-1-ol (3ja):** unknown compound, 19.0 mg, 66% yield, yellow solid;  $^1H$  NMR (400 MHz,  $DMSO-d_6$ )  $\delta$  8.31 (d,  $J = 8.5$  Hz, 1H), 8.16 (s, 1H), 7.72 (s, 1H), 7.69-7.60 (m, 3H), 7.52-7.47 (m, 2H), 7.43-7.39 (m, 1H), 7.19-7.17 (m, 1H), 5.55 (s, 1H).  $^{13}C$  NMR (101 MHz,  $DMSO-d_6$ )  $\delta$  151.7, 140.4, 140.2, 133.8, 129.0, 128.6, 127.9, 127.3, 125.7, 125.57 (q,  $J = 4.6$  Hz), 124.7, 123.1, 120.74 (q,  $J = 3.0$  Hz), 119.3, 110.3. HRMS (ESI)  $m/z$ : calcd for  $C_{17}H_{12}F_3O$   $[M+H]^+$ : 289.0835, found: 289.0834.

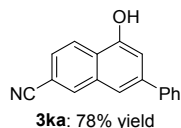

**5-Hydroxy-7-phenyl-2-naphthonitrile (3ka):** unknown compound, 19.1 mg, 78% yield, yellow solid;  $^1H$  NMR (400 MHz,  $CDCl_3$ )  $\delta$  10.76 (s, 1H), 8.53 (s, 1H), 8.26 (d,  $J = 8.9$  Hz, 1H), 7.80 (s, 1H), 7.73-7.68 (m, 3H), 7.55-7.49 (m, 2H), 7.44 (d,  $J = 6.8$  Hz, 1H), 7.34 (s, 1H).  $^{13}C$  NMR (101 MHz,  $CDCl_3$ )  $\delta$  153.8, 140.2, 139.7, 134.3, 133.6, 129.1, 128.0, 126.9, 125.1, 125.0, 123.6, 119.3, 116.7, 110.2, 109.1. HRMS (ESI)  $m/z$ : calcd for  $C_{17}H_{12}NO$   $[M+H]^+$ : 246.0913, found: 246.0912.

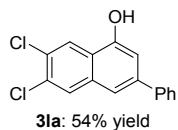

**6,7-Dichloro-3-phenylnaphthalen-1-ol (3la):** unknown compound, 15.6 mg, 54% yield, yellow solid;  $^1\text{H}$  NMR (400 MHz,  $\text{CDCl}_3$ )  $\delta$  8.10 (d,  $J = 9.0$  Hz, 1H), 8.06 (s, 1H), 7.70 (d,  $J = 7.4$  Hz, 2H), 7.52-7.46 (m, 3H), 7.41 (t,  $J = 7.3$  Hz, 1H), 7.13 (s, 1H), 5.46 (br, 1H).  $^{13}\text{C}$  NMR (101 MHz,  $\text{CDCl}_3$ )  $\delta$  151.0, 140.3, 139.4, 132.4, 130.7, 128.4, 128.0, 127.0, 126.5, 125.4, 121.9, 120.8, 114.6, 108.2. HRMS (ESI)  $m/z$ : calcd for  $\text{C}_{16}\text{H}_9\text{Cl}_2\text{O}$  [ $\text{M}-\text{H}$ ] $^-$ : 287.0030, found: 287.0036.

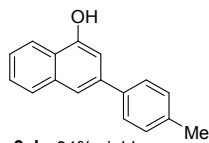

**3-(p-Tolyl)naphthalen-1-ol (3ab):** known compound<sup>2</sup>, 22.0 mg, 94% yield, yellow solid;  $^1\text{H}$  NMR (400 MHz,  $\text{CDCl}_3$ )  $\delta$  8.18-8.15 (m, 1H), 7.87-7.83 (m, 1H), 7.64-7.64 (m, 1H), 7.61-7.56 (m, 2H), 7.54-7.45 (m, 2H), 7.32-7.26 (m, 2H), 7.09 (d,  $J = 1.6$  Hz, 1H), 5.36 (br, 1H), 2.42 (s, 3H).  $^{13}\text{C}$  NMR (101 MHz,  $\text{CDCl}_3$ )  $\delta$  151.7, 138.8, 138.0, 137.3, 135.0, 129.5, 127.9, 127.1, 126.8, 125.1, 123.4, 121.4, 118.4, 108.3, 21.1.

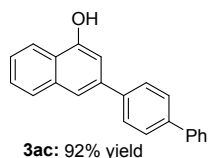

**3-([1,1'-Biphenyl]-4-yl)naphthalen-1-ol (3ac):** known compound<sup>4</sup>, 27.3 mg, 92% yield, yellow solid;  $^1\text{H}$  NMR (400 MHz,  $\text{CDCl}_3$ )  $\delta$  8.19 (d,  $J = 8.0$  Hz, 1H), 7.92-7.84 (m, 1H), 7.79-7.74 (m, 2H), 7.73-7.64 (m, 5H), 7.56-7.45 (m, 4H), 7.39-7.35 (m, 1H), 7.15 (s, 1H), 5.49 (br, 1H).  $^{13}\text{C}$  NMR (101 MHz,  $\text{CDCl}_3$ )  $\delta$  151.8, 140.6, 140.3, 139.8, 138.3, 135.0, 128.8, 128.0, 127.6, 127.5, 127.4, 127.0, 126.9, 125.3, 123.6, 121.5, 118.6, 108.2.

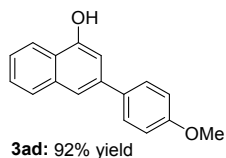

**3-(4-Methoxyphenyl)naphthalen-1-ol (3ad):** known compound<sup>2</sup>, 23.0 mg, 92% yield, yellow solid;  $^1\text{H}$  NMR (400 MHz,  $\text{CDCl}_3$ )  $\delta$  8.17 (d,  $J = 7.9$  Hz, 1H), 7.85 (d,  $J = 7.7$  Hz, 1H), 7.61 (d,  $J = 8.8$  Hz, 3H), 7.53-7.44 (m, 2H), 7.09-6.98 (m, 3H), 5.57 (br, 1H), 3.87 (s, 3H).  $^{13}\text{C}$  NMR (101 MHz,  $\text{CDCl}_3$ )  $\delta$  159.2, 151.7, 138.5, 135.0, 133.4, 128.4, 127.9, 126.8, 125.0, 123.3, 121.4, 117.9, 114.3, 108.2, 55.4.

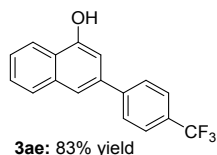

**3-(4-(Trifluoromethyl)phenyl)naphthalen-1-ol (3ae):** known compound<sup>2</sup>, 23.9 mg, 83% yield, yellow solid;  $^1\text{H}$  NMR (400 MHz,  $\text{CDCl}_3$ )  $\delta$  8.23-8.17 (m, 1H), 7.90-7.85 (m, 1H), 7.78 (d,  $J = 8.2$  Hz, 2H), 7.72 (d,  $J = 8.3$  Hz, 2H), 7.67 (s, 1H), 7.57-7.49 (m, 2H), 7.08 (d,  $J = 1.6$  Hz, 1H), 5.43 (s, 1H).  $^{13}\text{C}$  NMR (101 MHz,  $\text{CDCl}_3$ )  $\delta$  152.0, 144.4, 137.3, 134.8, 129.4 (q,  $J = 32.5$  Hz), 128.1, 127.5, 127.1, 125.9, 125.73 (q,  $J = 3.8$  Hz), 123.9, 122.9, 121.5, 119.3, 108.0.  $^{19}\text{F}$  NMR (377 MHz,  $\text{CDCl}_3$ )  $\delta$  -62.4.

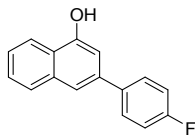

**3af:** 85% yield

**3-(4-Fluorophenyl)naphthalen-1-ol (3af):** known compound<sup>2</sup>, 20.3 mg, 85% yield, yellow solid; <sup>1</sup>H NMR (400 MHz, CDCl<sub>3</sub>) δ 8.20-8.13 (m, 1H), 7.89-7.83 (m, 1H), 7.67-7.57 (m, 3H), 7.54-7.45 (m, 2H), 7.20-7.12 (m, 2H), 7.04 (d, *J* = 1.5 Hz, 1H), 5.40 (s, 1H). <sup>13</sup>C NMR (101 MHz, CDCl<sub>3</sub>) δ 162.5 (d, *J* = 246.7 Hz), 151.8, 137.9, 137.0, 134.9, 128.8, 128.8 (d, *J* = 8.1 Hz), 128.0, 127.0, 125.4, 123.5, 121.4, 118.6, 115.7 (d, *J* = 21.4 Hz), 108.2. <sup>19</sup>F NMR (377 MHz, CDCl<sub>3</sub>) δ -115.4.

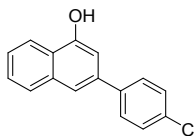

**3ag:** 87% yield

**3-(4-Chlorophenyl)naphthalen-1-ol (3ag):** known compound<sup>2</sup>, 22.2 mg, 87% yield, yellow solid; <sup>1</sup>H NMR (400 MHz, CDCl<sub>3</sub>) δ 8.18 (d, *J* = 7.9 Hz, 1H), 7.86 (d, *J* = 7.7 Hz, 1H), 7.60 (d, *J* = 9.2 Hz, 3H), 7.55-7.47 (m, 2H), 7.46-7.40 (m, 2H), 7.03 (s, 1H), 5.46 (s, 1H). <sup>13</sup>C NMR (101 MHz, CDCl<sub>3</sub>) δ 151.9, 139.3, 137.6, 134.9, 133.5, 129.0, 128.5, 128.0, 127.1, 125.5, 123.6, 121.5, 118.7, 108.0.

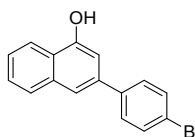

**3ah:** 86% yield

**3-(4-Bromophenyl)naphthalen-1-ol (3ah):** known compound<sup>4</sup>, 25.7 mg, 86% yield, yellow solid; <sup>1</sup>H NMR (400 MHz, CDCl<sub>3</sub>) δ 8.17 (d, *J* = 8.4 Hz, 1H), 7.87-7.82 (m, 1H), 7.62-7.57 (m, 3H), 7.56-7.47 (m, 4H), 7.04 (d, *J* = 1.6 Hz, 1H), 5.37 (s, 1H). <sup>13</sup>C NMR (101 MHz, CDCl<sub>3</sub>) δ 151.9, 139.8, 137.6, 134.9, 131.9, 128.9, 128.0, 127.1, 125.6, 123.7, 121.7, 121.5, 118.7, 107.9.

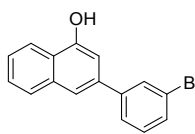

**3ai:** 80% yield

**3-(3-Bromophenyl)naphthalen-1-ol (3ai):** known compound<sup>2</sup>, 23.9 mg, 80% yield, yellow solid; <sup>1</sup>H NMR (400 MHz, CDCl<sub>3</sub>) δ 8.22-8.14 (m, 1H), 7.89-7.79 (m, 2H), 7.66-7.44 (m, 5H), 7.37-7.29 (m, 1H), 7.05 (d, *J* = 1.6 Hz, 1H), 5.42 (s, 1H). <sup>13</sup>C NMR (101 MHz, CDCl<sub>3</sub>) δ 151.9, 143.1, 137.3, 134.8, 130.4, 130.3, 130.3, 128.1, 127.1, 125.9, 125.7, 123.8, 122.9, 121.5, 118.9, 108.0.

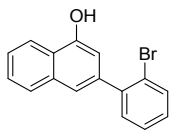

**3aj:** 51% yield

**3-(2-Bromophenyl)naphthalen-1-ol (3aj):** known compound<sup>5</sup>, 15.3 mg, 51% yield, yellow solid; <sup>1</sup>H NMR (400 MHz, CDCl<sub>3</sub>) δ 8.22-8.18 (m, 1H), 7.71-7.67 (m, 1H), 7.69 (d, *J* = 7.6 Hz, 1H), 7.54-7.50 (m, 2H), 7.44 (s, 1H),

7.42-7.35 (m, 2H), 7.25-7.20 (m, 1H), 6.92 (d,  $J = 1.3$  Hz, 1H), 5.38 (s, 1H).  $^{13}\text{C}$  NMR (101 MHz,  $\text{CDCl}_3$ )  $\delta$  150.8, 142.2, 138.8, 134.4, 133.1, 131.4, 128.9, 128.0, 127.4, 126.8, 125.6, 123.6, 121.6, 121.2, 110.5.

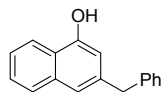

**3ak:** 84% yield

**3-Benzyl-1-naphthol (3ak):** known compound<sup>6</sup>, 19.7 mg, 84% yield, yellow solid;  $^1\text{H}$  NMR (400 MHz,  $\text{CDCl}_3$ )  $\delta$  8.12-8.09 (m, 1H), 7.76-7.7 (m, 1H), 7.50-7.41 (m, 2H), 7.32-7.27 (m, 3H), 7.24-7.20 (m, 3H), 6.63 (d,  $J = 1.4$  Hz, 1H), 5.15 (s, 1H), 4.07 (s, 2H).  $^{13}\text{C}$  NMR (101 MHz,  $\text{CDCl}_3$ )  $\delta$  151.4, 140.8, 139.0, 134.8, 129.0, 128.5, 127.3, 126.6, 126.2, 124.8, 123.1, 121.4, 120.0, 110.1, 42.1.

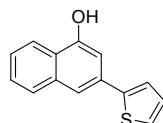

**3al:** 90% yield

**3-(Thiophen-2-yl)naphthalen-1-ol (3al):** known compound<sup>2</sup>, 20.4 mg, 90% yield, yellow solid;  $^1\text{H}$  NMR (400 MHz,  $\text{CDCl}_3$ )  $\delta$  8.16 (d,  $J = 8.0$  Hz, 1H), 7.84 (d,  $J = 8.0$  Hz, 1H), 7.61 (d,  $J = 8.0$  Hz, 3H), 7.50 – 7.44 (m, 2H), 7.06 – 6.99 (m, 3H), 5.57 (br, 1H), 3.87 (s, 3H).  $^{13}\text{C}$  NMR (101 MHz,  $\text{CDCl}_3$ )  $\delta$  159.2, 151.7, 138.5, 135.0, 133.4, 128.3, 127.9, 126.8, 125.0, 123.3, 121.4, 118.0, 114.3, 108.2, 55.4.

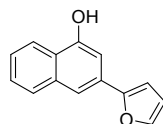

**3am:** 87% yield

**3-(Furan-2-yl)naphthalen-1-ol (3am):** known compound<sup>2</sup>, 18.3 mg, 87% yield, yellow solid;  $^1\text{H}$  NMR (400 MHz,  $\text{CDCl}_3$ )  $\delta$  8.13 (d,  $J = 8.1$  Hz, 1H), 7.84-7.79 (m, 1H), 7.76 (s, 1H), 7.52-7.42 (m, 3H), 7.15-7.12 (m, 1H), 6.72 (d,  $J = 3.4$  Hz, 1H), 6.53-6.49 (m, 1H), 5.38 (s, 1H).  $^{13}\text{C}$  NMR (101 MHz,  $\text{CDCl}_3$ )  $\delta$  153.8, 151.7, 142.3, 134.9, 128.4, 128.0, 127.0, 125.3, 123.8, 121.5, 115.3, 111.8, 105.6, 104.9.

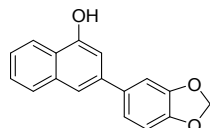

**3an:** 88% yield

**3-(Benzo[d][1,3]dioxol-5-yl)naphthalen-1-ol (3an):** unknown compound, 23.3 mg, 88% yield, yellow solid;  $^1\text{H}$  NMR (400 MHz,  $\text{CDCl}_3$ )  $\delta$  8.16 (d,  $J = 8.1$  Hz, 1H), 7.83 (d,  $J = 8.0$  Hz, 1H), 7.59-7.43 (m, 3H), 7.16-7.13 (m, 2H), 7.04-6.98 (m, 1H), 6.91 (d,  $J = 7.9$  Hz, 1H), 6.02 (s, 2H), 5.42 (s, 1H).  $^{13}\text{C}$  NMR (101 MHz,  $\text{CDCl}_3$ )  $\delta$  151.7, 148.1, 147.2, 138.6, 135.3, 134.9, 127.9, 126.9, 125.1, 123.4, 121.4, 120.8, 118.2, 108.6, 108.3, 107.8, 101.2. HRMS (ESI)  $m/z$ : calcd for  $\text{C}_{17}\text{H}_{11}\text{O}_3$  [ $\text{M}-\text{H}$ ] $^-$ : 263.0708, found: 263.0713.

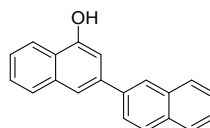

**3ao:** 90% yield

**[2,2'-Binaphthalen]-4-ol (3aa):** known compound<sup>2</sup>, 24.3 mg, 90% yield, yellow solid; <sup>1</sup>H NMR (400 MHz, CDCl<sub>3</sub>) δ 8.22-8.19 (m, 1H), 8.13 (d, *J* = 1.7 Hz, 1H), 7.96-7.88 (m, 4H), 7.86-7.83 (m, 1H), 7.79 (s, 1H), 7.57-7.48 (m, 4H), 7.23 (d, *J* = 1.6 Hz, 1H), 5.49 (s, 1H). <sup>13</sup>C NMR (101 MHz, CDCl<sub>3</sub>) δ 151.8, 138.8, 138.2, 135.0, 133.7, 132.7, 128.5, 128.2, 128.1, 127.7, 127.0, 126.4, 126.0, 126.0, 125.6, 125.4, 123.6, 121.5, 119.1, 108.5.

### III. Larger-scale Synthesis and Derivatization of 3aa.

**Larger-scale synthesis.** A suspension of arylacyl phosphonium salt **1b** (1.061 g, 2.00 mmol), sulfoxonium ylides **2a** (0.432 g, 2.2mmol), [RuCl<sub>2</sub>(*p*-cymene)]<sub>2</sub> (61.2 mg, 5.0 mol %), and NaOAc (0.544 g, 2.0 equiv.) in EtOH (10.0 mL) was stirred at 120 °C for 10 h under an ambient atmosphere of N<sub>2</sub>. After completion, the solvent was removed under vacuum and the residue was purified by column chromatography on silica gel (n-hexane/EtOAc: 30/1~10/1) to yield the corresponding product **3aa** (400.9 mg, 91% yield).

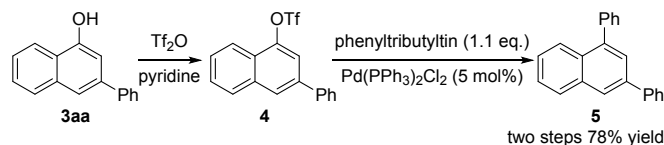

**Derivatization of 3aa.**<sup>7</sup> To a solution of 3-phenylnaphthalen-1-ol (**3aa**) (22 mg, 1 mmol, 1.0 eq.) in 2 mL DCM was added pyridine (0.16 mL, 2 mmol, 2.0 eq.) and the solution was cooled to 0 °C. Trifluoromethanesulfonic anhydride (0.2 mL, 1.2 mmol, 1.2 eq.) was added dropwise and the mixture was warmed to room temperature. The reaction was complete within 5 min as shown by TLC. The mixture was diluted with Et<sub>2</sub>O, quenched with 1 M aq. HCl and washed successively with sat. NaHCO<sub>3</sub> and brine. After drying over Na<sub>2</sub>SO<sub>4</sub>, the solvent was removed under reduced pressure and the residue was purified by flash column chromatography on silica gel to afford the triflate as a light yellow liquid (35.2 mg, 100%). A 25-mL, one-necked, round-bottomed flask equipped with a rubber septum was charged with the obtained 3-phenylnaphthalen-1-yl trifluoromethanesulfonate (35.2 mg, 0.1 mmol) and tributylphenyltin (40 mg, 0.11 mmol) in 1 mL of DMF. Bis(triphenylphosphine)palladium(II) chloride (3.5 mg, 0.005 mmol) was added and the resulting yellow suspension was stirred at room temperature for 30 min. The reaction mixture was then heated at 60 °C for an additional 8 h. The reaction mixture was allowed to cool and then filtered through silica gel in a short column with the aid of Et<sub>2</sub>O to remove the majority of the residual palladium. The filtrate was then washed with 1 N aq HCl solution, water, and saturated NaCl solution, dried over Na<sub>2</sub>SO<sub>4</sub>, filtered, and concentrated to afford a dark brown oily mixture. Column chromatography silica gel (elution with petroleum ether) furnished the desired compound as a colorless oily product.

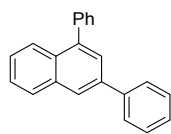

**1,3-Diphenylnaphthalene (5):** known compound<sup>8</sup>, 21.8 mg, 78% yield, yellow oil; <sup>1</sup>H NMR (400 MHz, CDCl<sub>3</sub>) δ 8.08 (s, 1H), 7.98 (d, *J* = 8.1 Hz, 1H), 7.93 (d, *J* = 8.3 Hz, 1H), 7.78 (d, *J* = 8.0 Hz, 2H), 7.73 (s, 1H), 7.59-7.36 (m,



10H).  $^{13}\text{C}$  NMR (101 MHz,  $\text{CDCl}_3$ )  $\delta$  140.9, 140.8, 140.6, 138.0, 134.1, 130.8, 130.1, 128.9, 128.6, 128.3, 127.4, 127.4, 126.7, 126.7, 126.2, 126.1, 125.9, 125.4.

#### IV Mechanistic Studies

**H/D Exchange Experiments.** Under  $\text{N}_2$ , a suspension of phenacyl phosphonium salt **1b** (53.0 mg, 0.10 mmol),  $[\text{RuCl}_2(p\text{-cymene})]_2$  (3.1 mg, 5.0 mol %),  $\text{D}_2\text{O}$  (18  $\mu\text{L}$ , 1.0 mmol), and NaOAc (27.2 mg, 0.2 mmol) in ethanol- $d_6$  (1.0 mL) was stirred at 120  $^\circ\text{C}$  for 10 h. At ambient temperature, the solvent was removed under reduced pressure and the residue was purified by silica gel chromatography using n-hexane/EtOAc to afford a yellow solid product, which was characterized by  $^1\text{H}$  NMR spectroscopy.

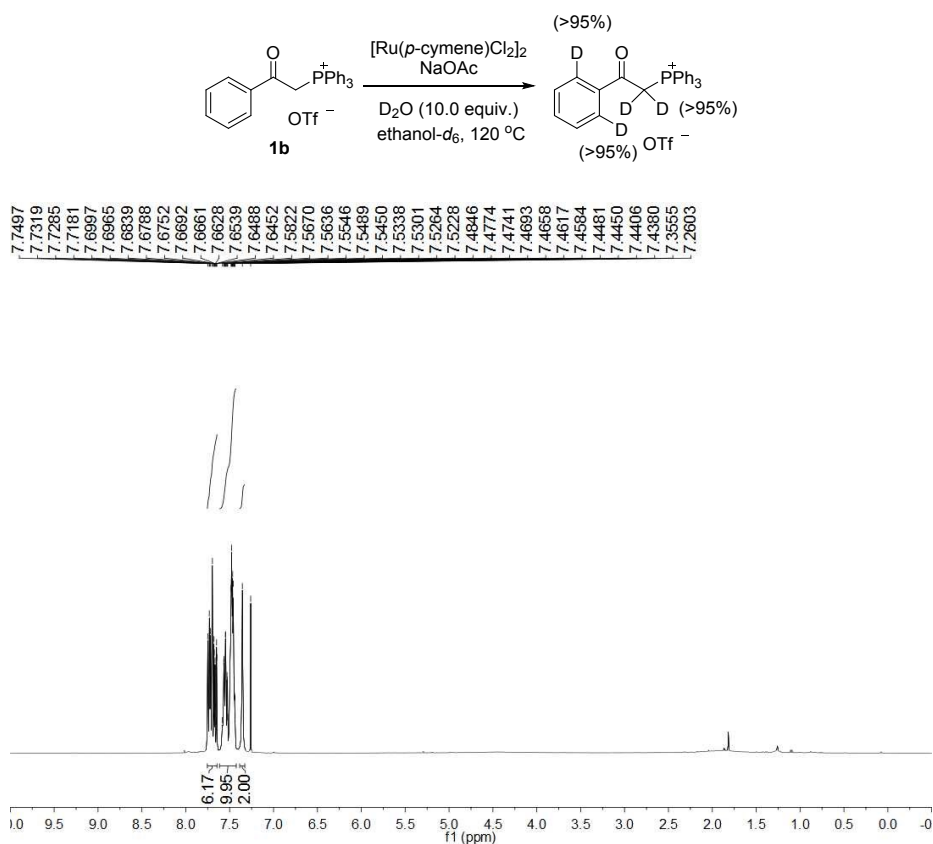

A suspension of phenacyl phosphonium salt **1b** (53.0 mg, 0.10 mmol), sulfoxonium ylides **2** (29.4 mg, 0.15 mmol),  $[\text{RuCl}_2(p\text{-cymene})]_2$  (3.1 mg, 5.0 mol %),  $\text{D}_2\text{O}$  (18  $\mu\text{L}$ , 1.0 mmol), and NaOAc (27.2 mg, 0.2 mmol) in ethanol- $d_6$  (1.0 mL) was stirred at 120  $^\circ\text{C}$  for 10 h under an ambient atmosphere of  $\text{N}_2$ . At ambient temperature, the solvent was removed under reduced pressure and the residue was purified by silica gel chromatography using n-hexane/EtOAc to afford a white solid product, which was characterized by  $^1\text{H}$  NMR spectroscopy.

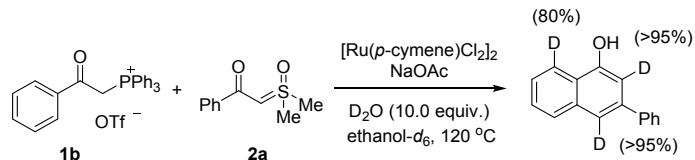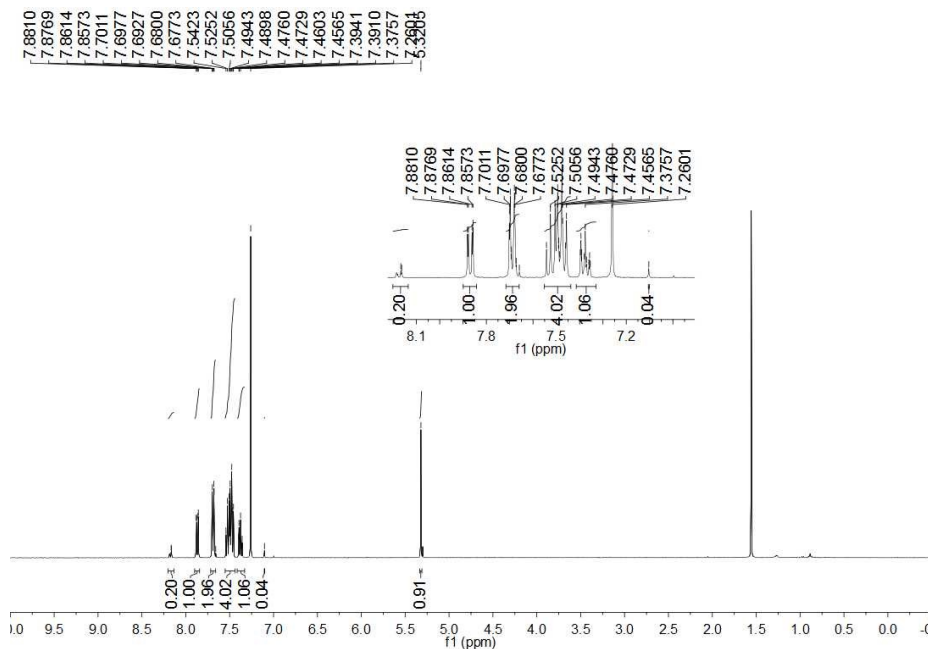

**Kinetic Isotope Effect Experiments.** Two pressure tubes were separately charged with **1b** (0.10 mmol) and **1b-d<sub>5</sub>** (0.1 mmol), and to each tube was added sulfoxonium ylides **2** (0.15 mmol), [RuCl<sub>2</sub>(*p*-cymene)]<sub>2</sub> (3.1 mg, 5.0 mol %), NaOAc (2.0 equiv.), and EtOH (1.0 mL). The two reaction mixtures were stirred side by side in an oil bath preheated at 100 °C for 30 min. After that, the reaction was quenched in an ice bath and n-hexane was rapidly added to each tube. The two mixtures were combined and the solvent was removed under vacuum and the residue was purified by silica gel chromatography using n-hexane/EtOAc: 30/1~10/1 to yield the product **3aa** and **3aa-d<sub>4</sub>** as white solid (2.6 mg, 12% yield). The KIE value was determined to be  $k_H/k_D = 2.1$  on the basis of <sup>1</sup>H NMR analysis.

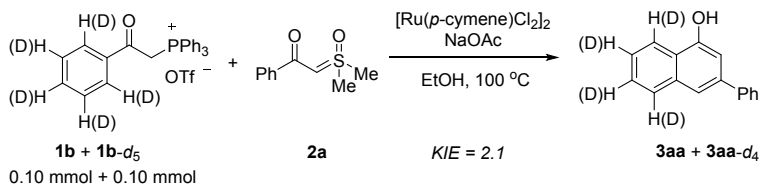

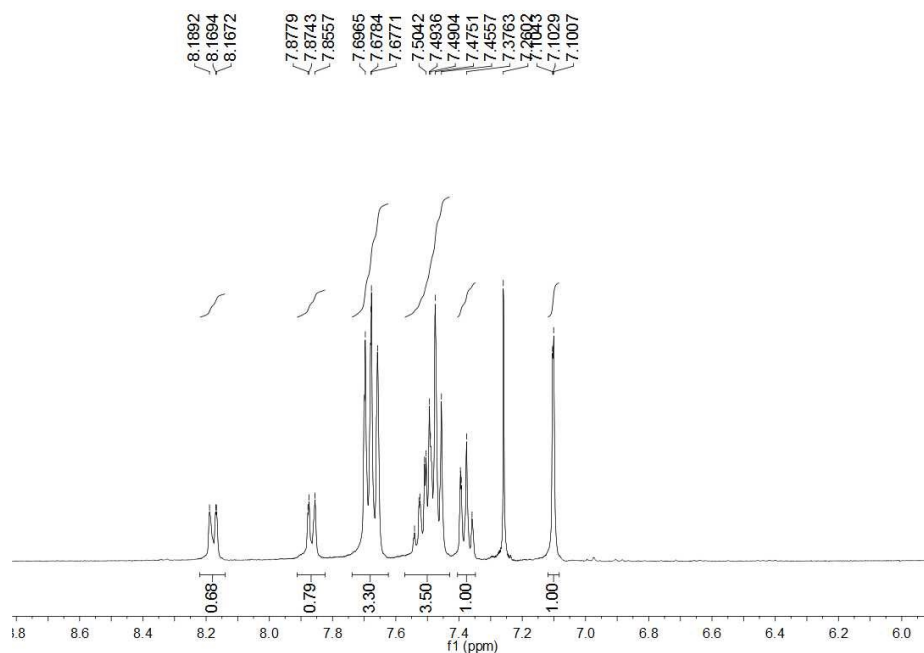

## V. References

1. (a) Y. Li, Q. Wang, X. Yang, F. Xie, X. Li, *Org. Lett.*, **2017**, *19*, 3410-3413; (b) Y. Li, X. Yang, L. Kong, X. Li, *Org. Chem. Front.*, **2017**, *4*, 2114-2118.
2. (a) Z. Lou, S. Zhang, C. Chen, X. Pang, M. Li, L. Wen, *Adv. Synth. Catal.*, **2014**, *356*, 153-159; (b) Y. Guan, Z. Lu, X. Yin, A. Mohammadlou, R. J. Staples, W. D. Wulff, *Synthesis*, **2020**, *52*, 2073-2091.
3. T. Hamura, T. Suzuki, T. Matsumoto, K. Suzuki, *Angew. Chem. Int. Ed.*, **2006**, *45*, 6294-6296.
4. Y. Zhang, R. Jin, W. Kang, H. Guo, *Org. Lett.*, **2020**, *22*, 5502-5505.
5. X. Yu, P. Zhu, M. Bao, Y. Yamamoto, A. I. Almansour, N. Arumugam, R. S. Kumar, *Asian J. Org. Chem.*, **2016**, *5*, 699-704.
6. F. Makra, J. C. Rohloff, A. V. Muehldorf, J. O. Link, *Tetrahedron Lett.*, **1995**, *36*, 6815-6818.
7. I. Piel, M. Steinmetz, K. Hirano, R. Fröhlich, S. Grimme, F. Glorius, *Angew. Chem. Int. Ed.*, **2011**, *50*, 4983-4987.
8. C. Ge, G. Wang, P. Wu, C. Chen, *Org. Lett.*, **2019**, *21*, 13, 5010-5014.

## VI. Spectral Data for Representative Compounds

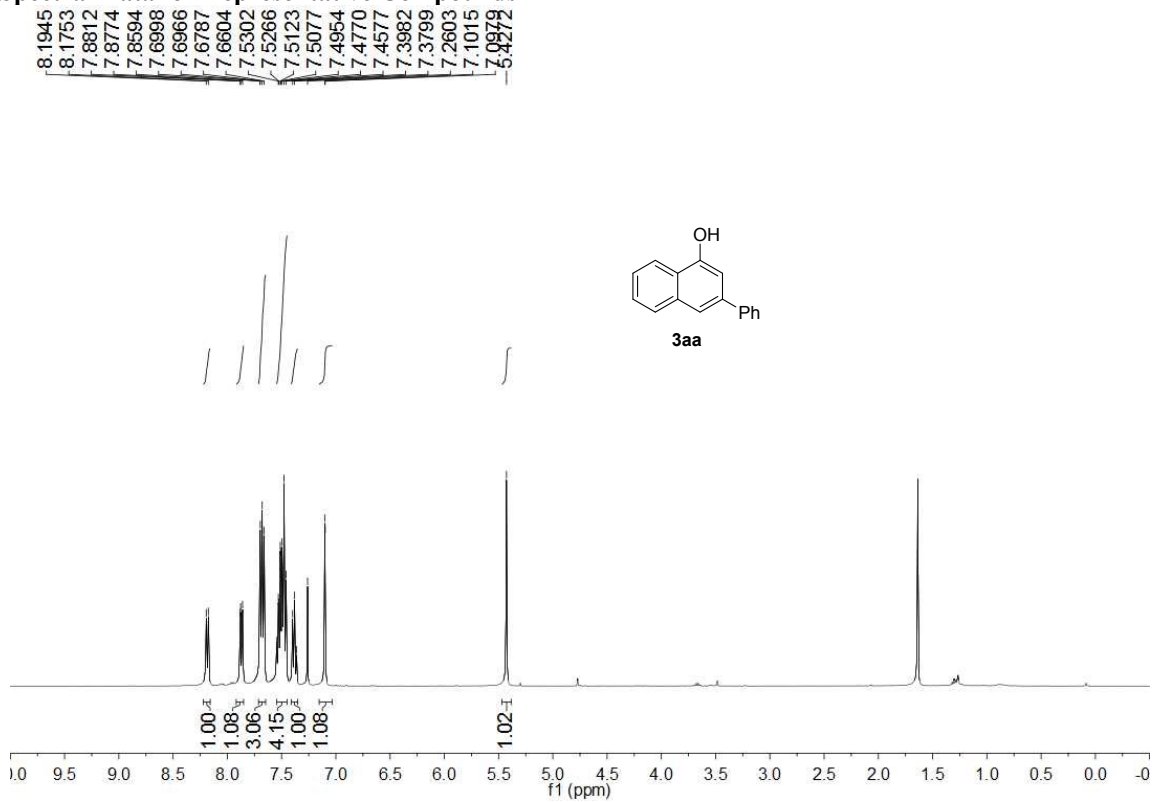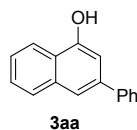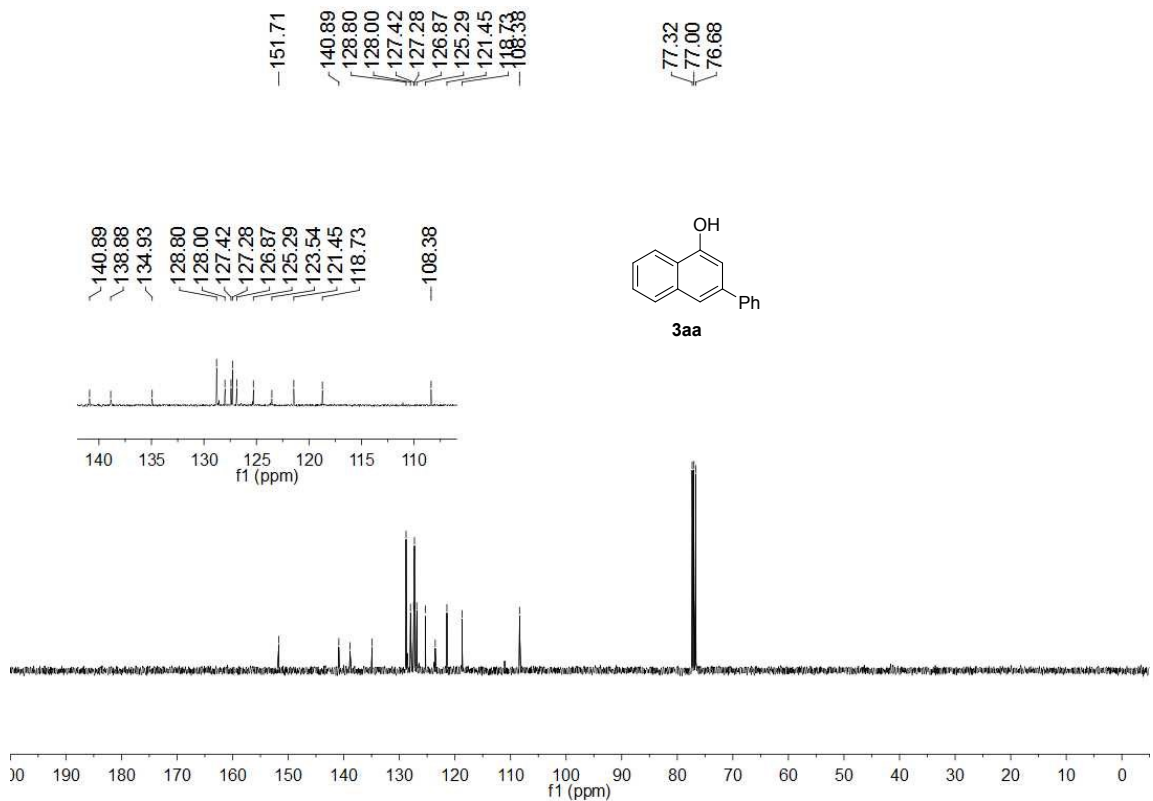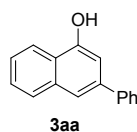

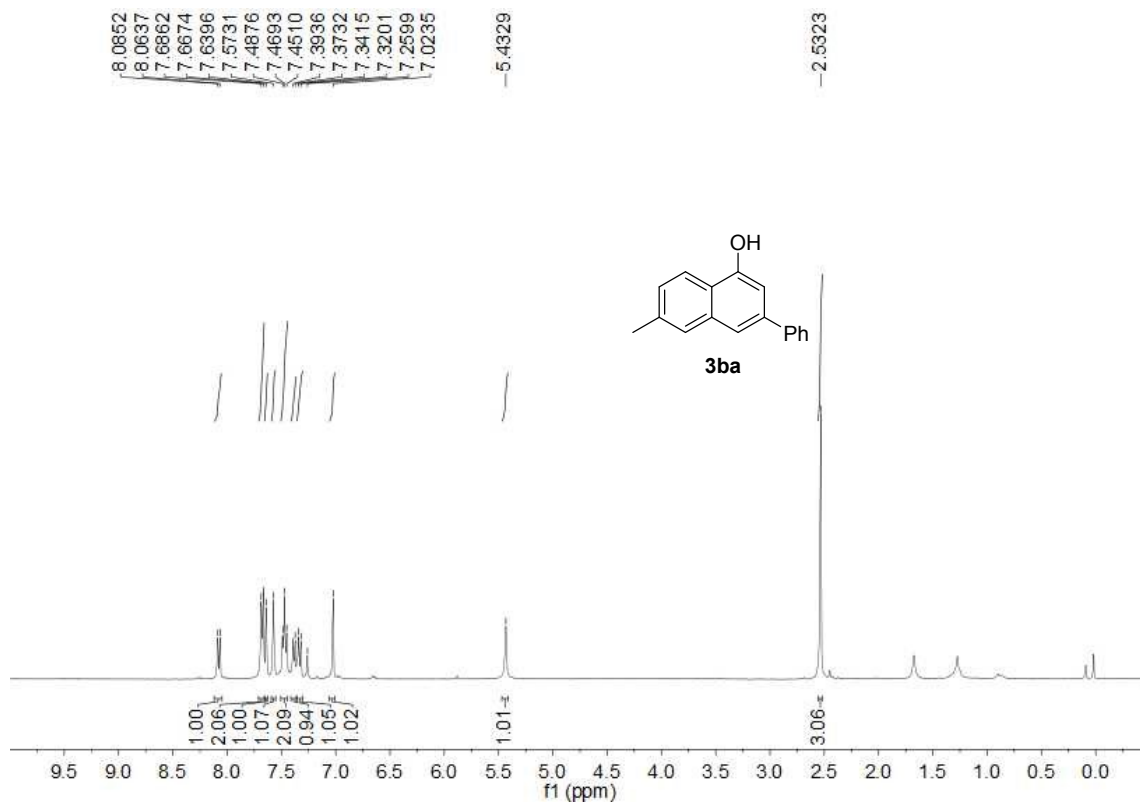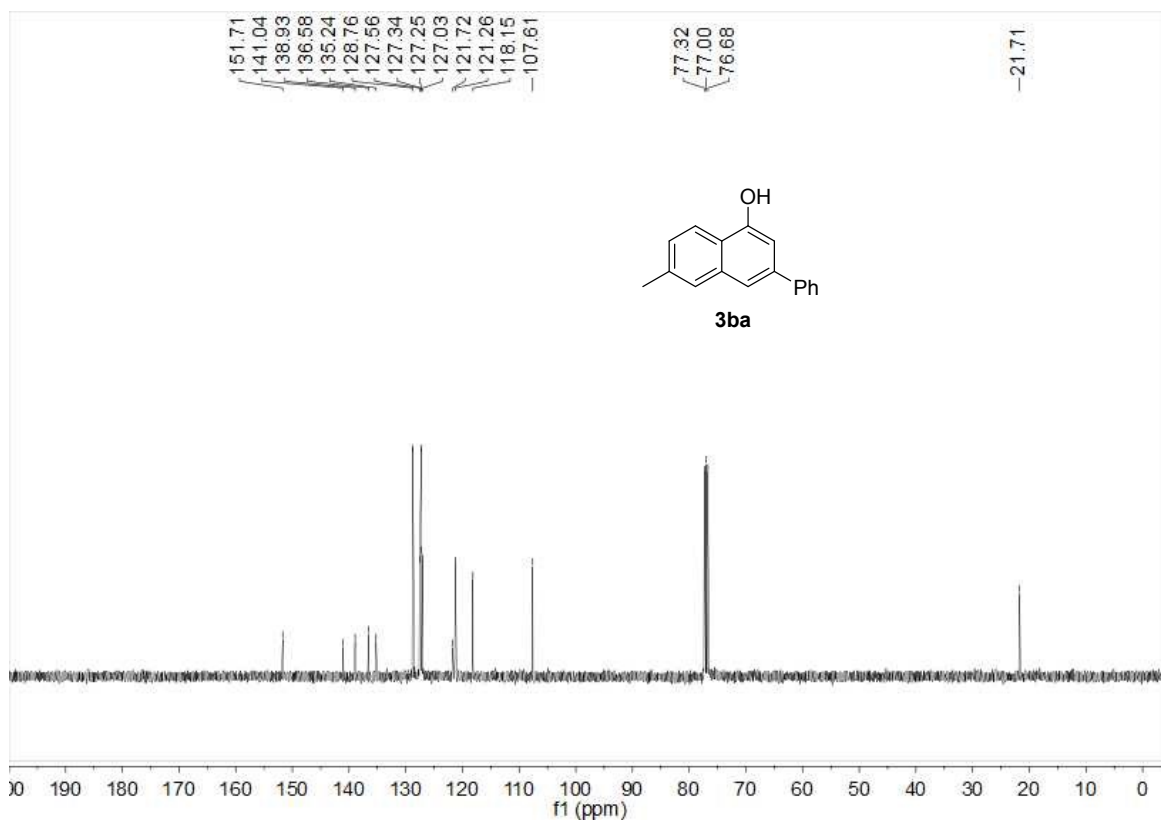

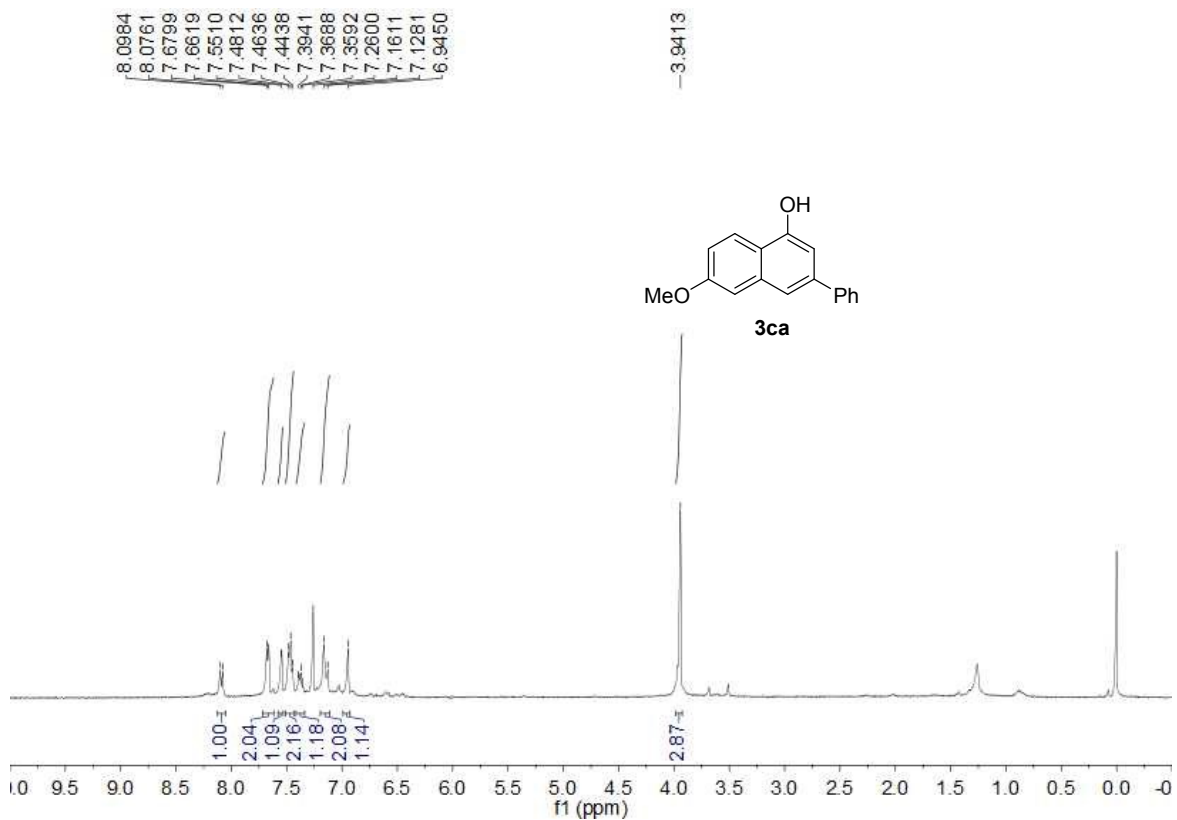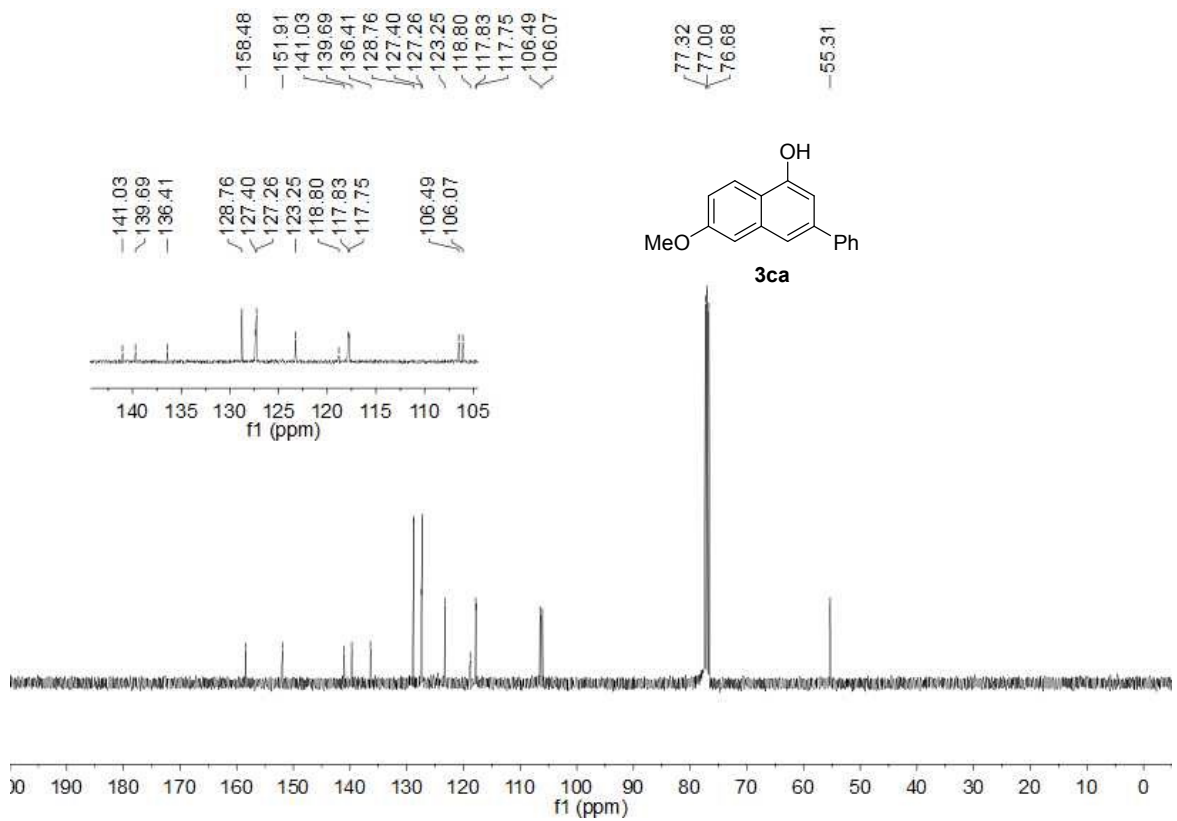

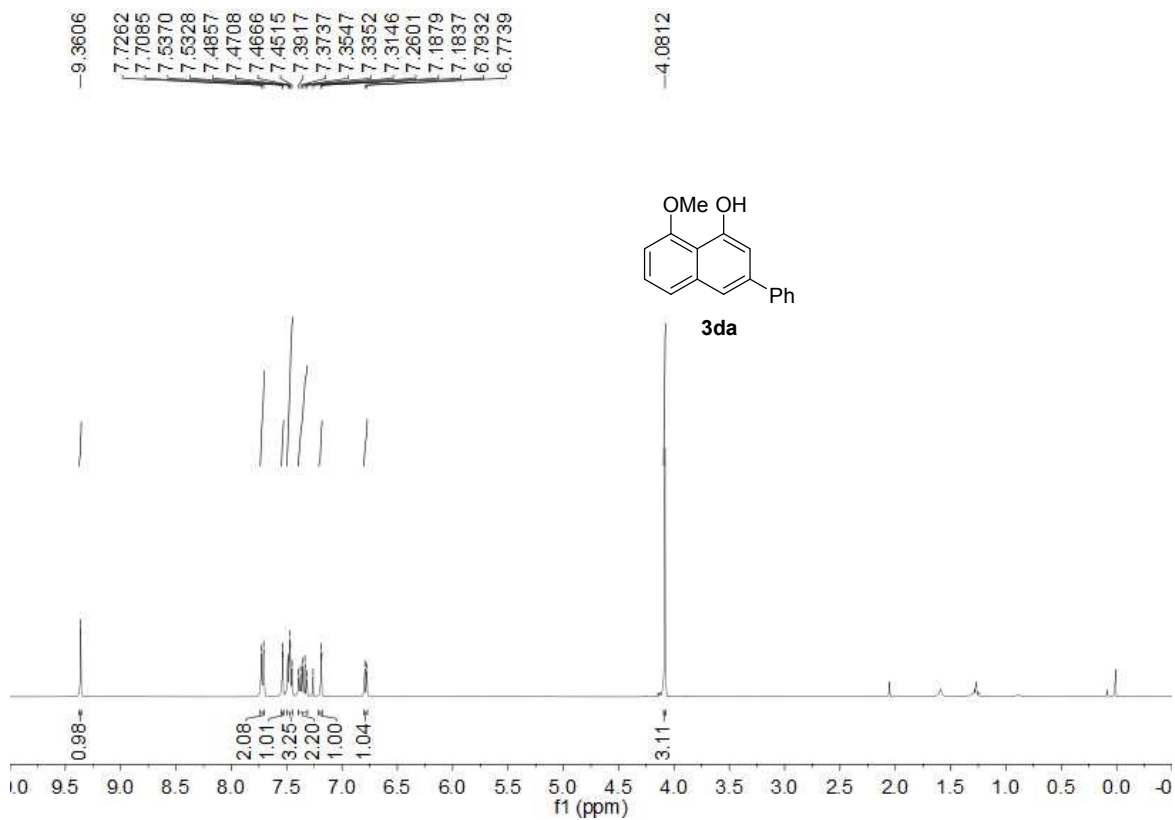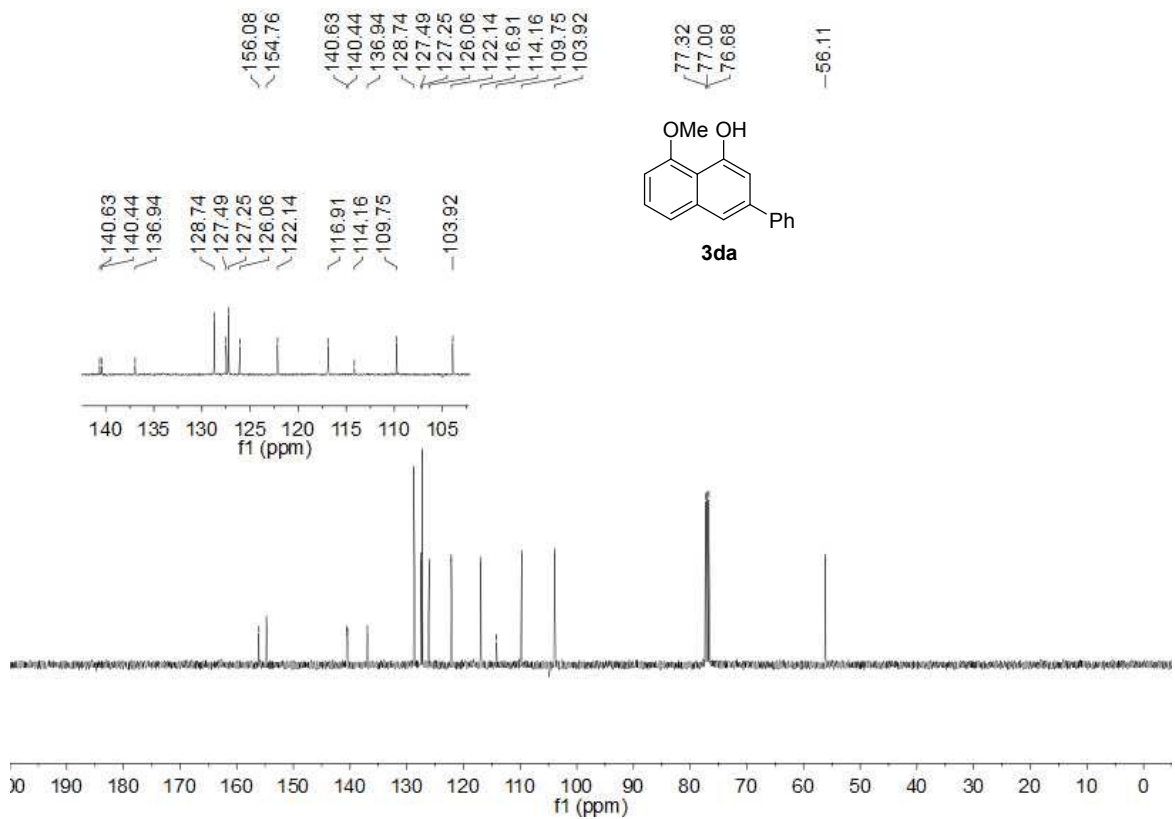

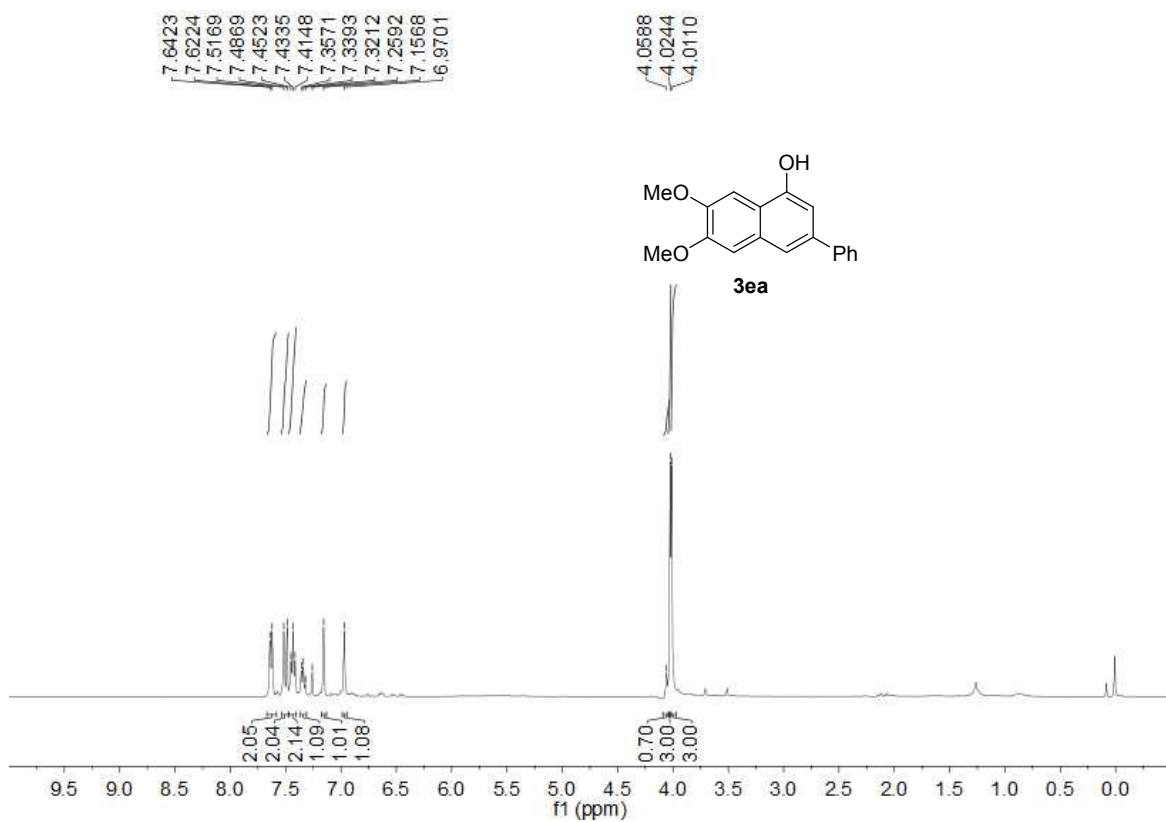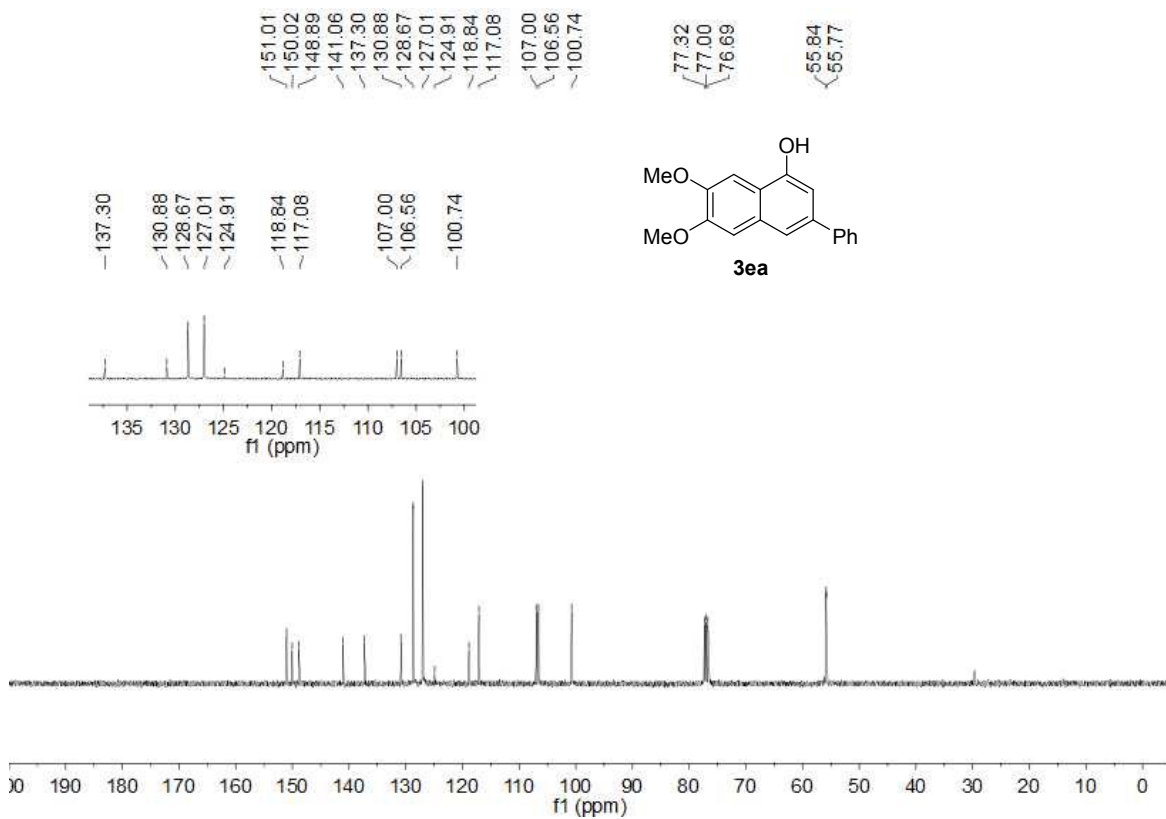



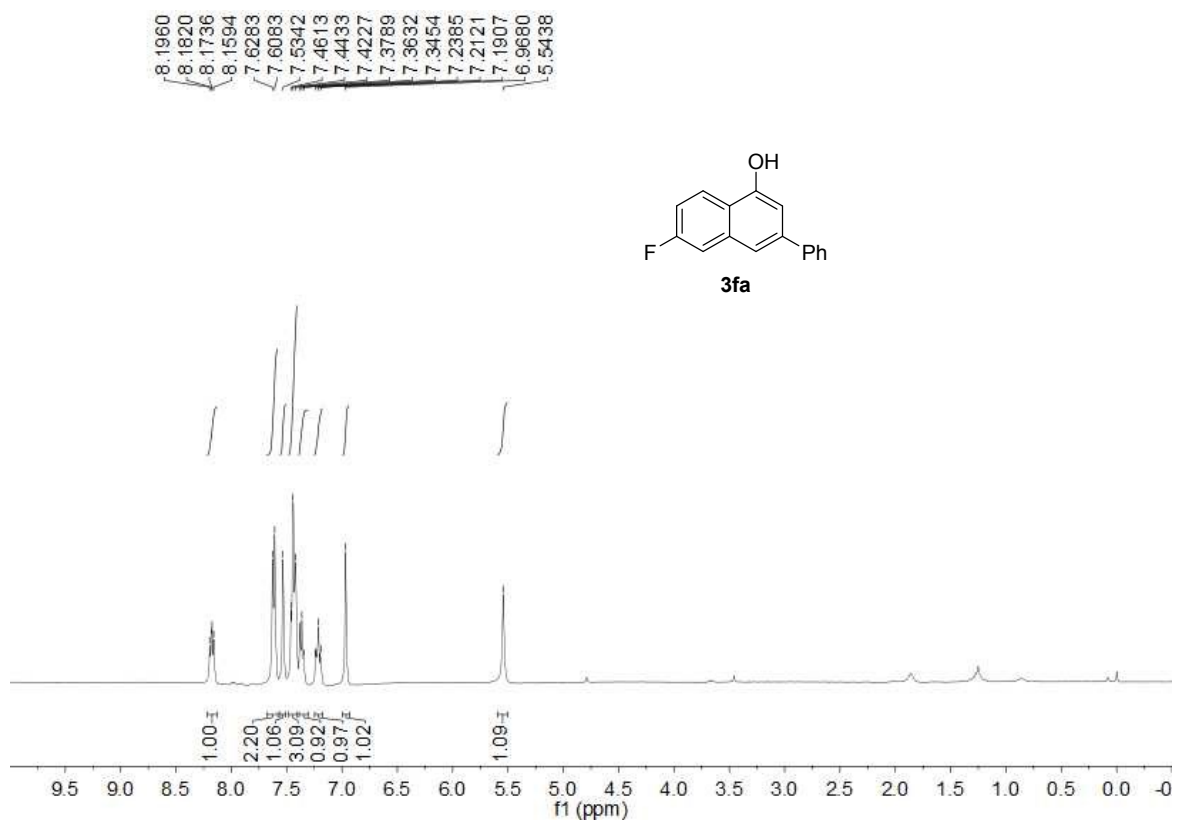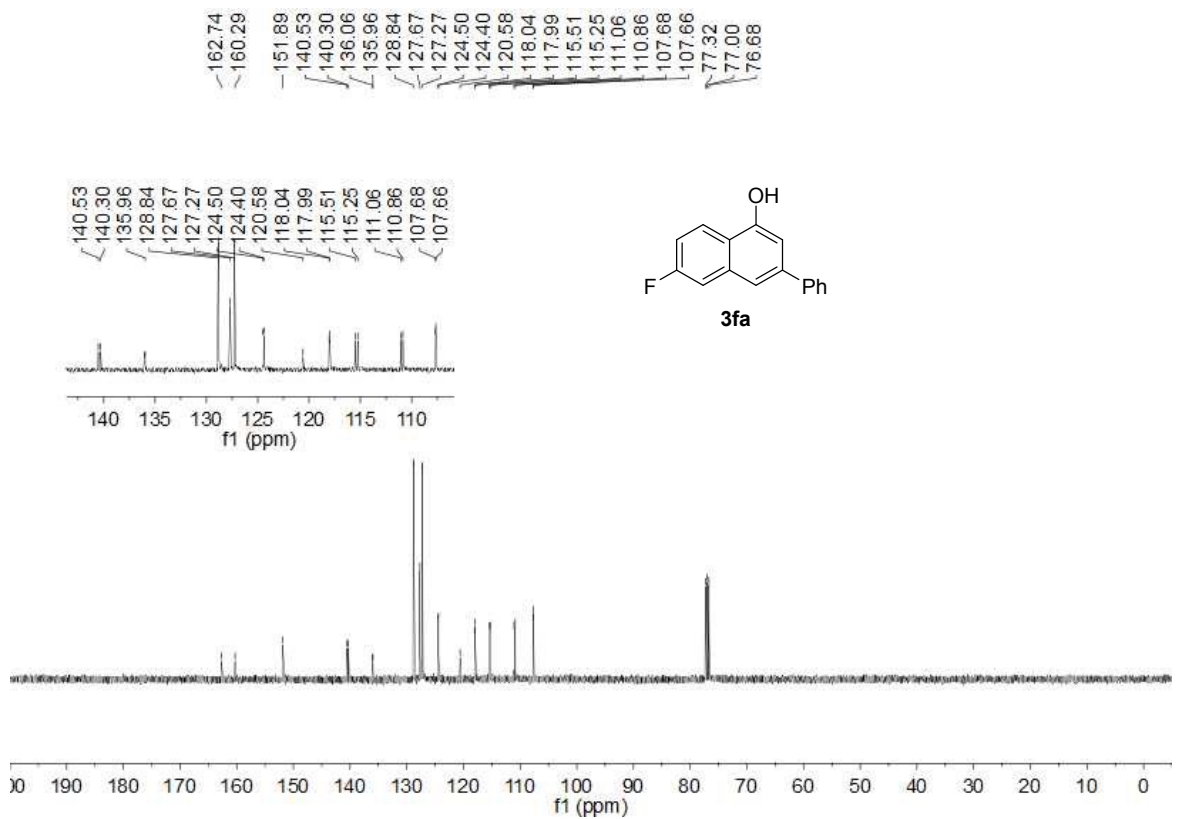

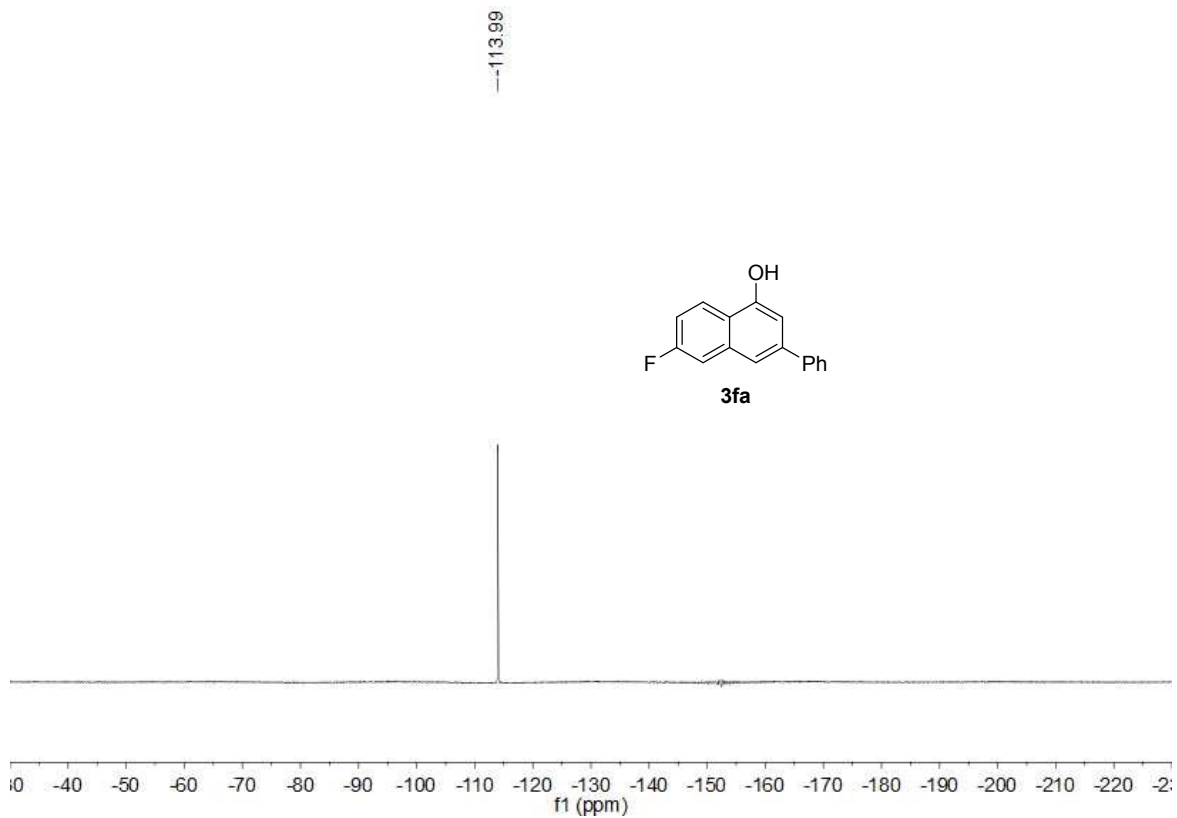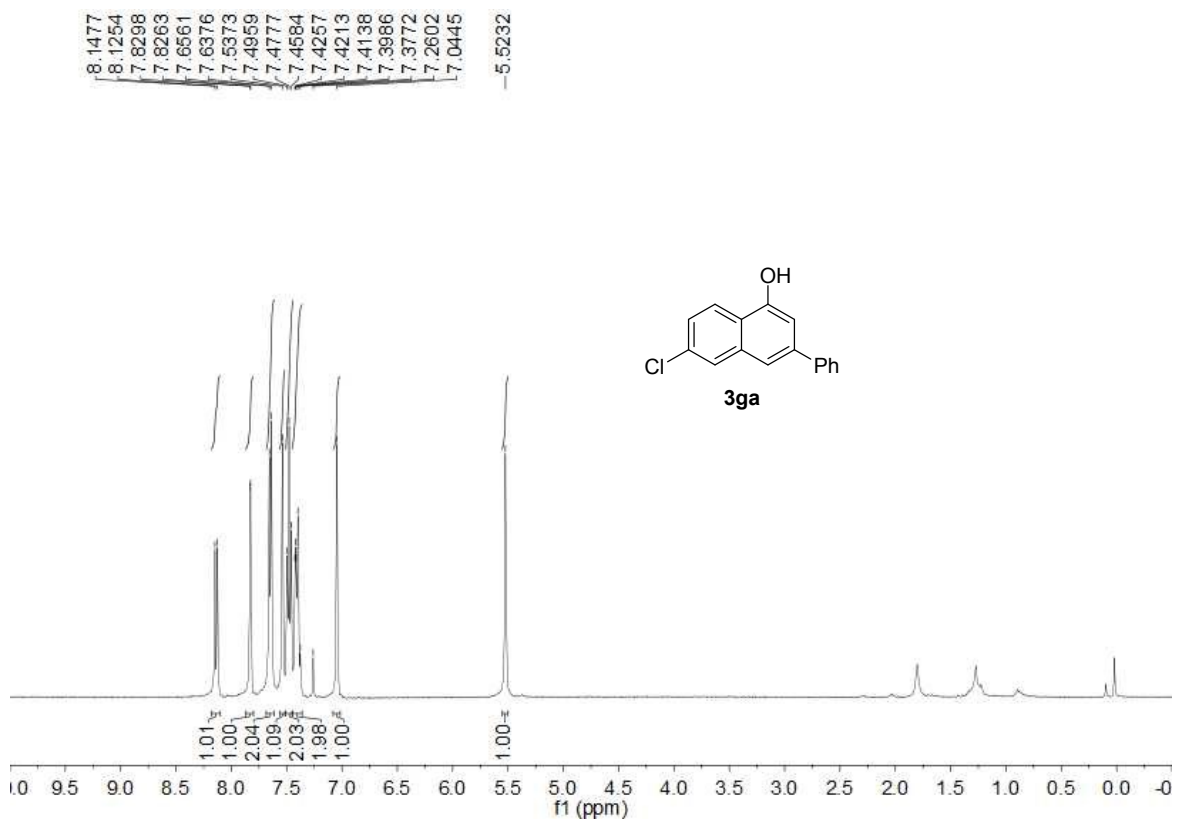

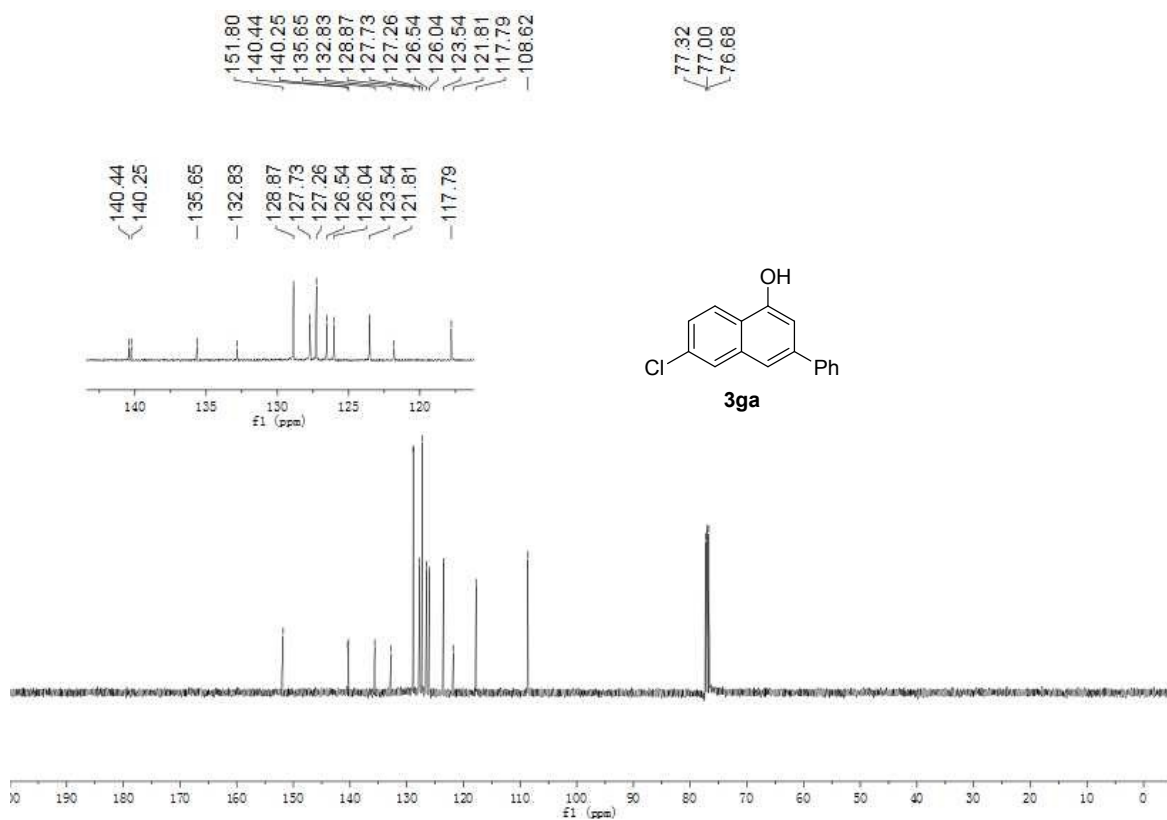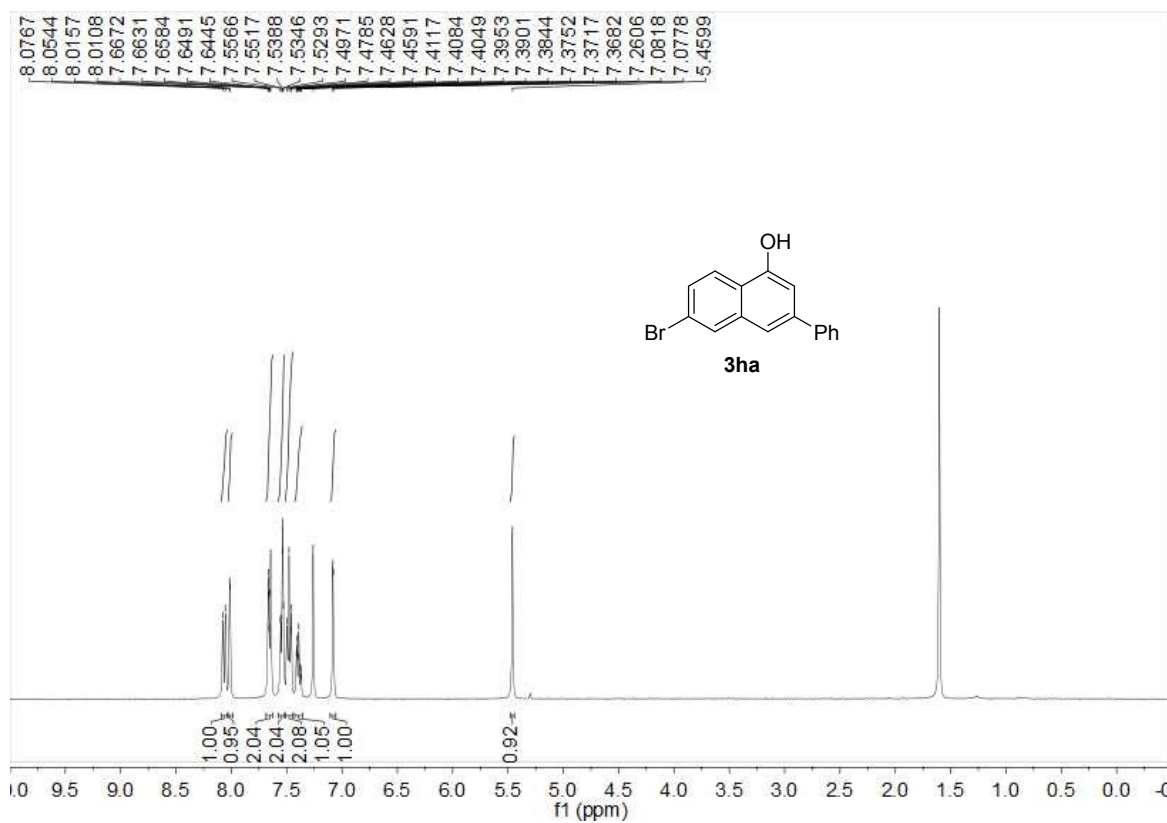

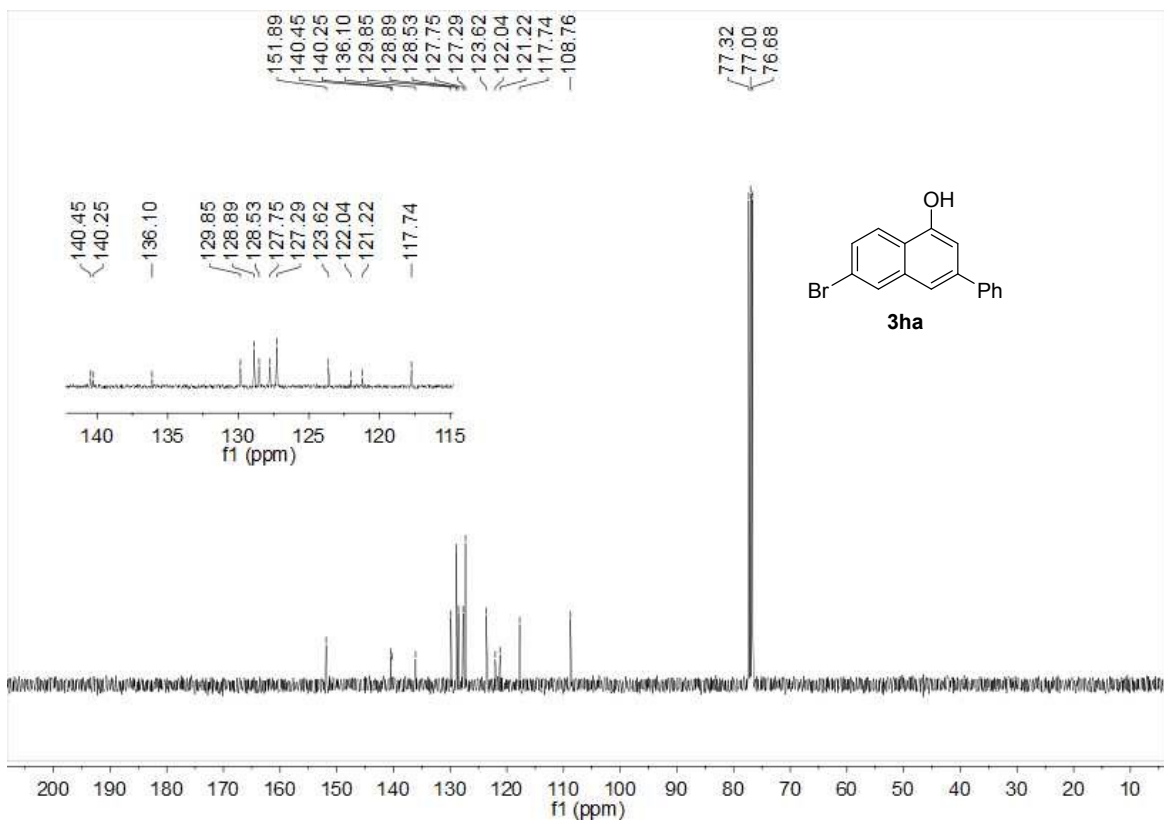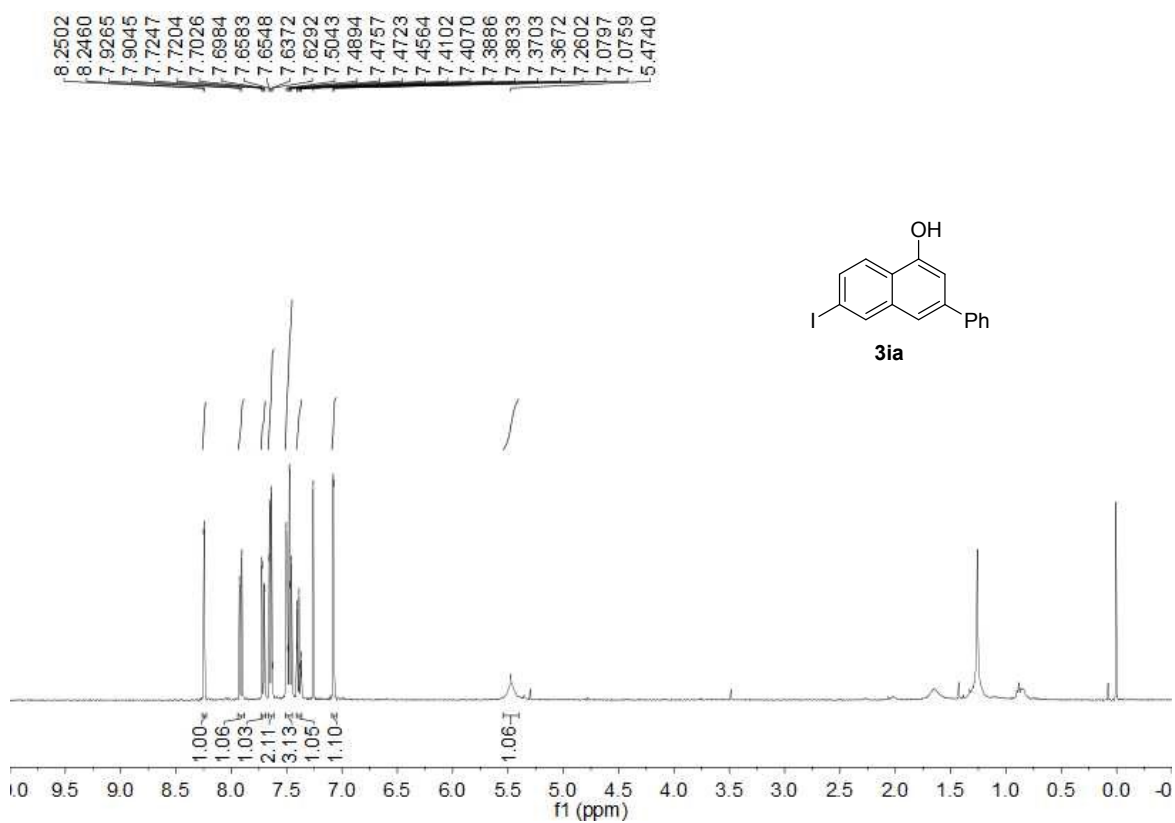

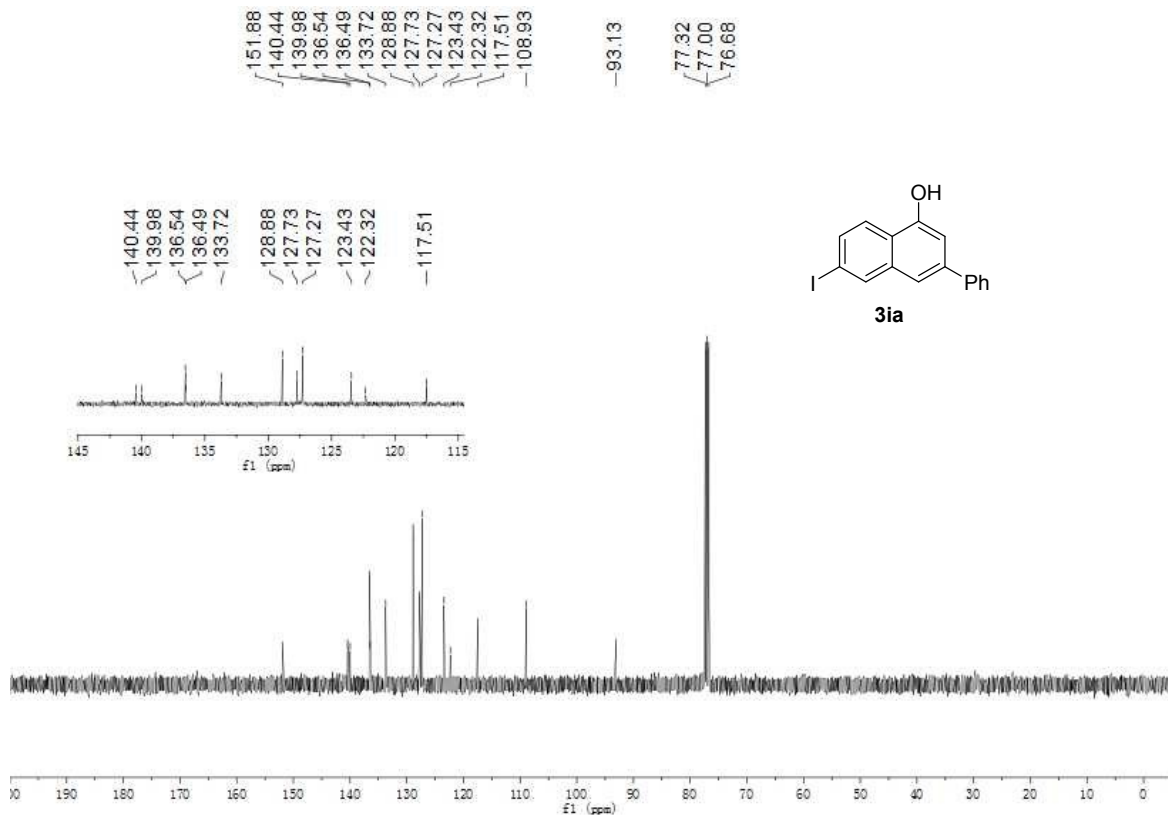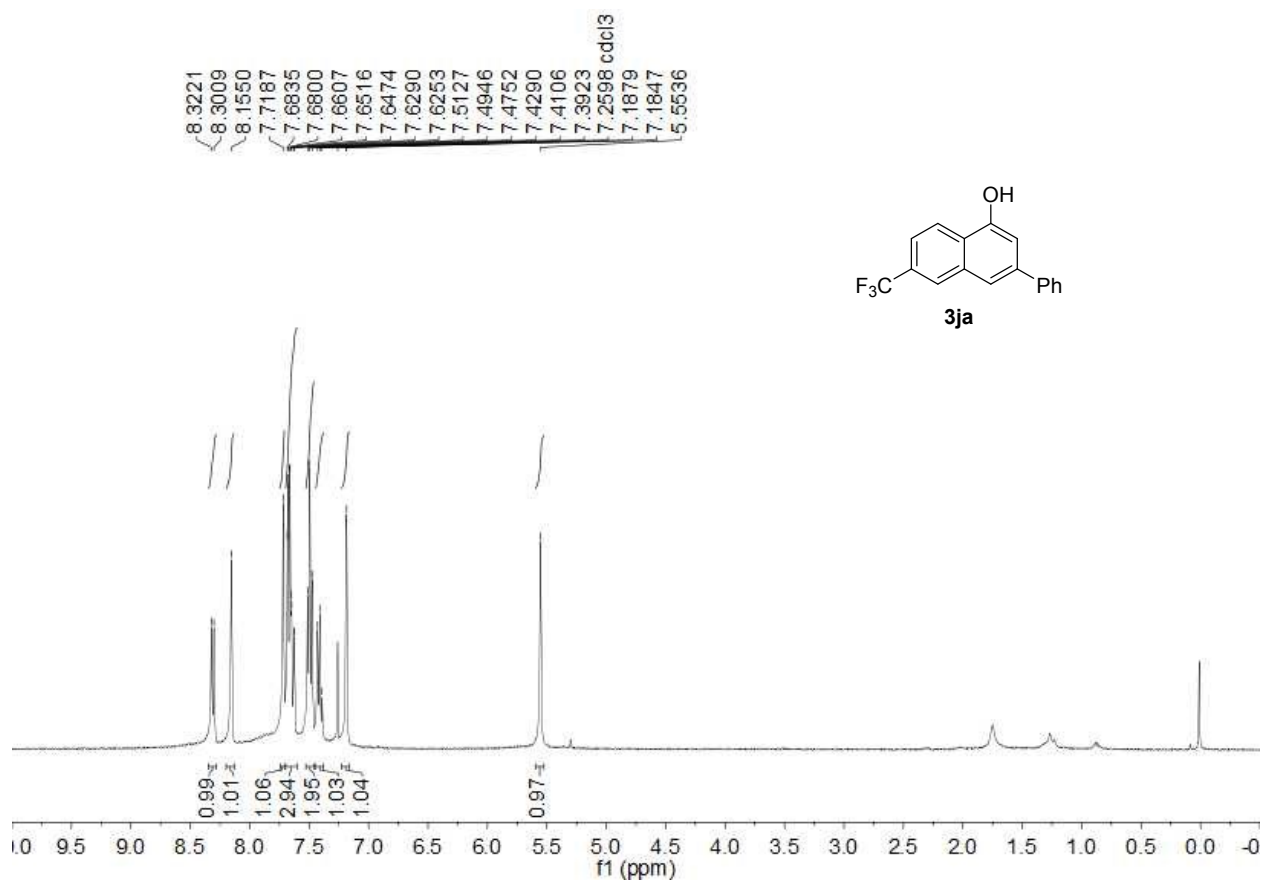

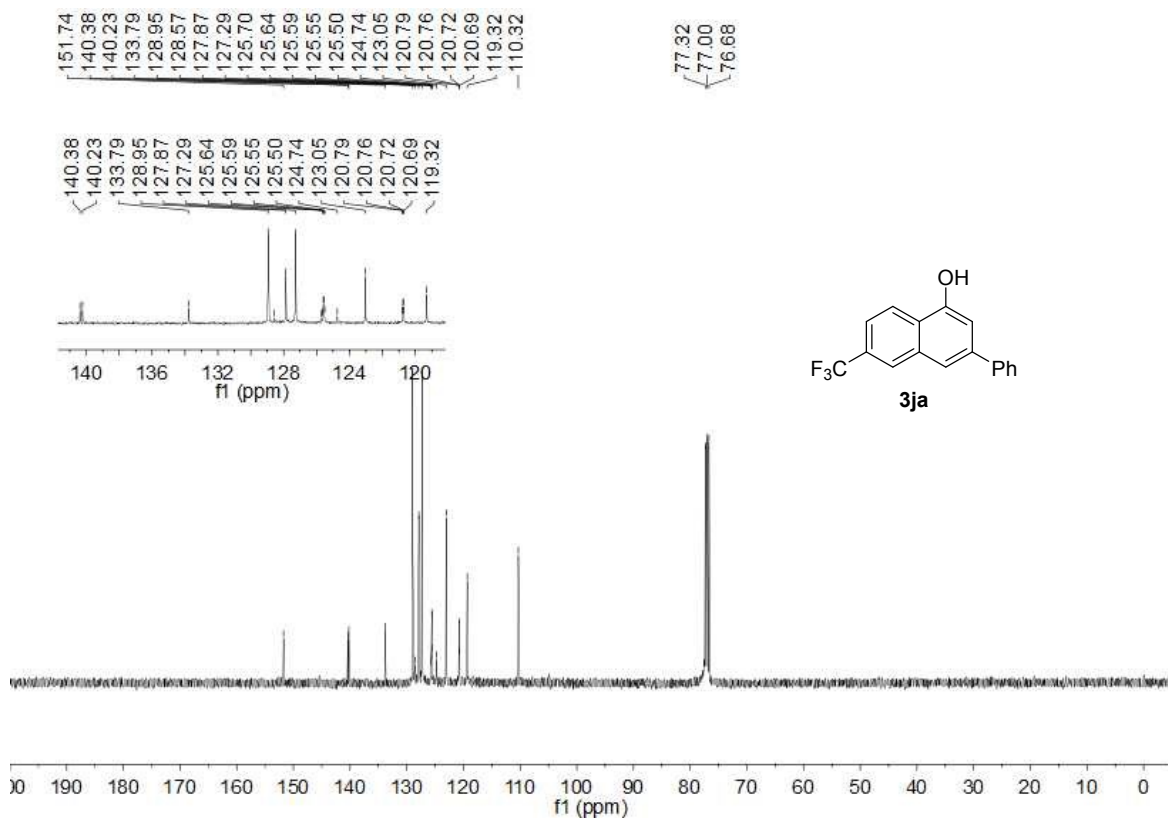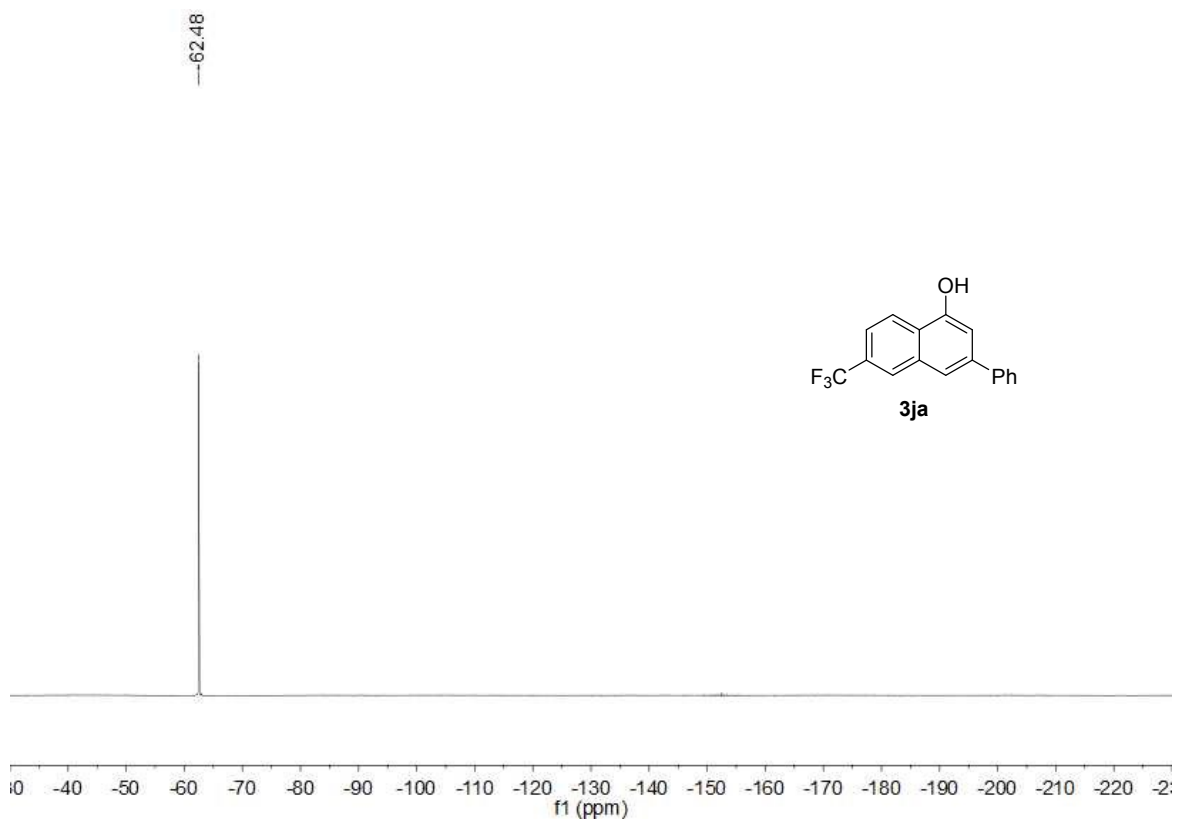

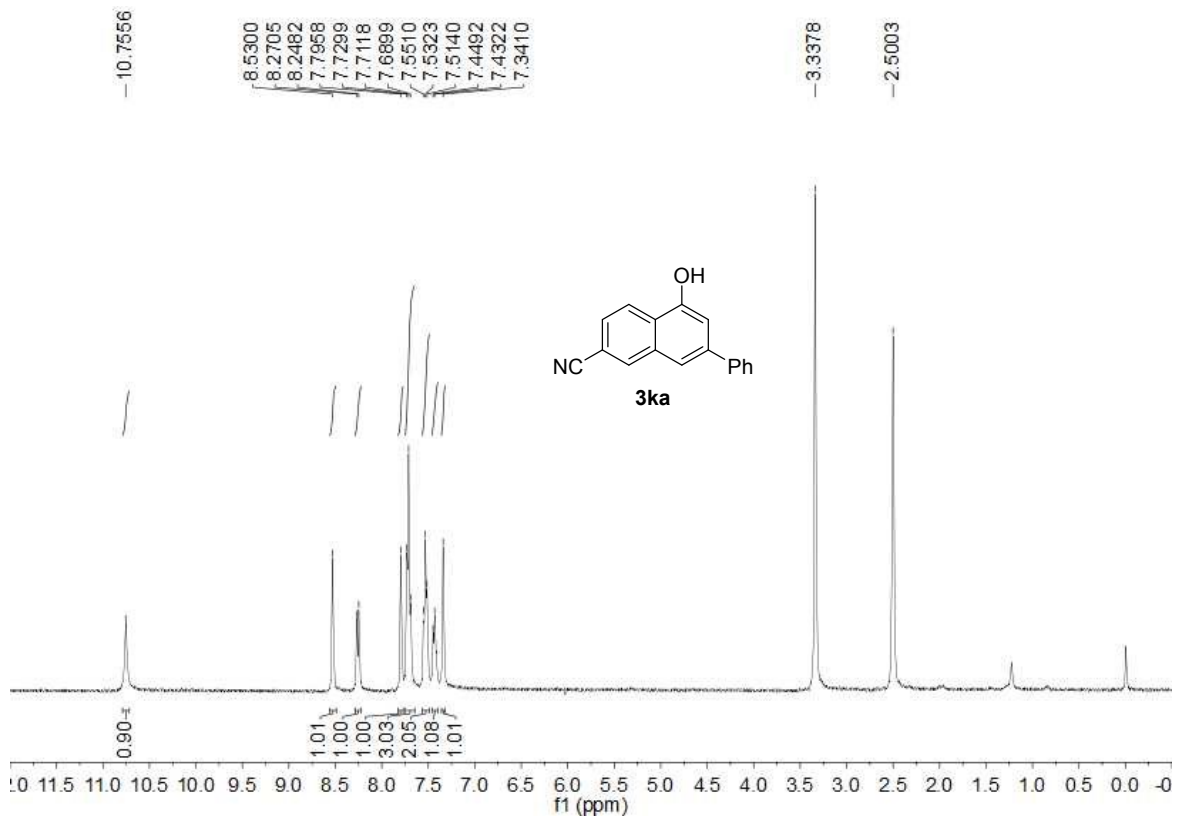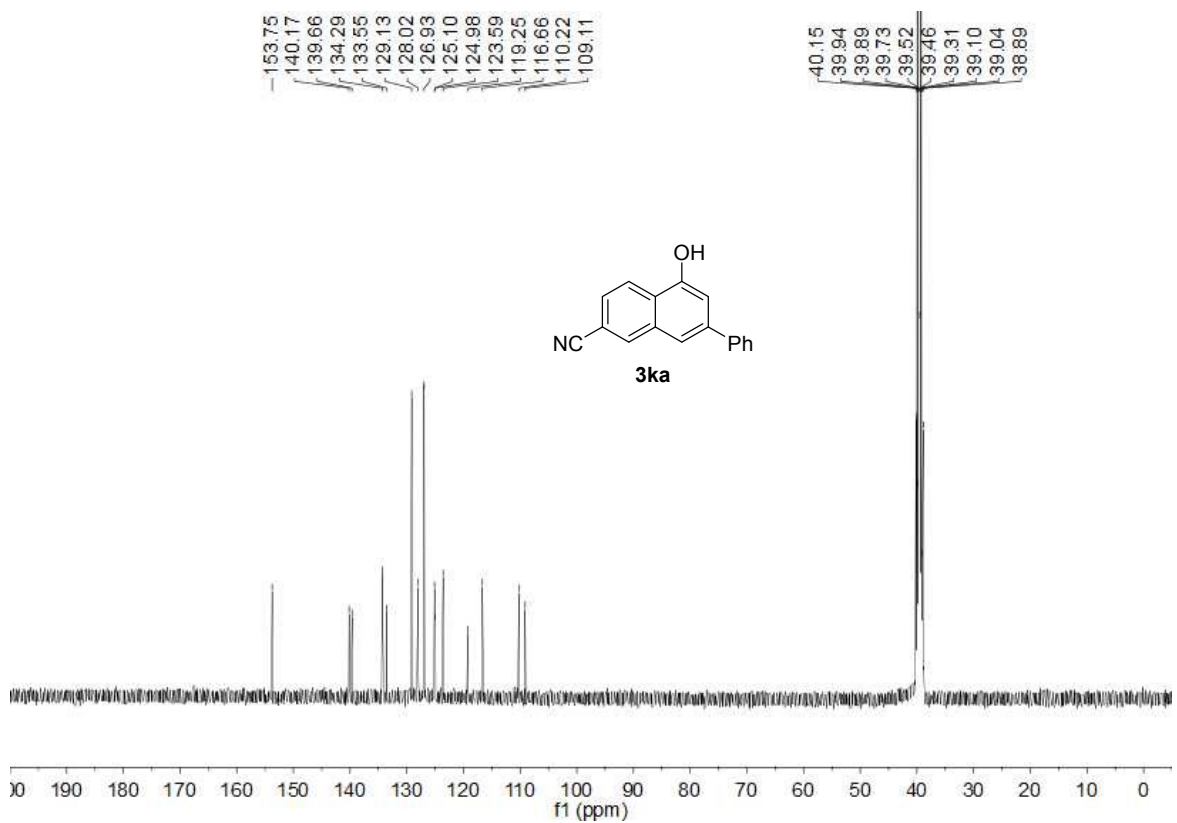

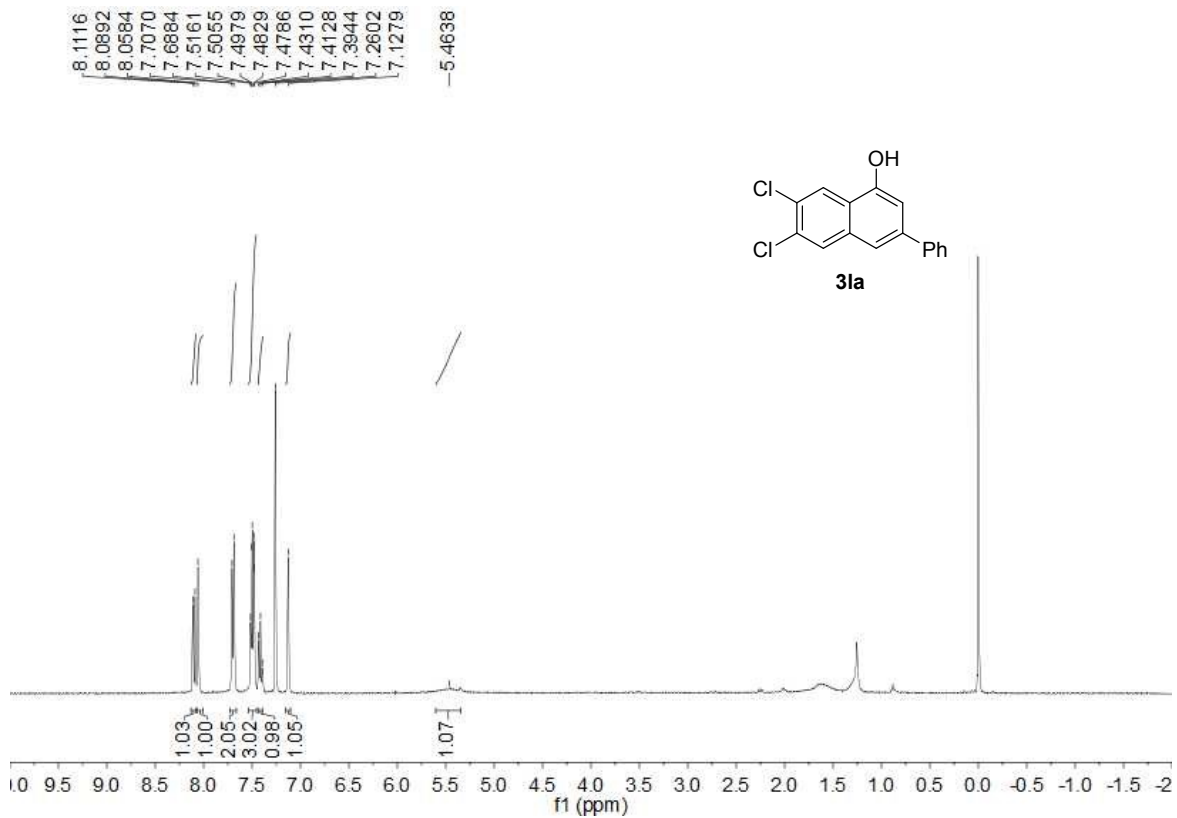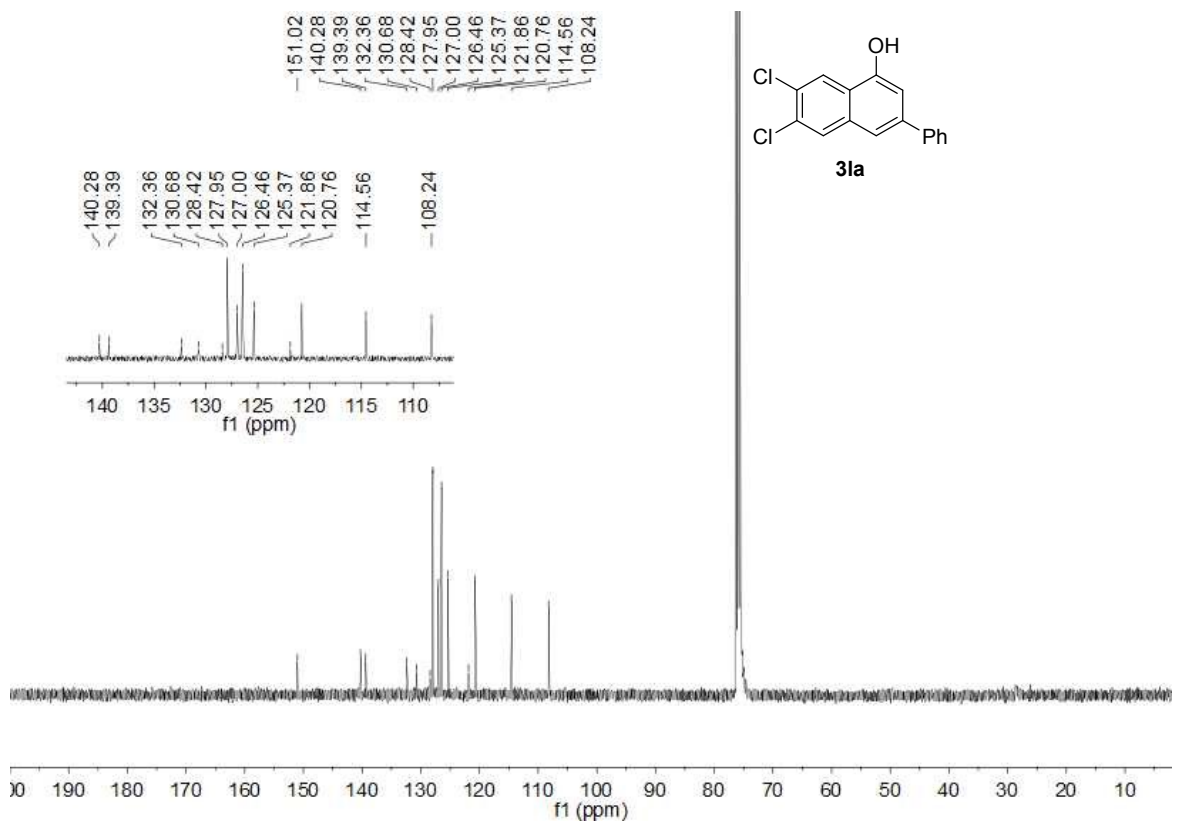



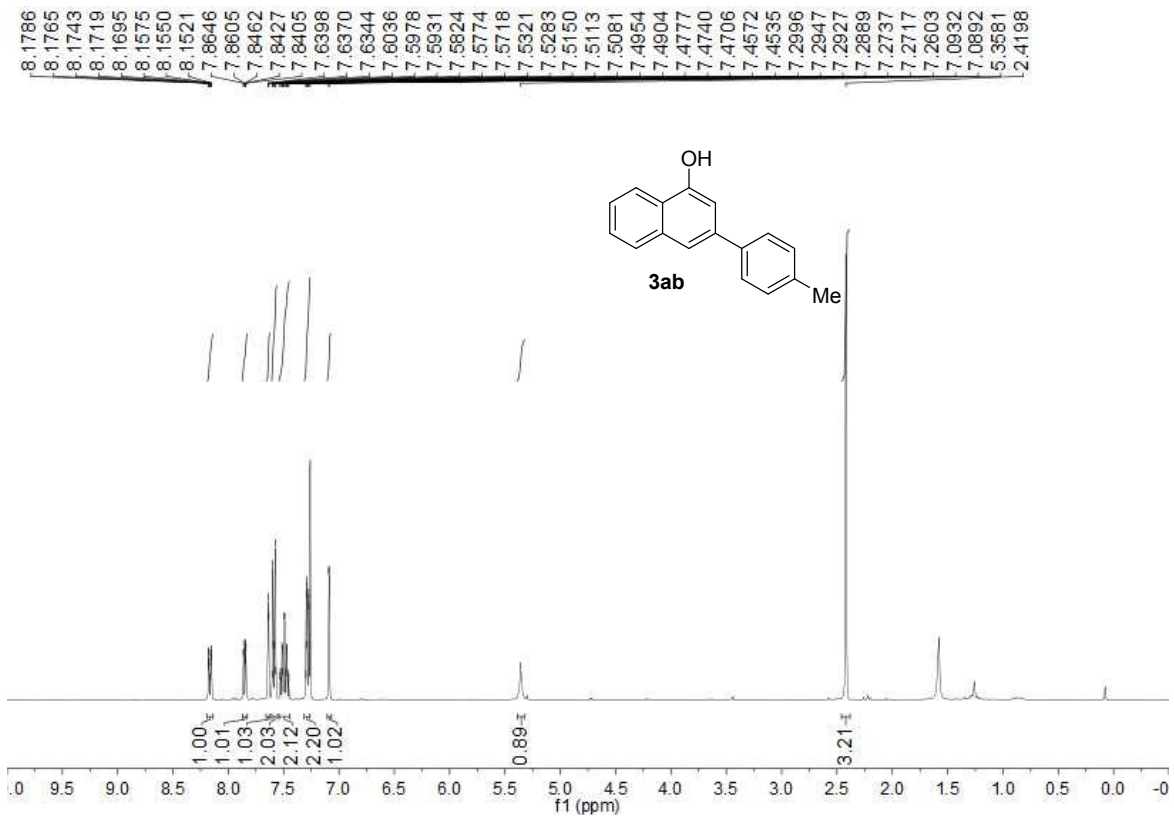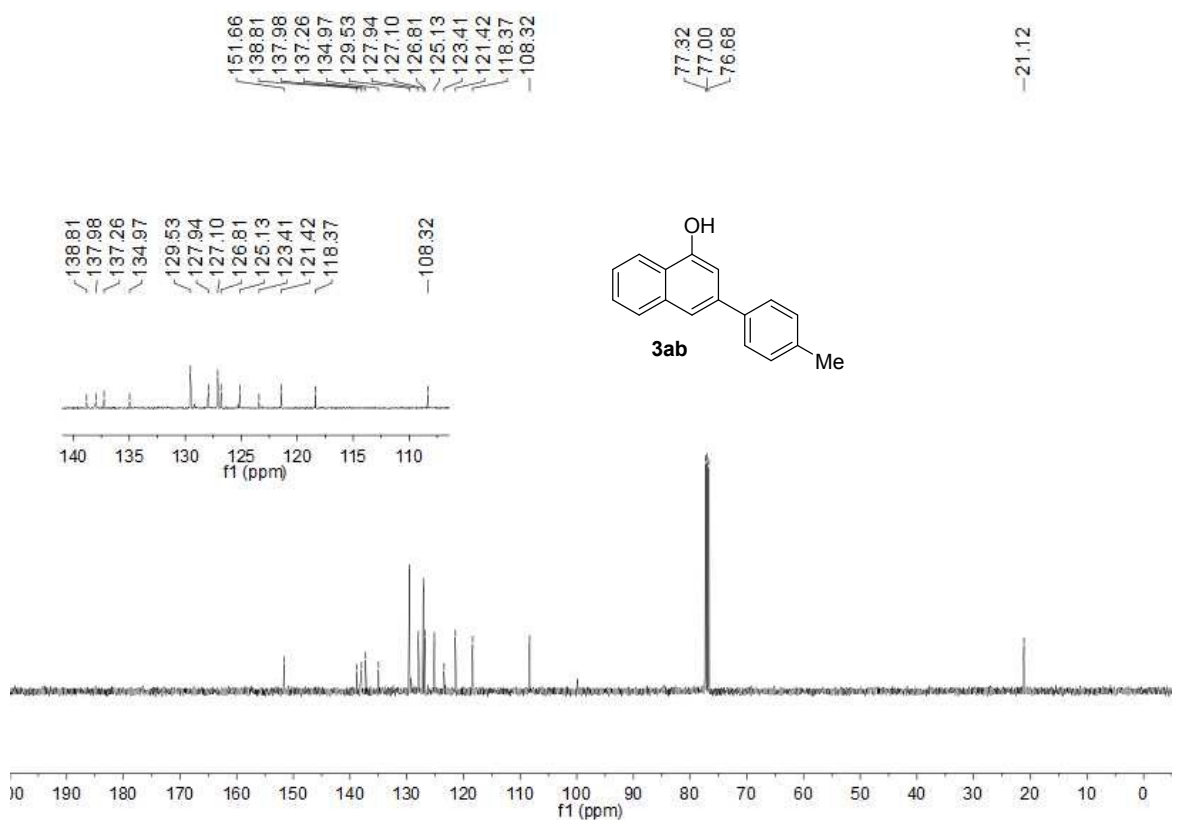

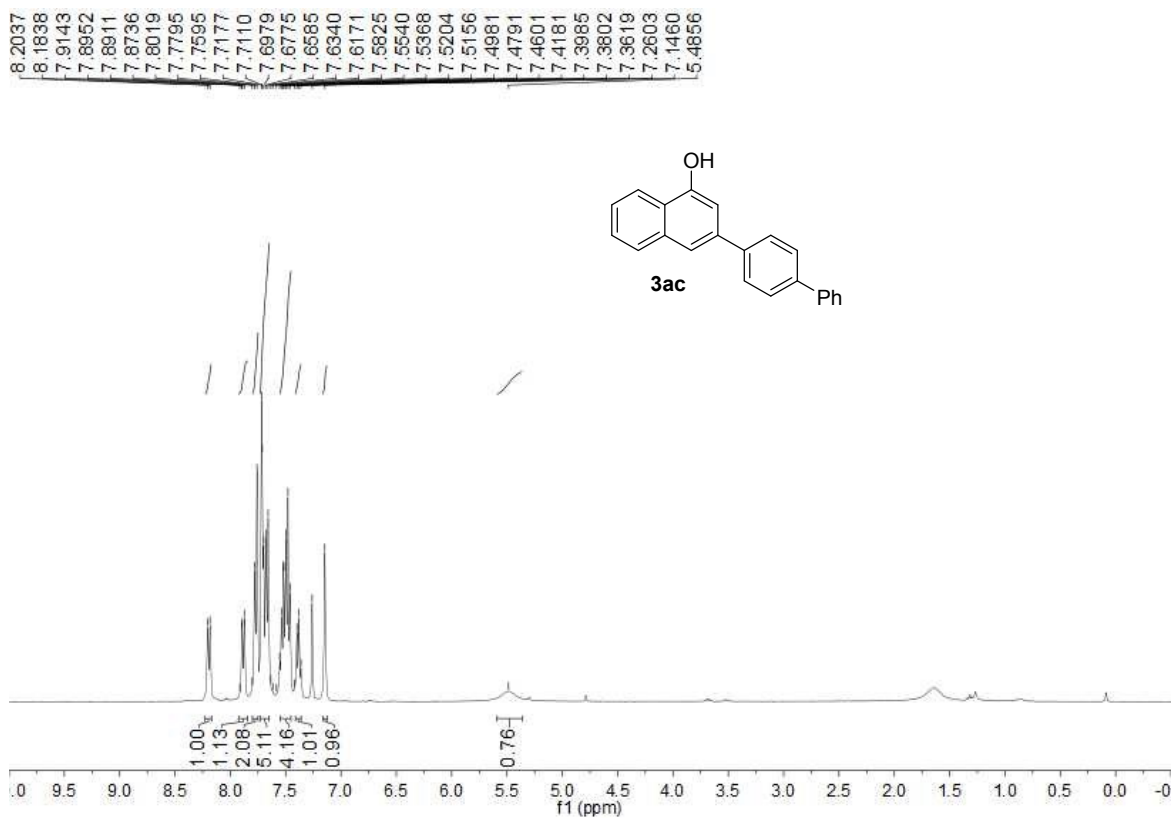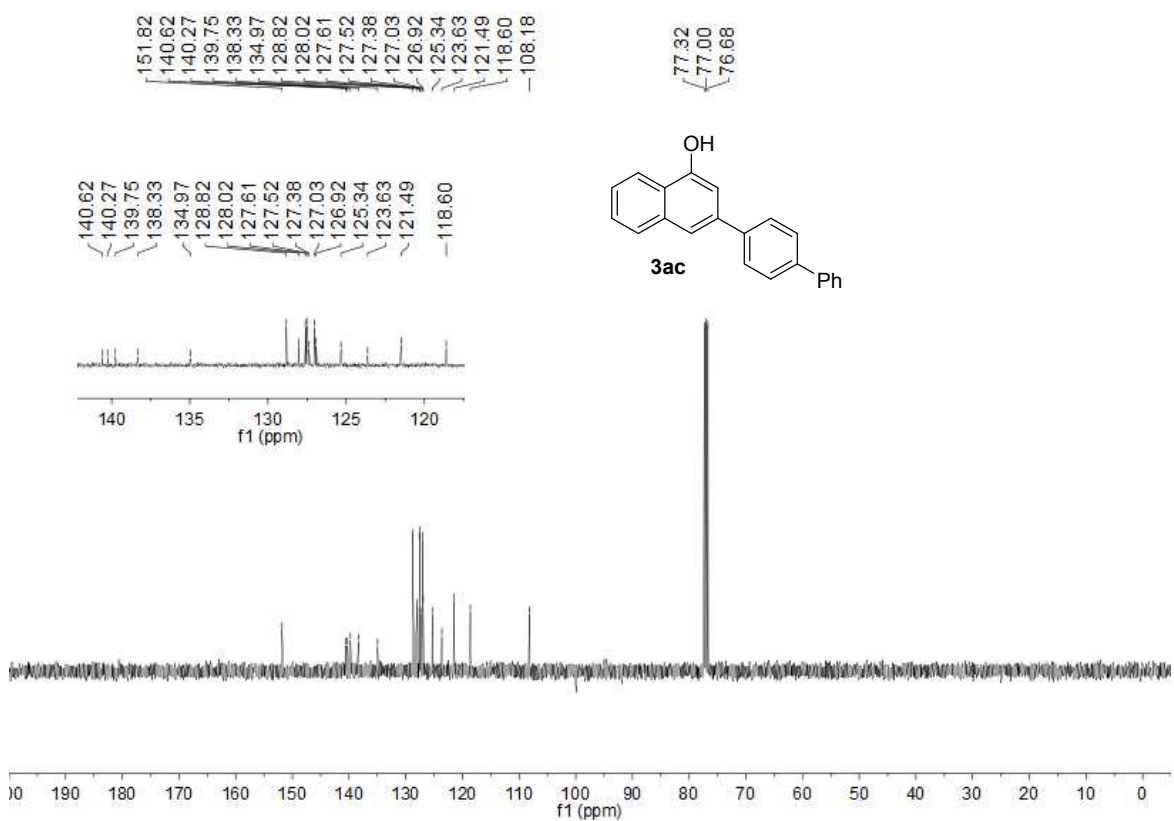

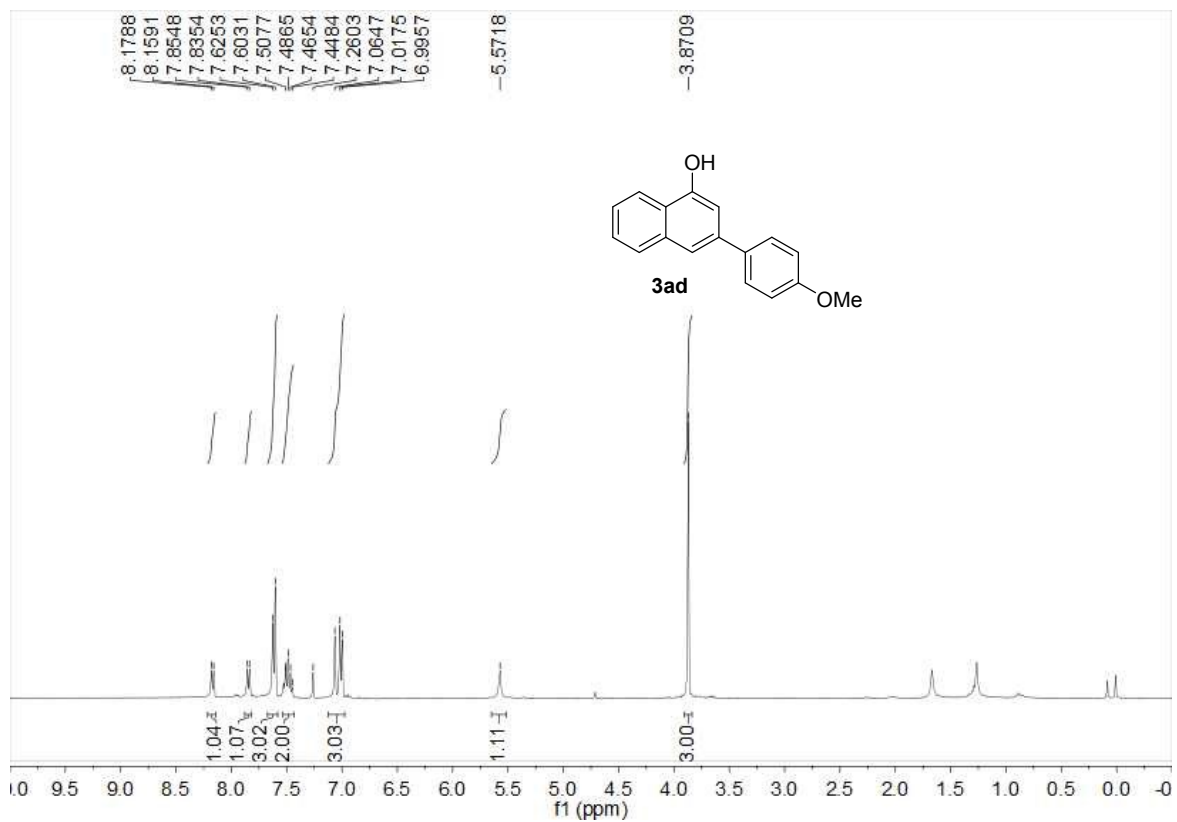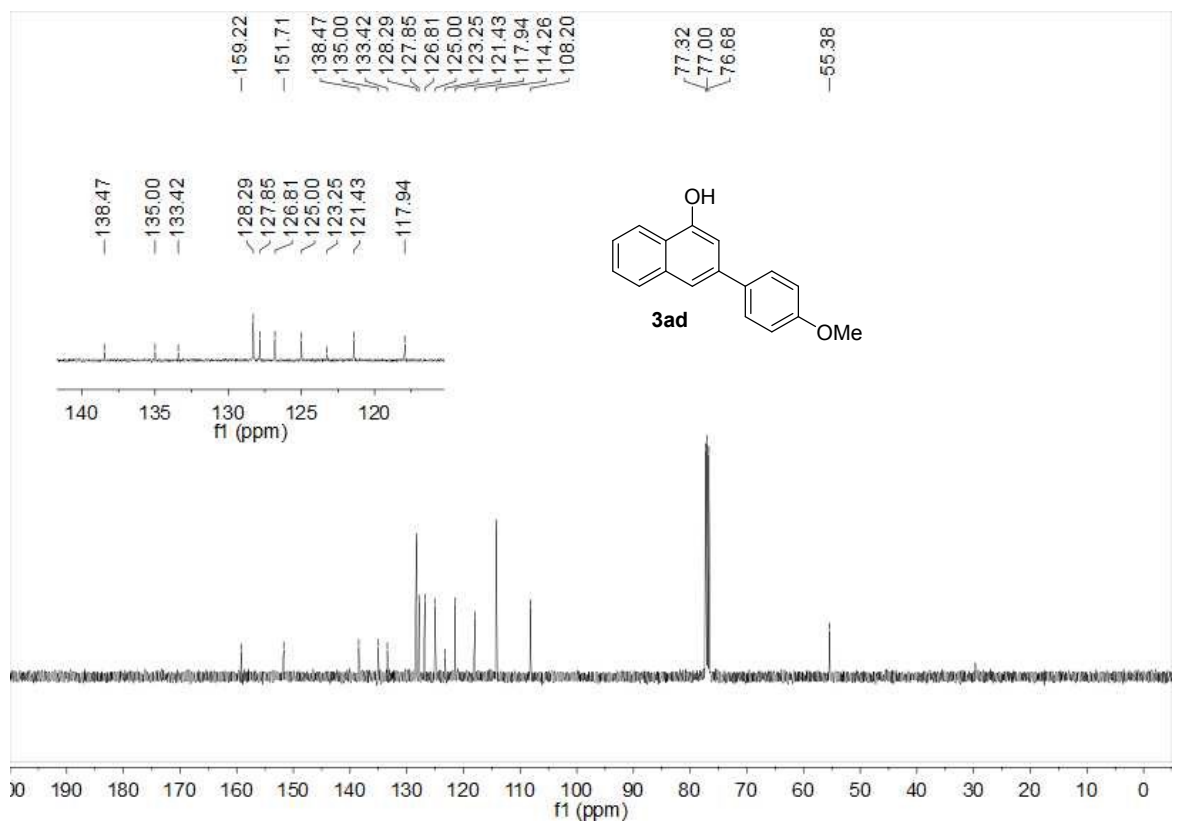

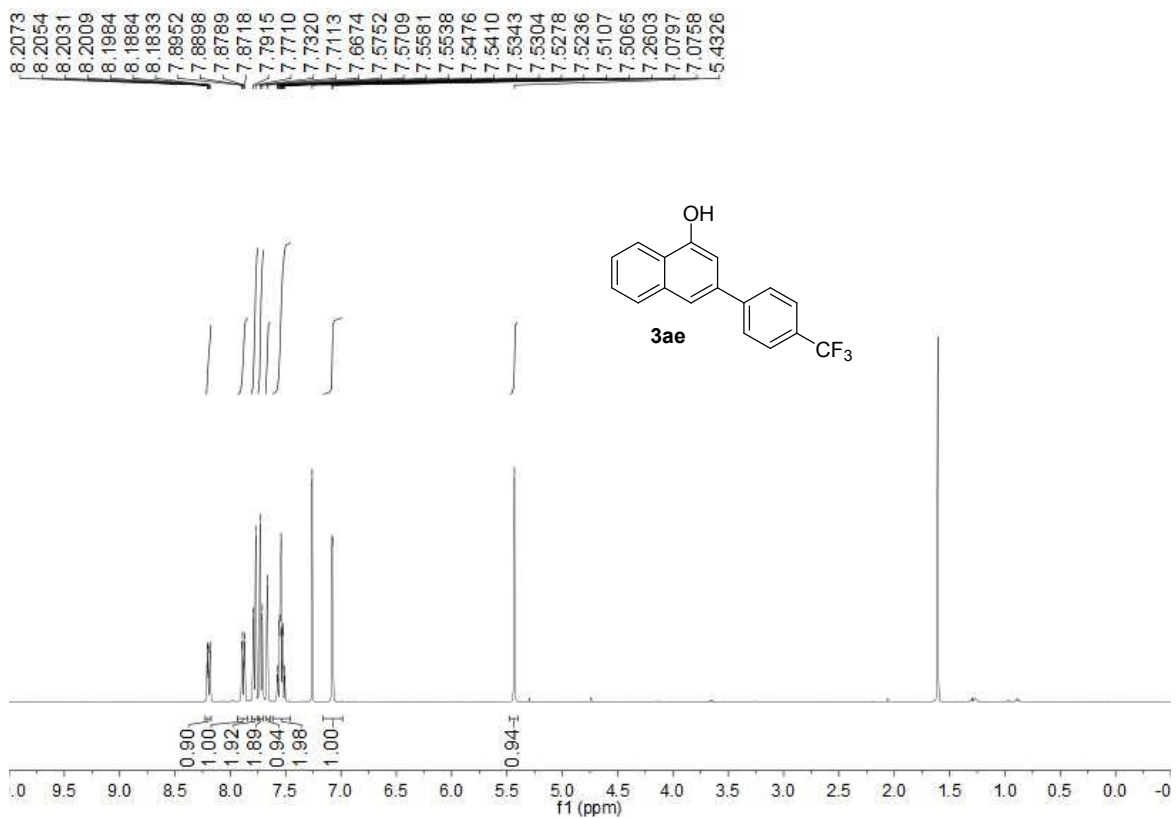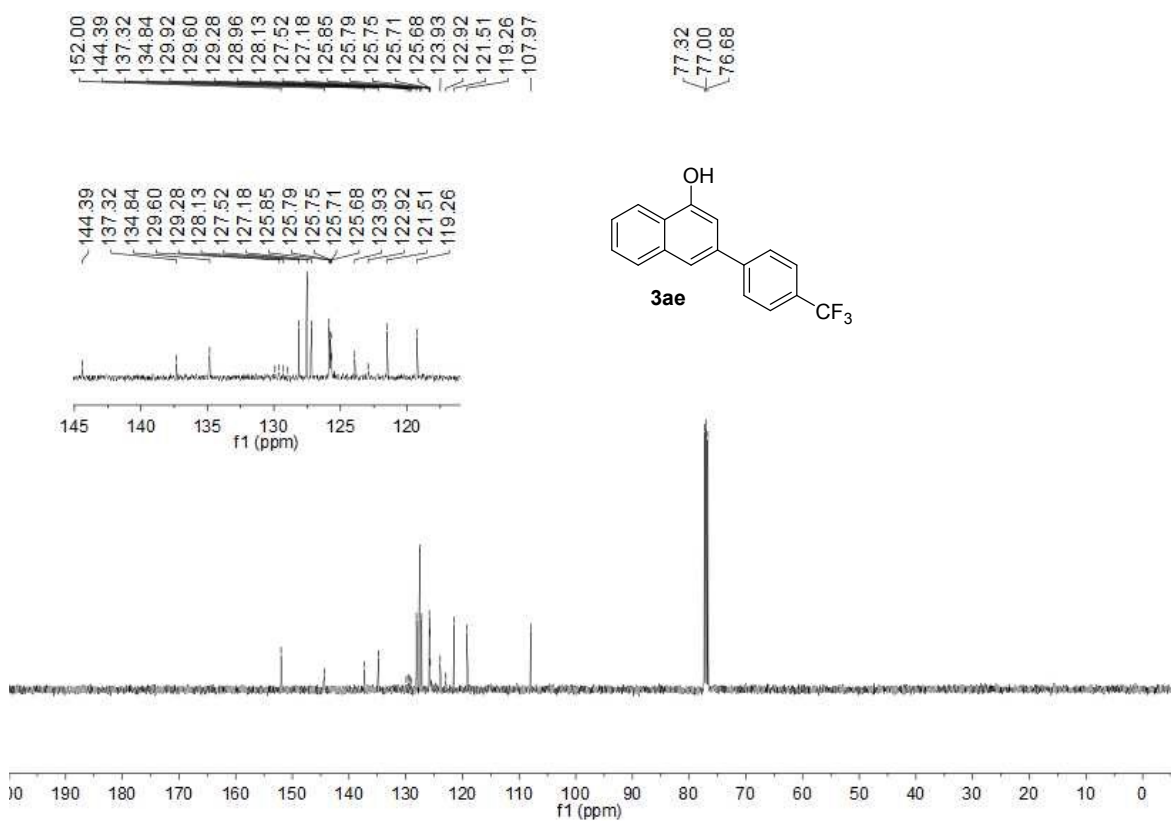

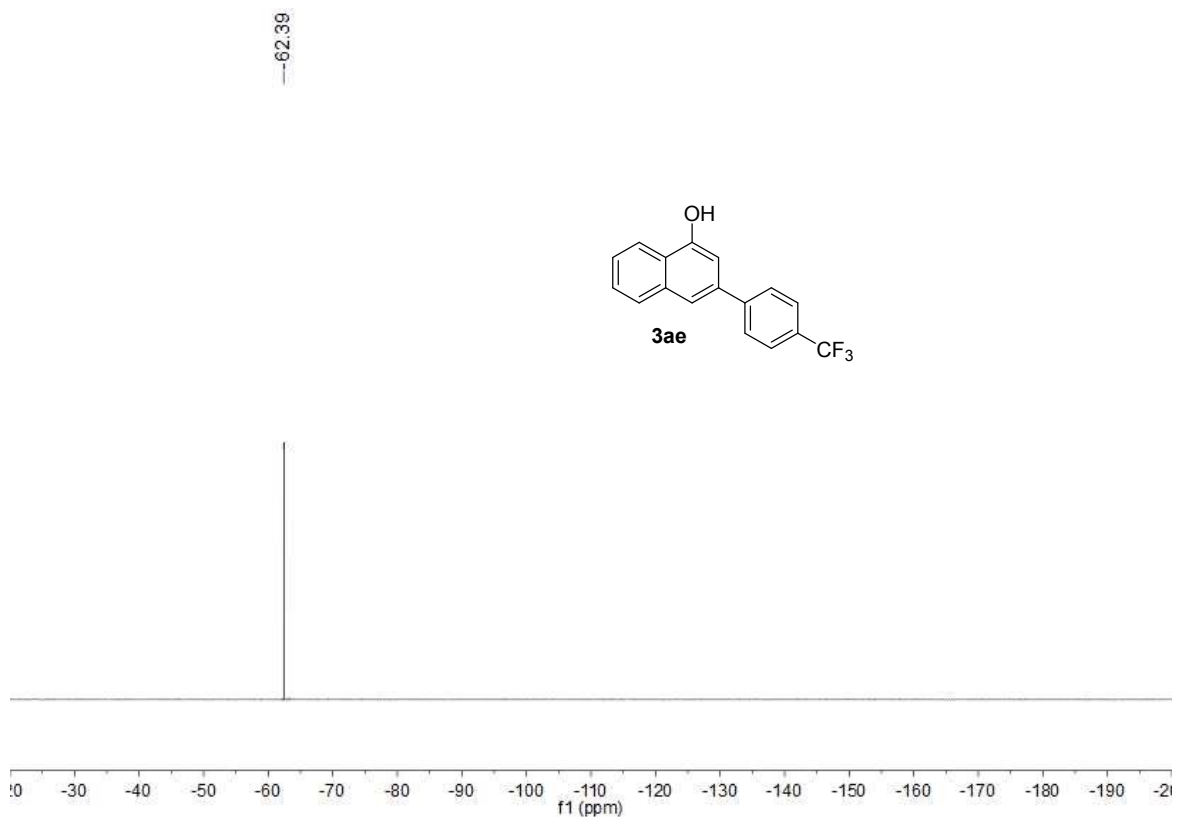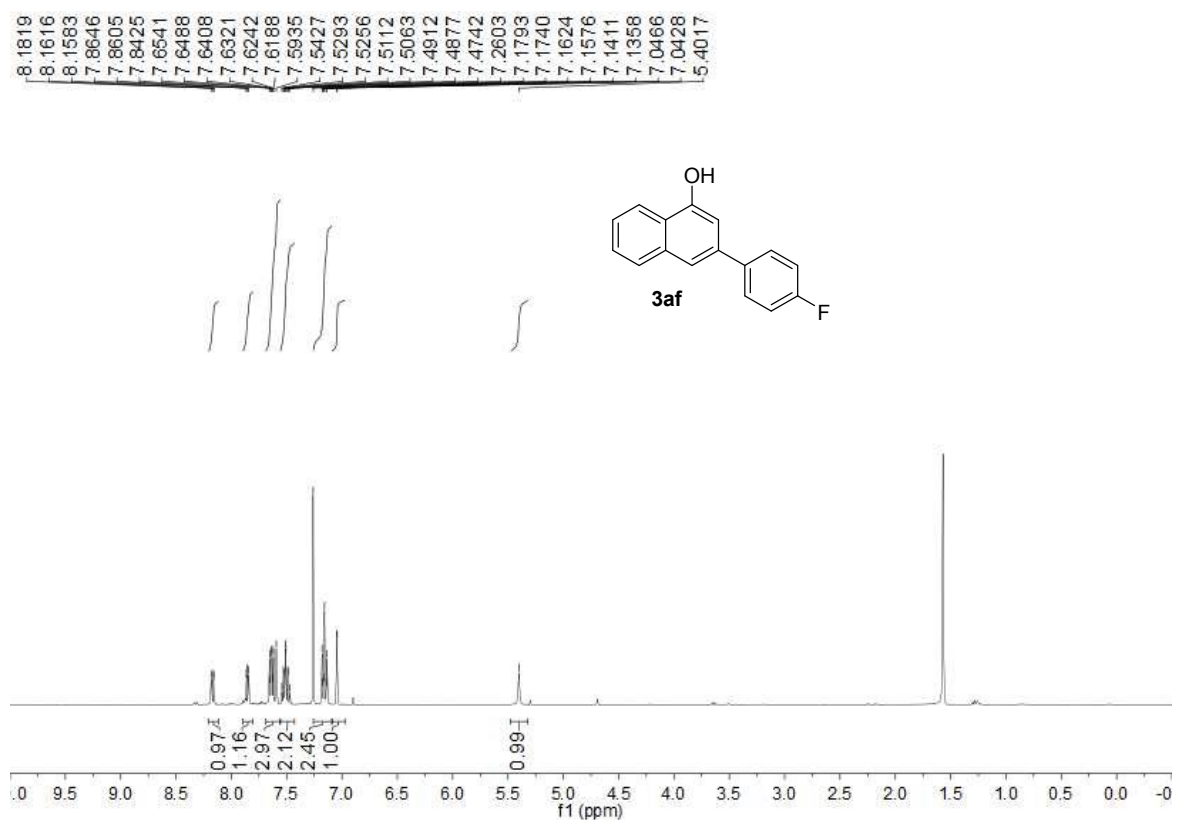

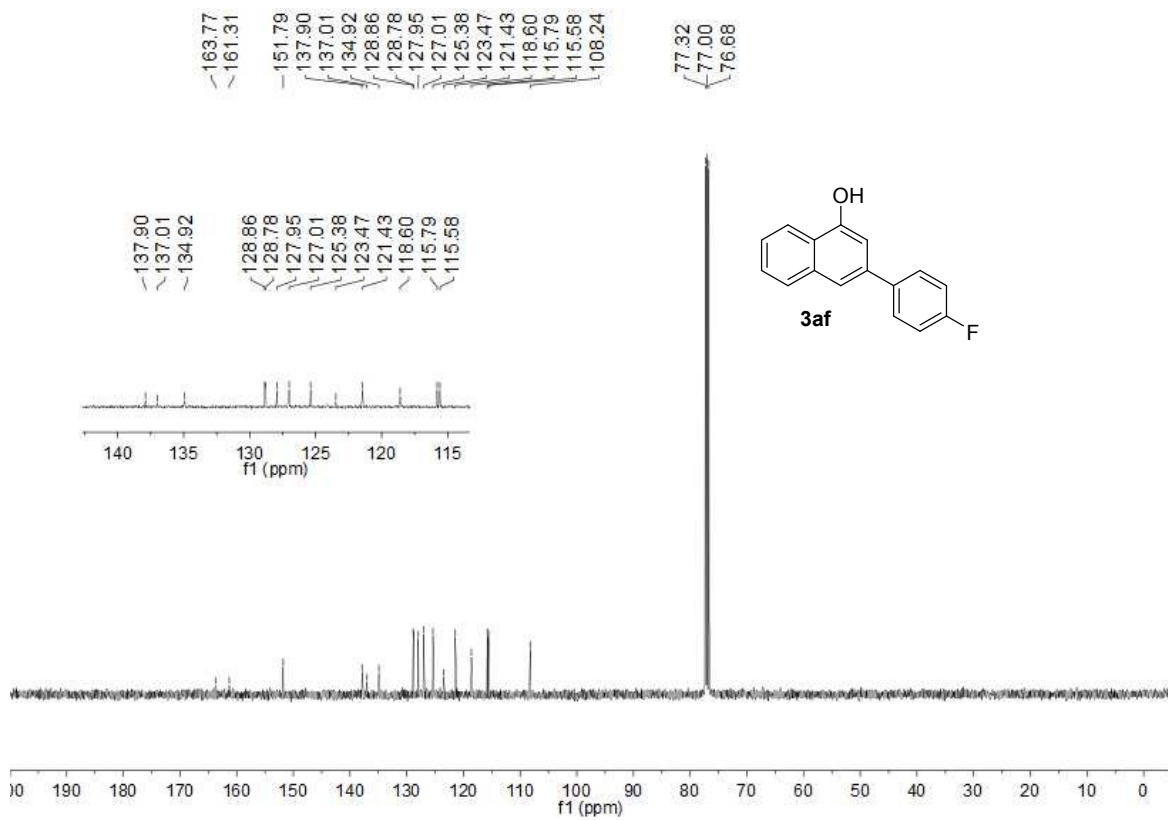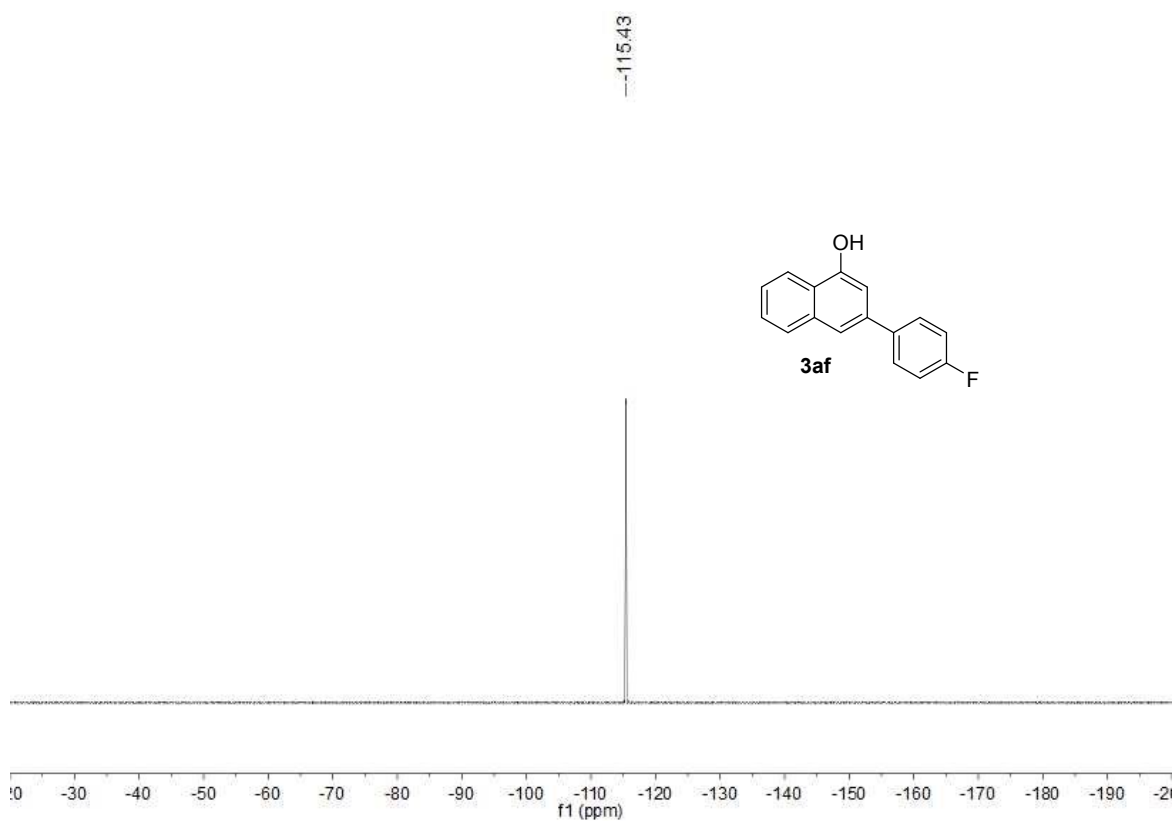

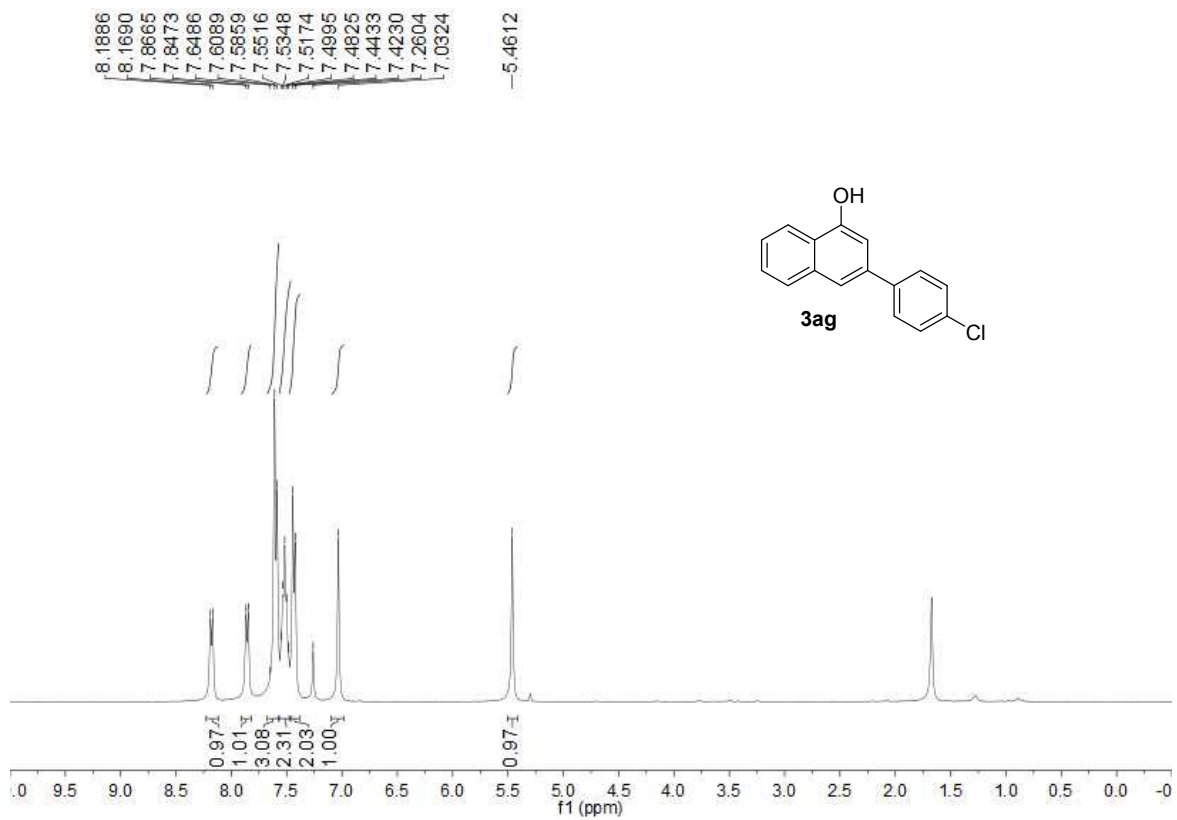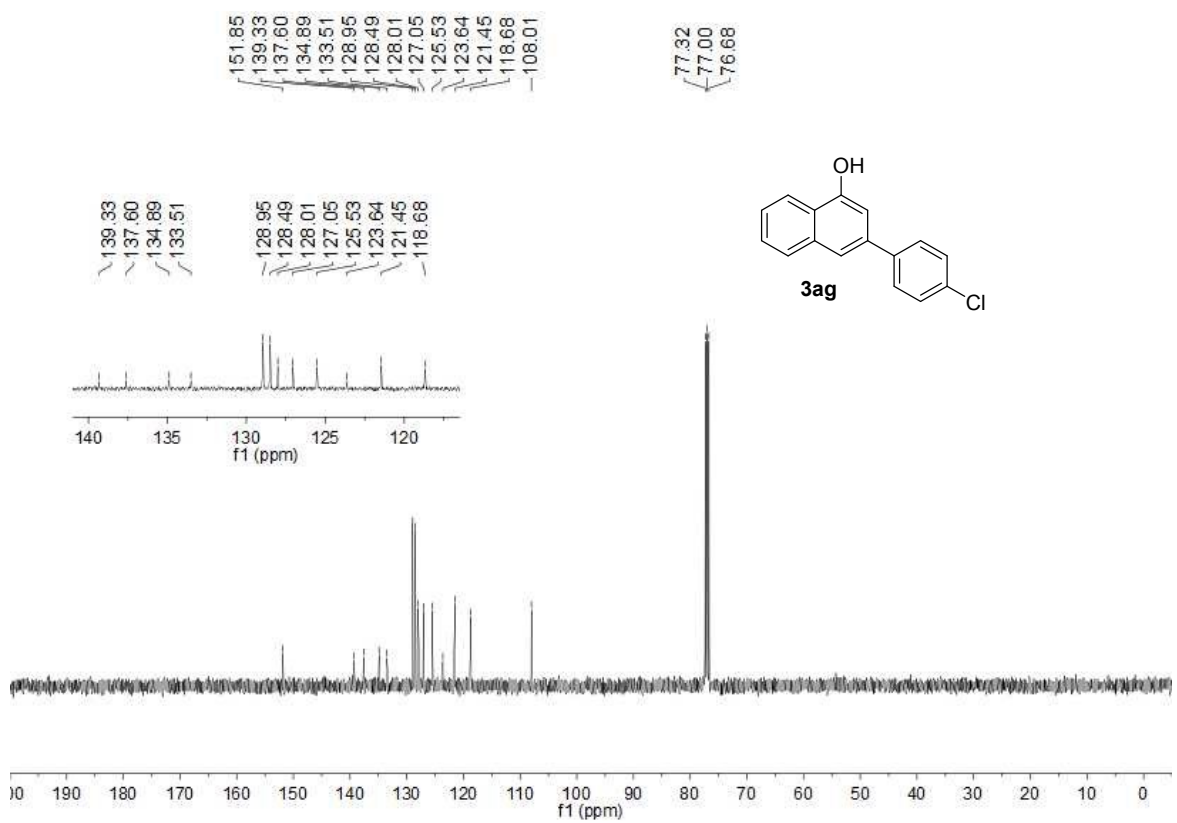

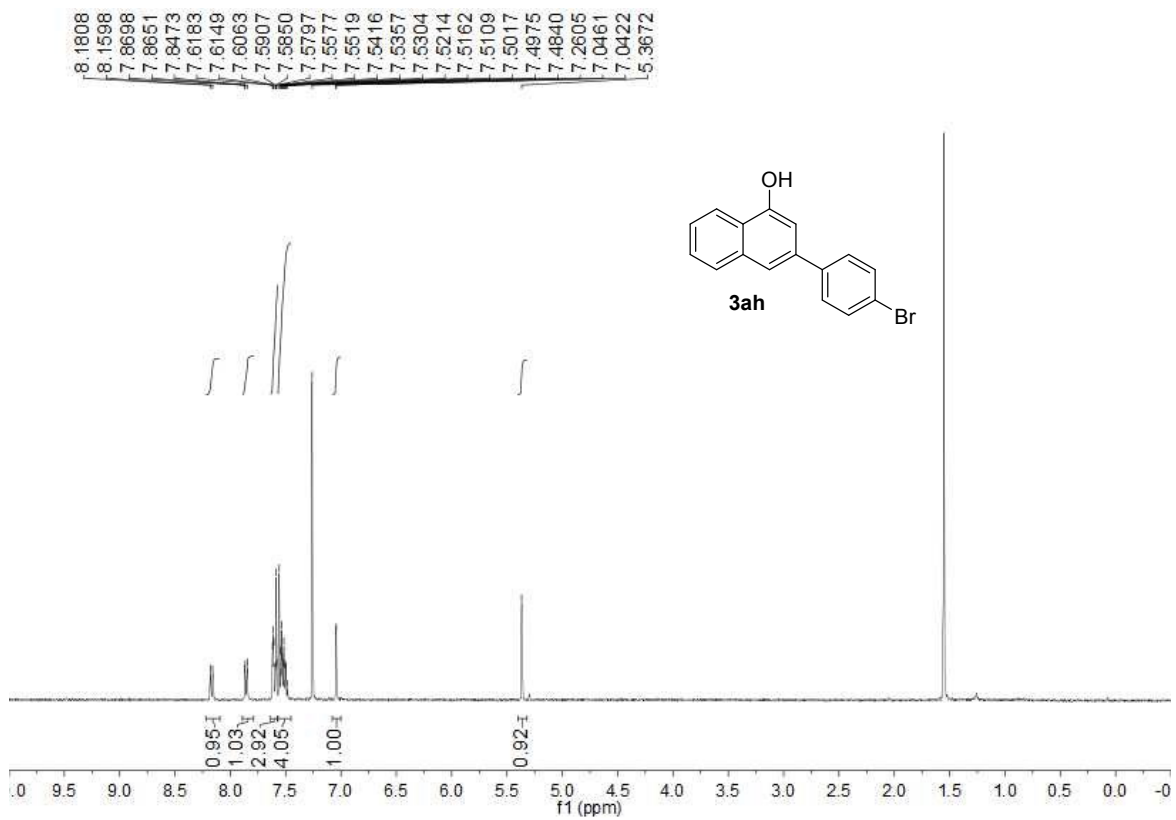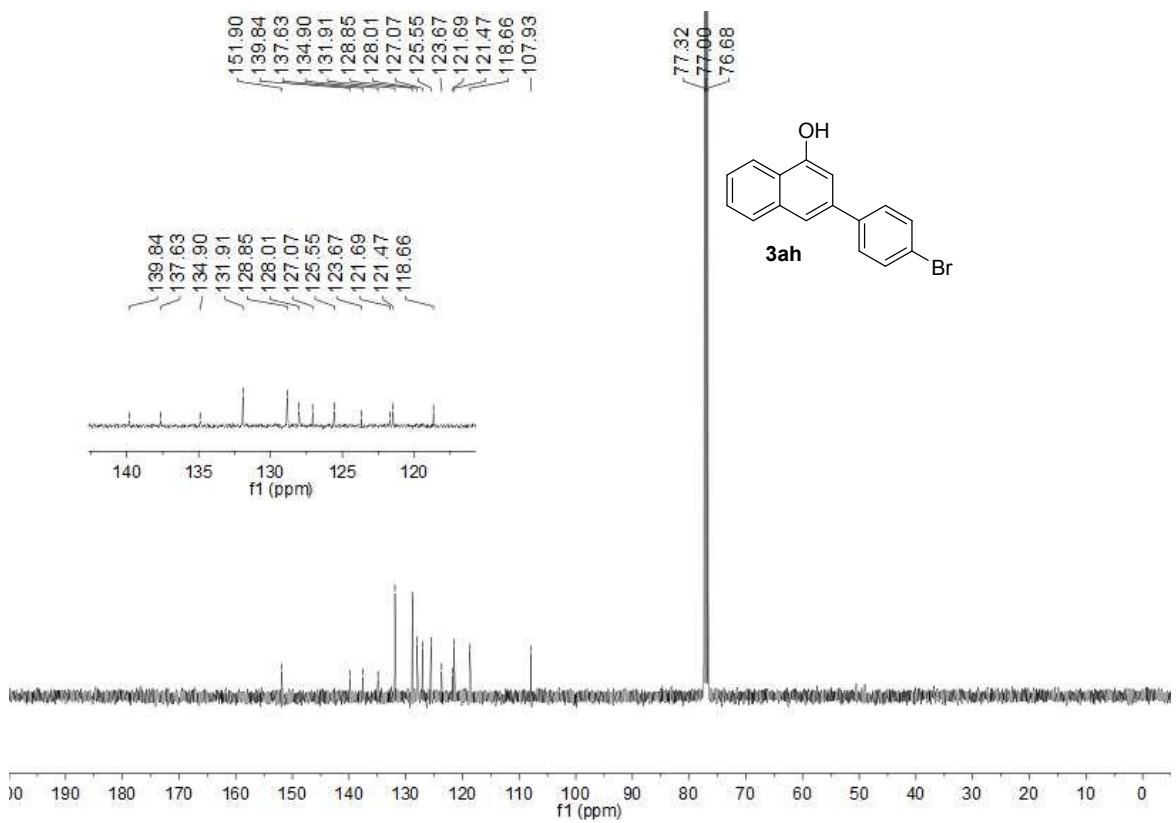



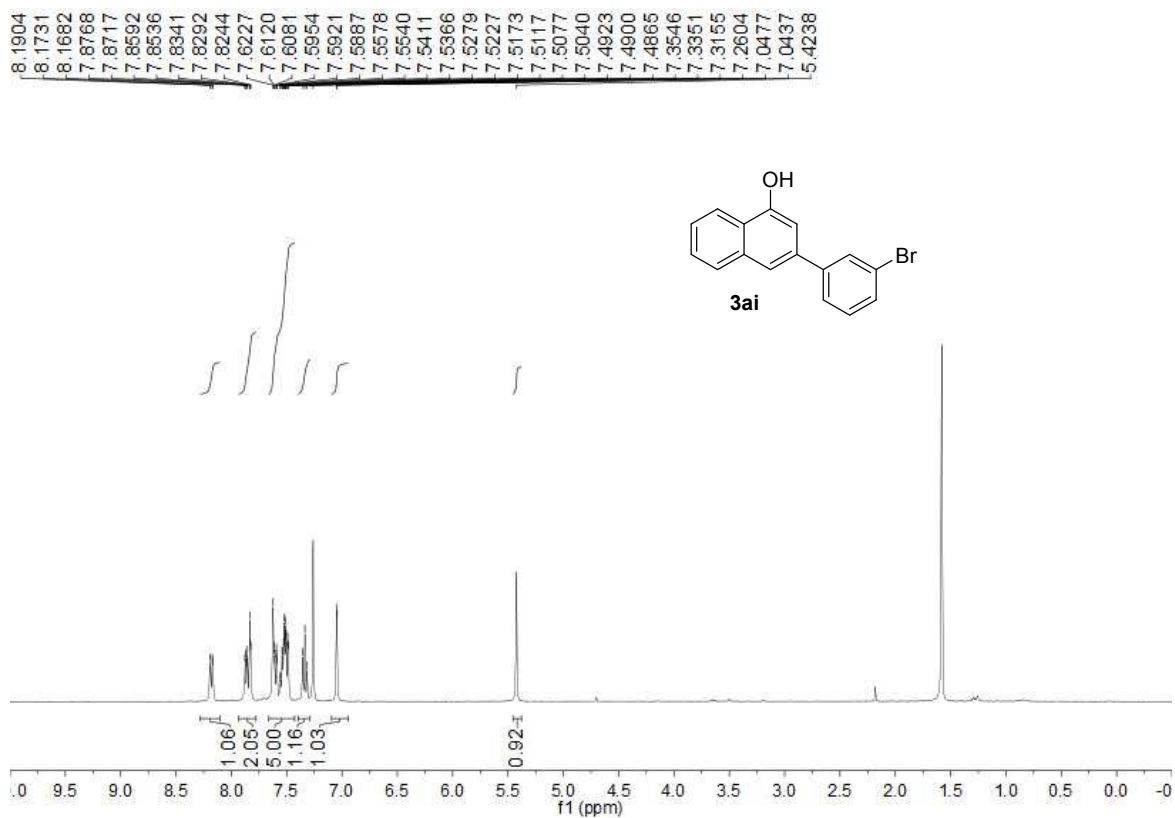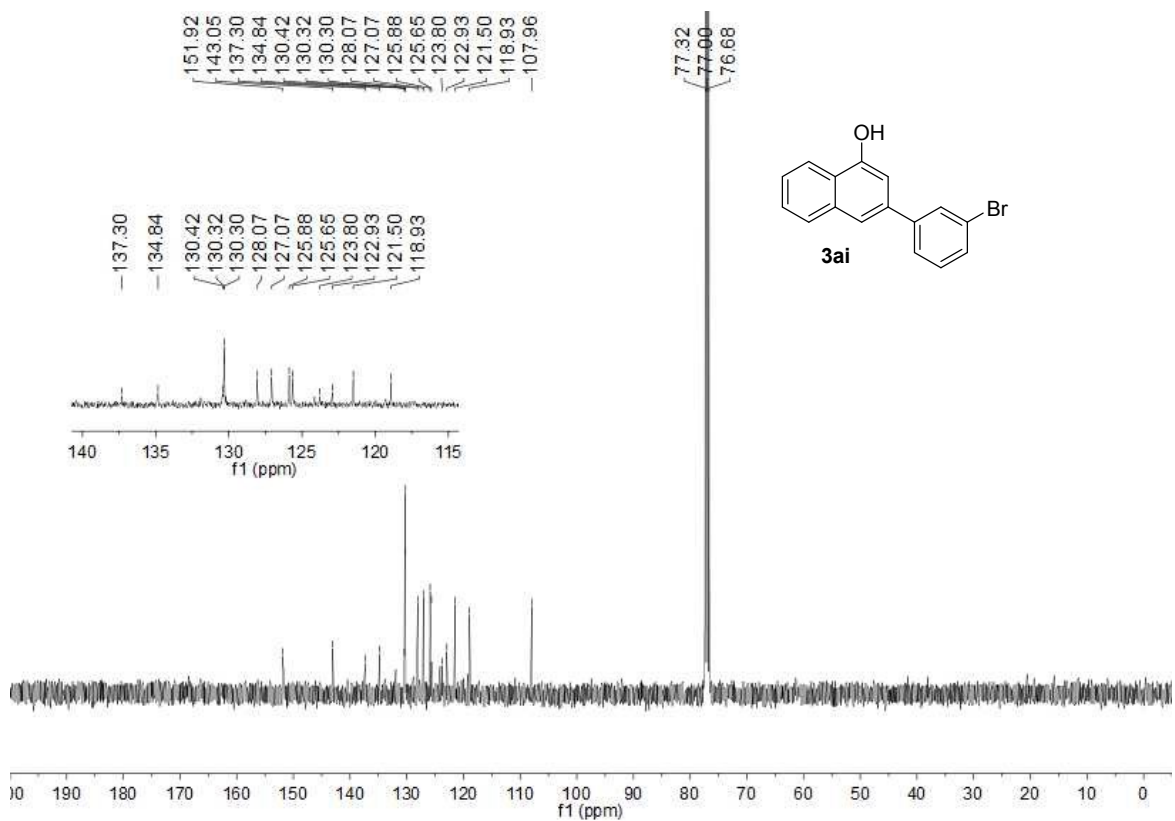

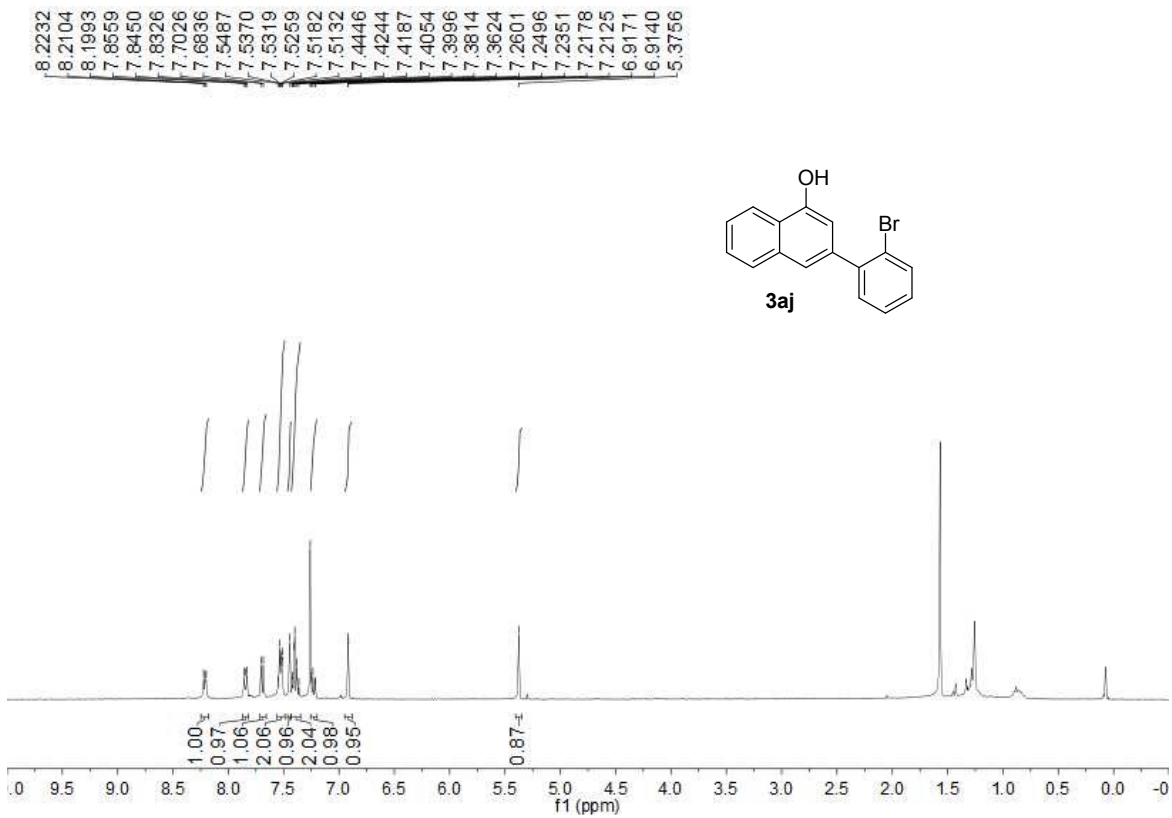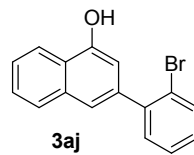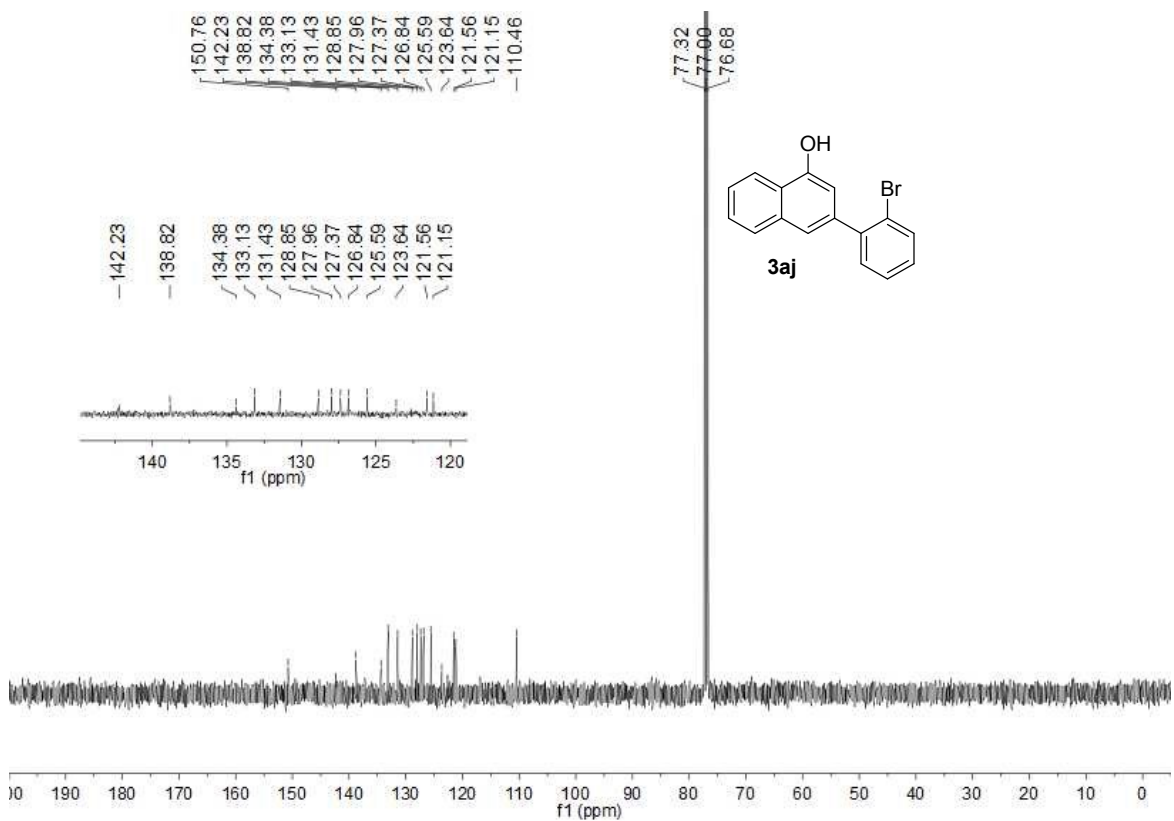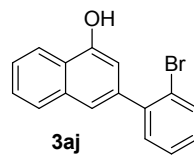

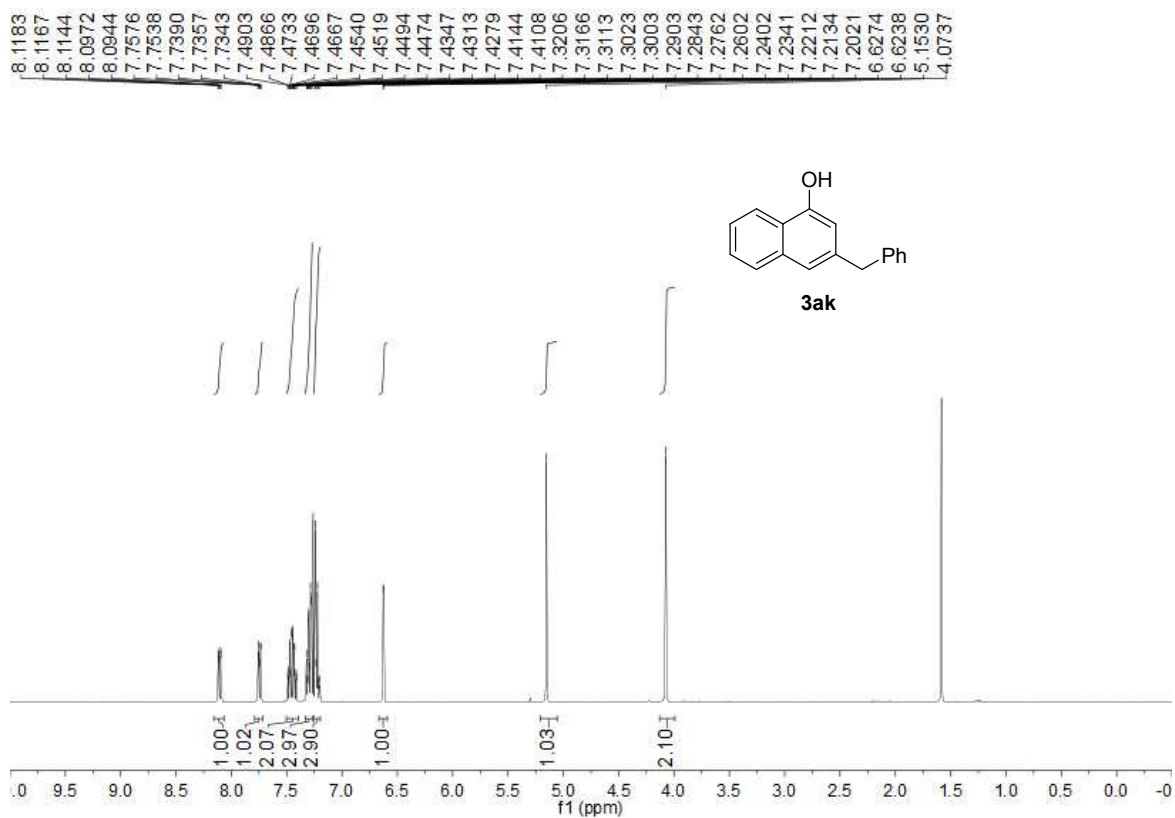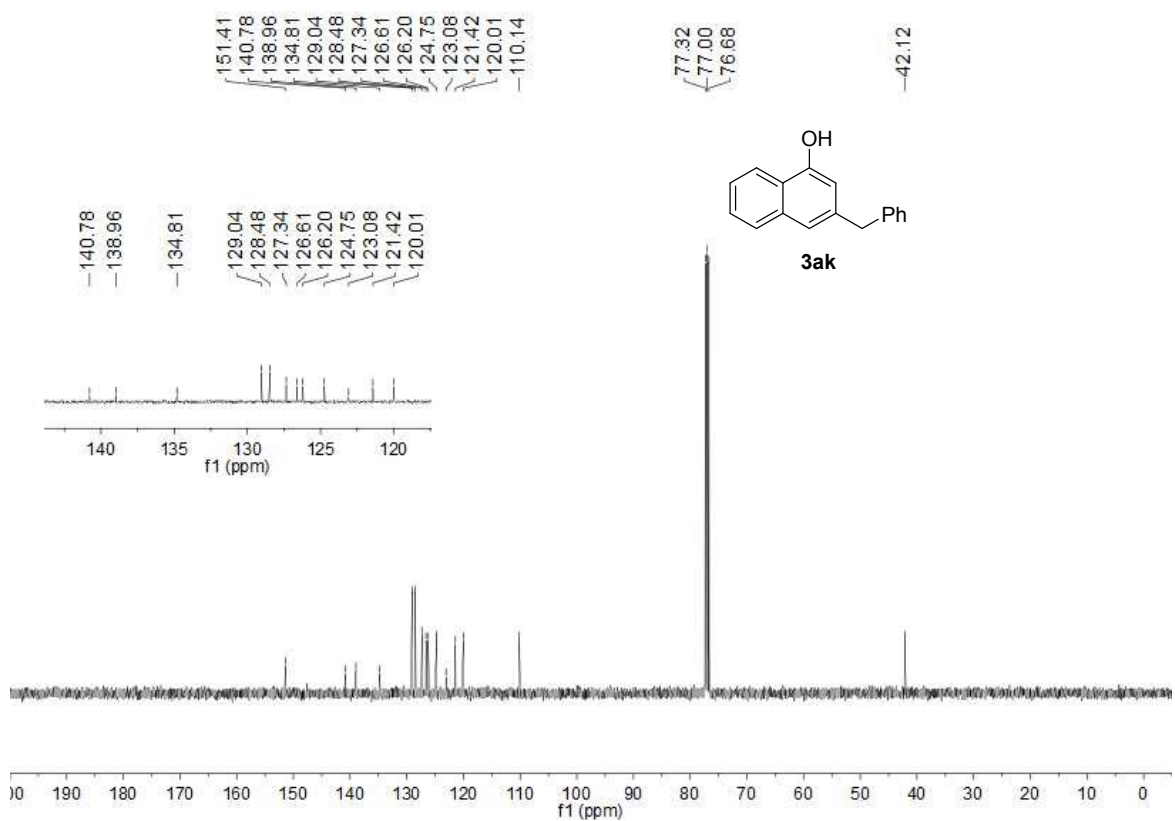

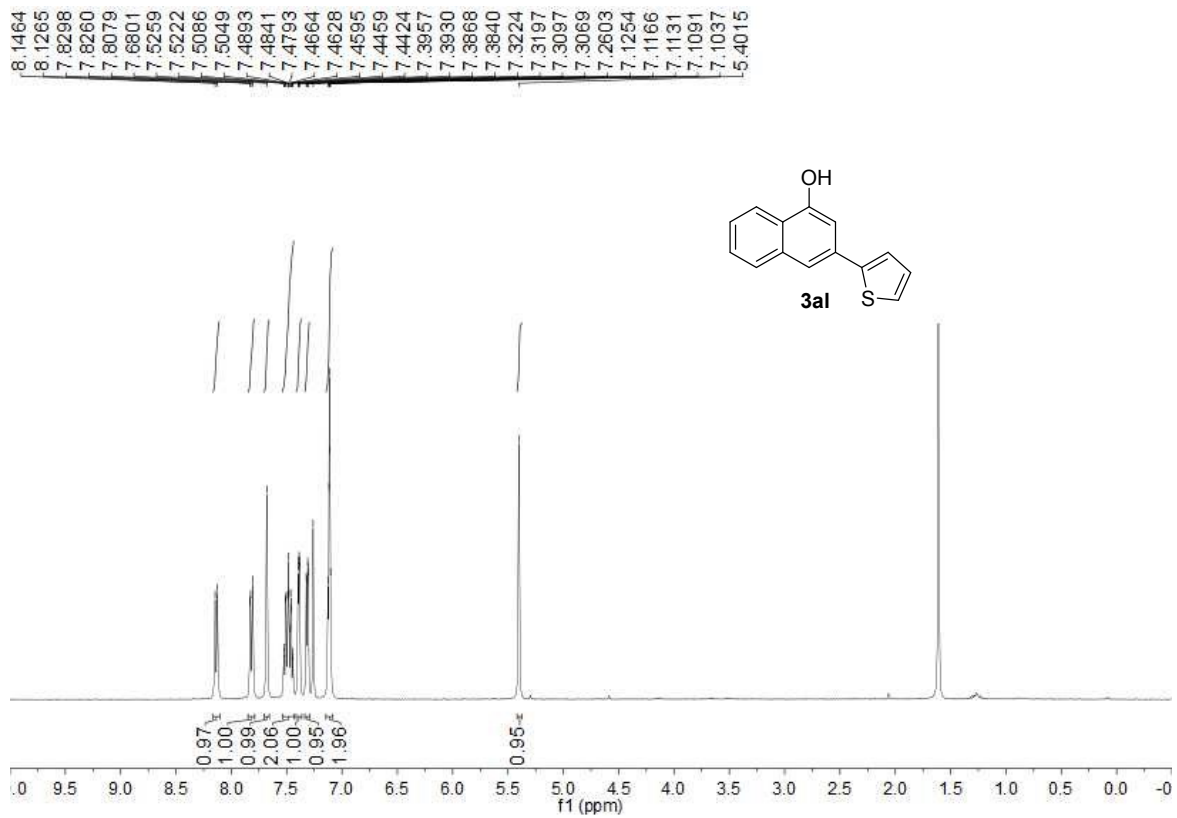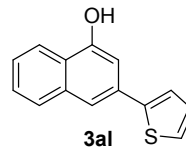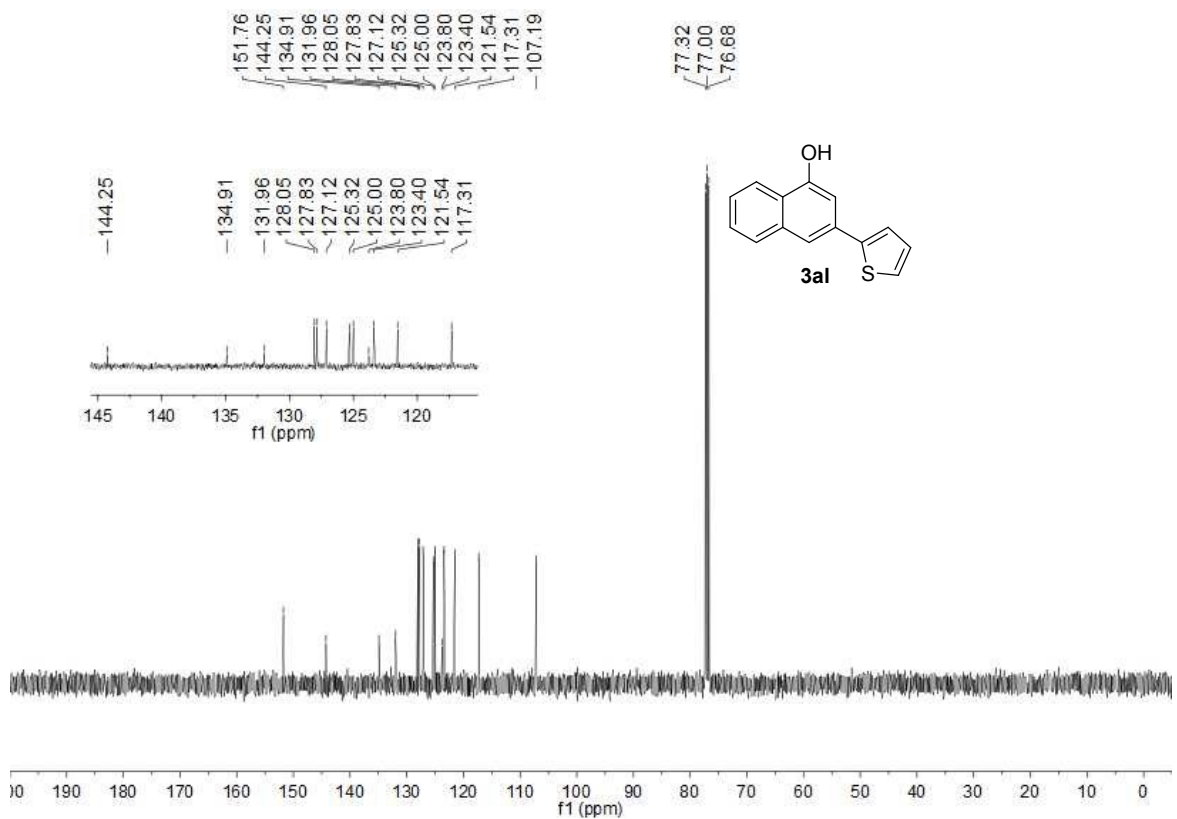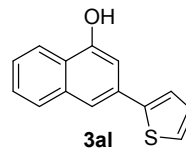

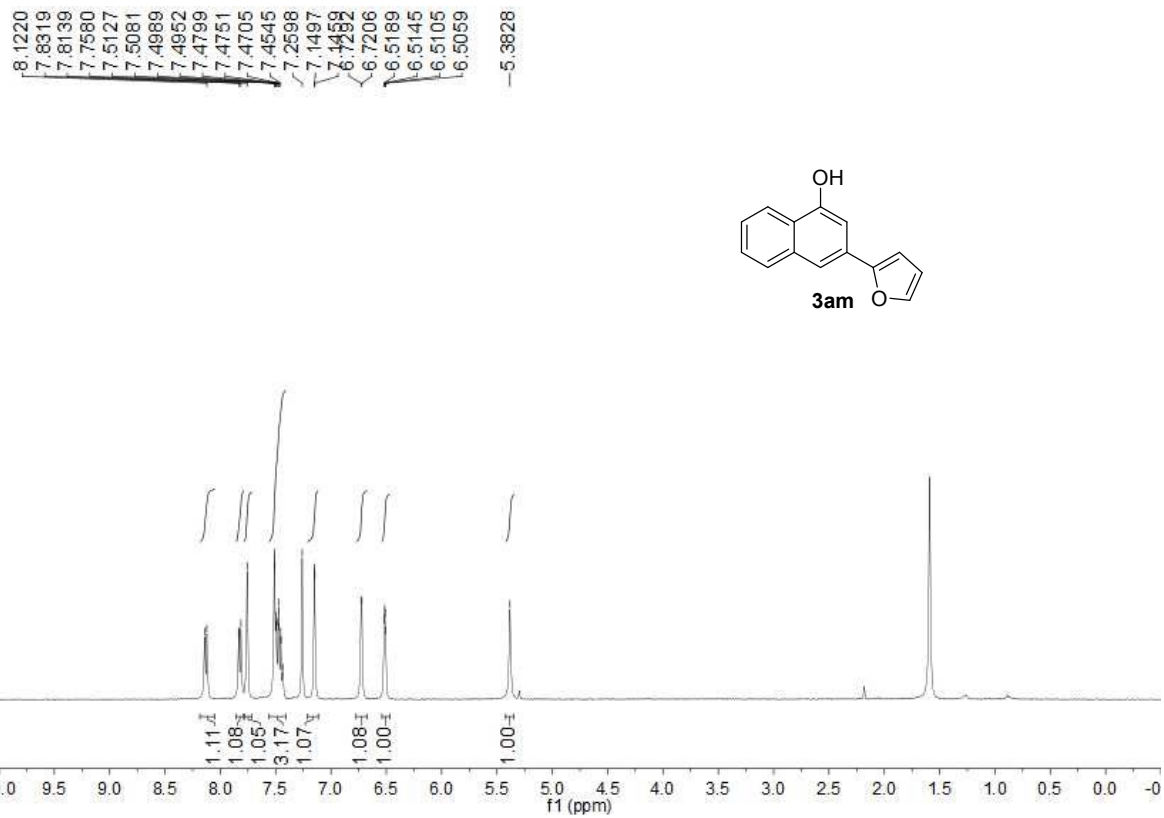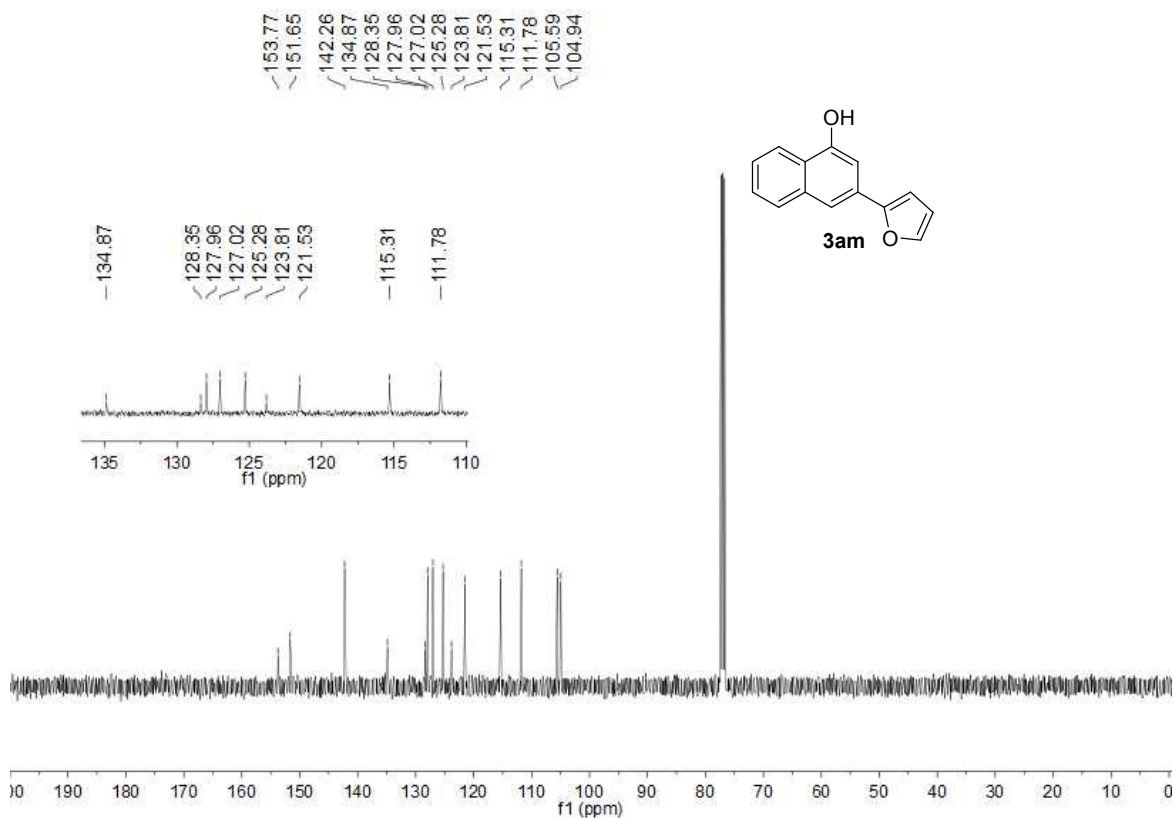

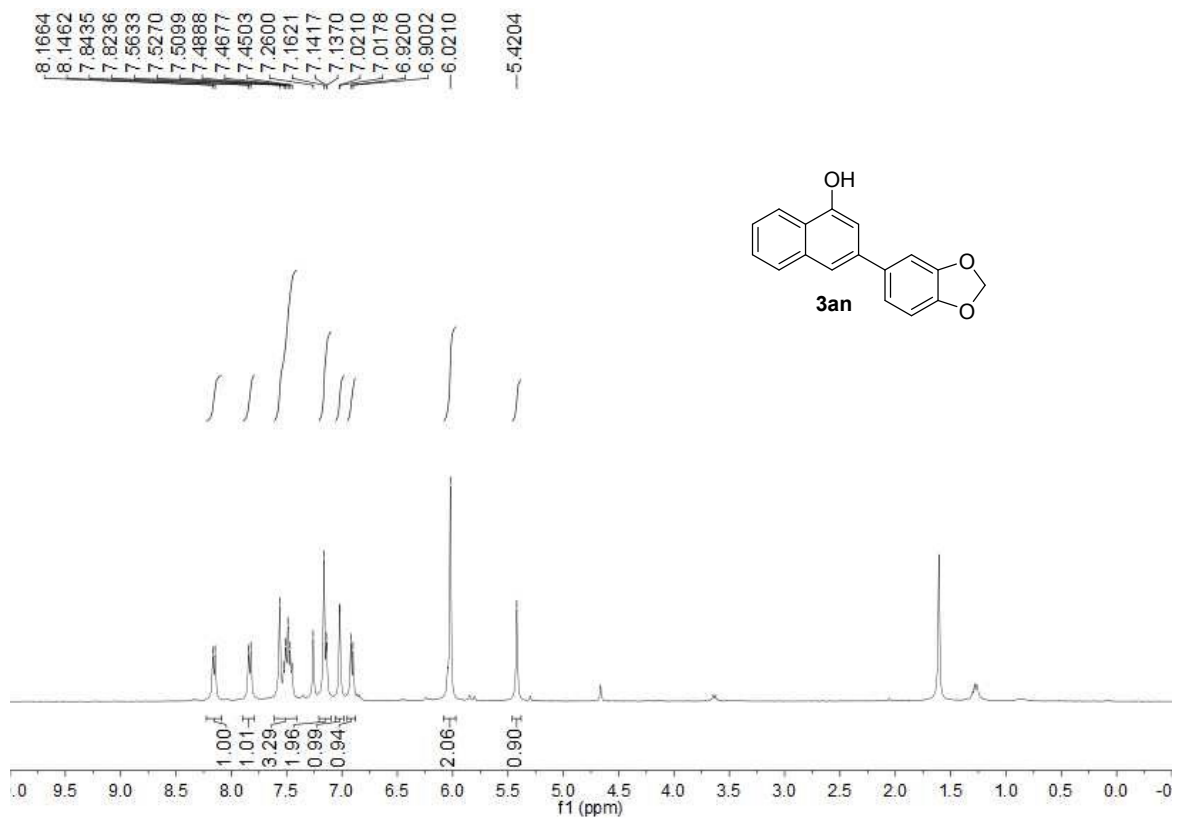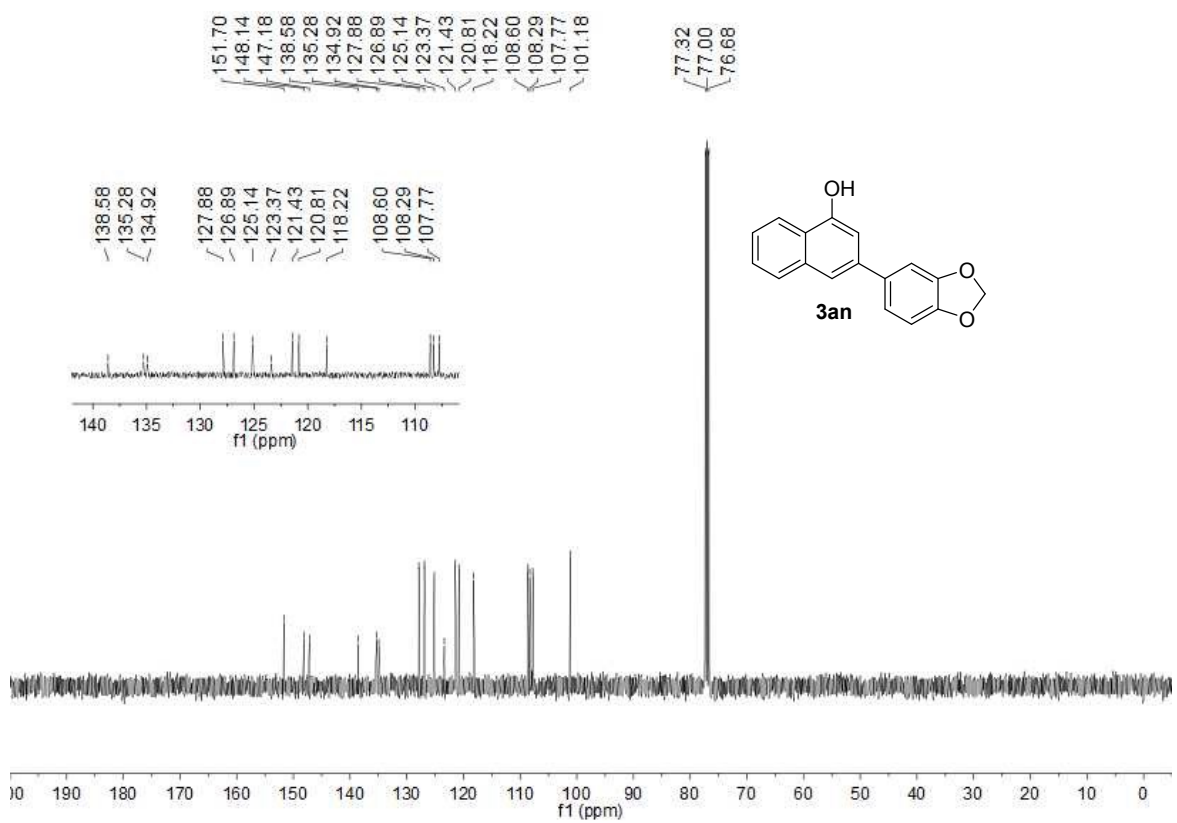

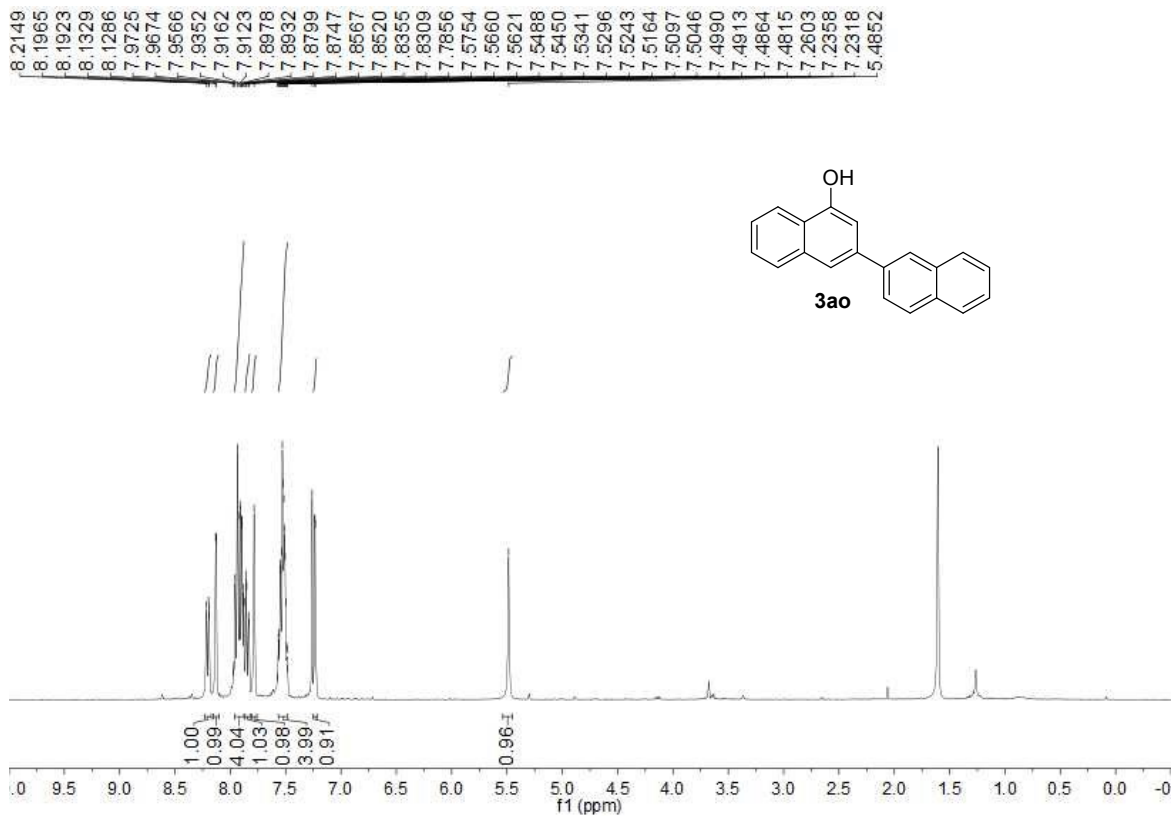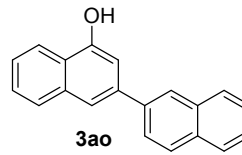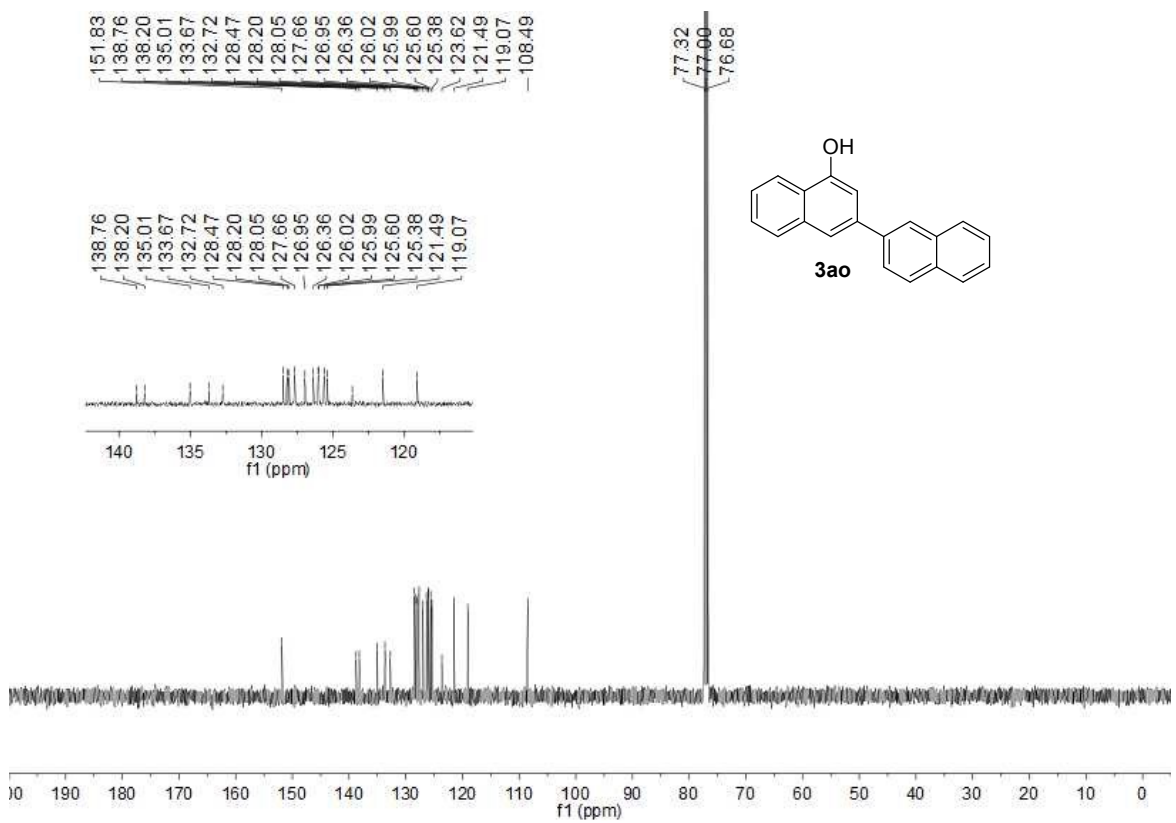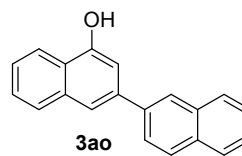

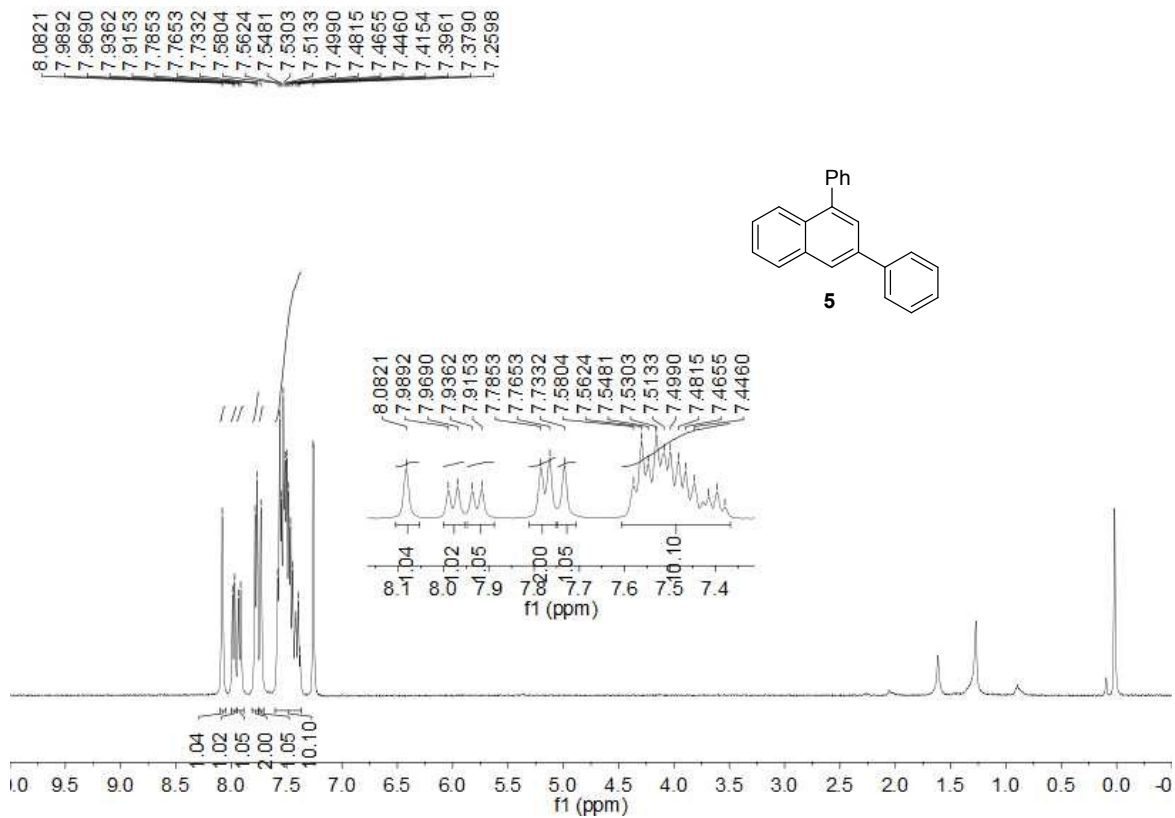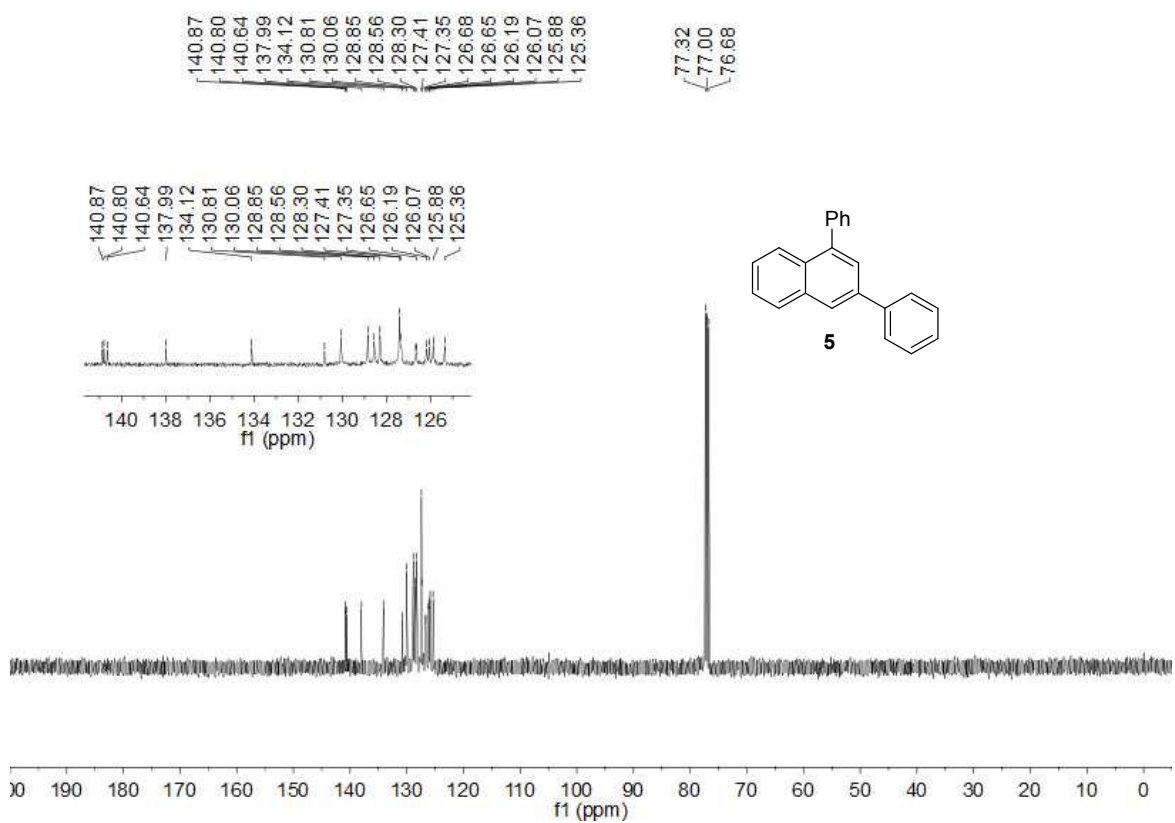

Supplement: d1cc00433f1.pdf [file d1cc00433f1.pdf]
